# Supplementary material for: Starting to have sexual intercourse is associated with increases in cervicovaginal immune mediators in young women: a prospective study and meta-analysis
Source: PubMed Central journal article supplement (PMC9596159; doi:10.7554/elife.78565), 2022-10-25

## Supplemental File 4: Meta-analyses for each immune factor

## Log2-fold difference between pre and post-first sex

This section shows the meta-analyses for each immune factor where the concentrations of at least half of the samples fell above the limit of detection. A different immune factor is shown on each page.

Each row represents a different study, with the squares indicating the mean and the lines indicating the 95% confidence intervals. Positive numbers indicate higher concentrations post-first sex, while negative numbers indicate higher pre-first sex. The size of the squares is proportional to how heavily the study is weighted in the meta-analysis.

The center of the diamond and the vertical dotted line indicates the meta-effect as determined by the random effects model. The width of the diamond indicates the 95% confidence interval of the meta-effect.

TE, treatment effect ( $\log_2$ -pg/mL of the post-first sex minus  $\log_2$ -pg/mL of the pre-first sex samples); seTE, standard error of the treatment effect; 95%-CI, 95% confidence interval around the treatment effect; Weight, the percentage of the meta-estimate contributed by each study.

# CCL20

Current study

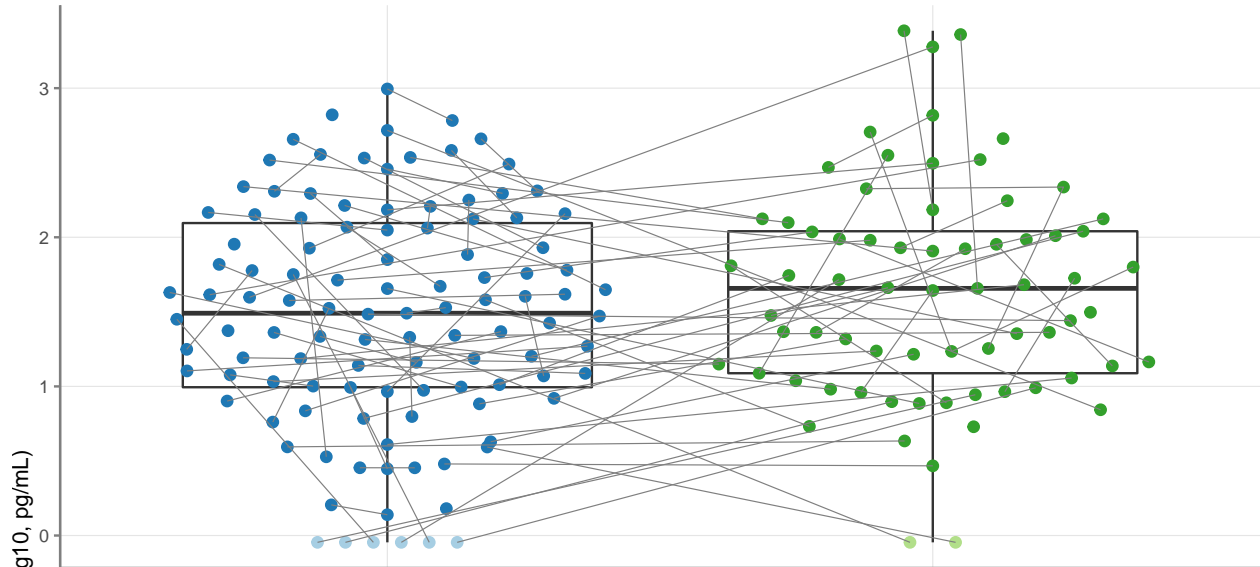

Ghosh-2018

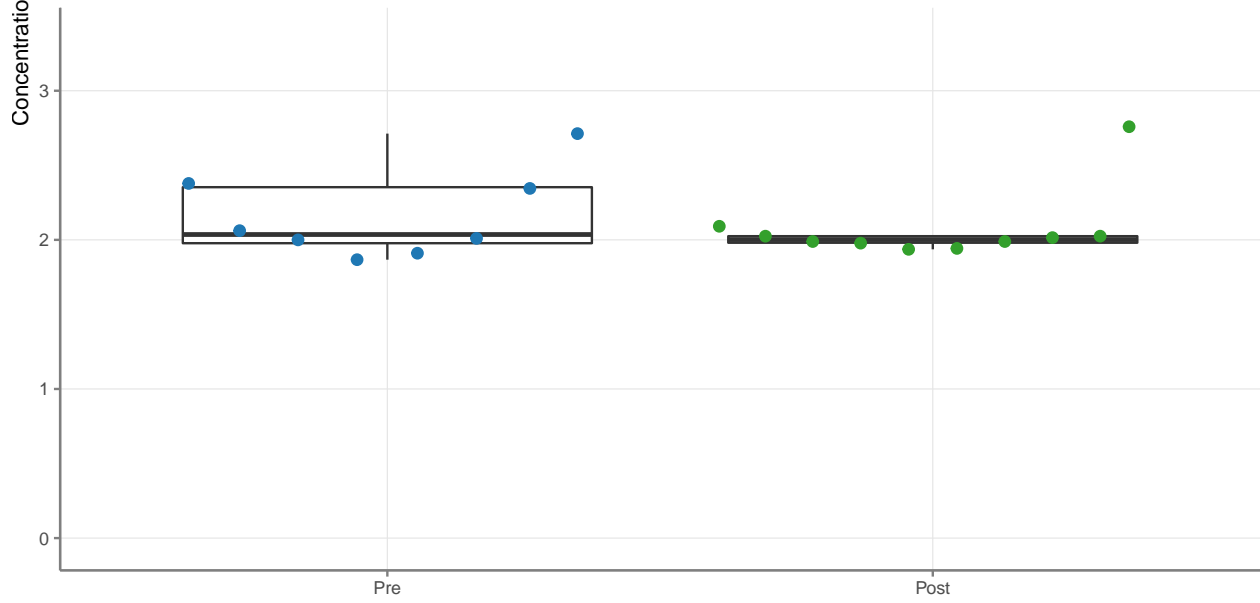

**CCL20**

**TE seTE**

**95%-CI Weight**

Ghosh-2018  
Current study

-0.28 0.4188  
0.53 0.3592

-0.28 [-1.11; 0.54] 46.5%  
0.53 [-0.18; 1.23] 53.5%

**Random effects model**  
Heterogeneity:  $I^2 = 54\%$

**0.15 [-0.64; 0.94] 100.0%**

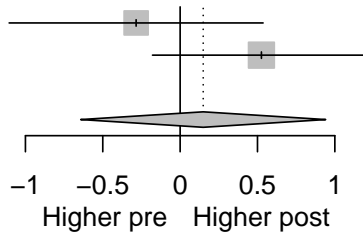

# CCL4

Current study

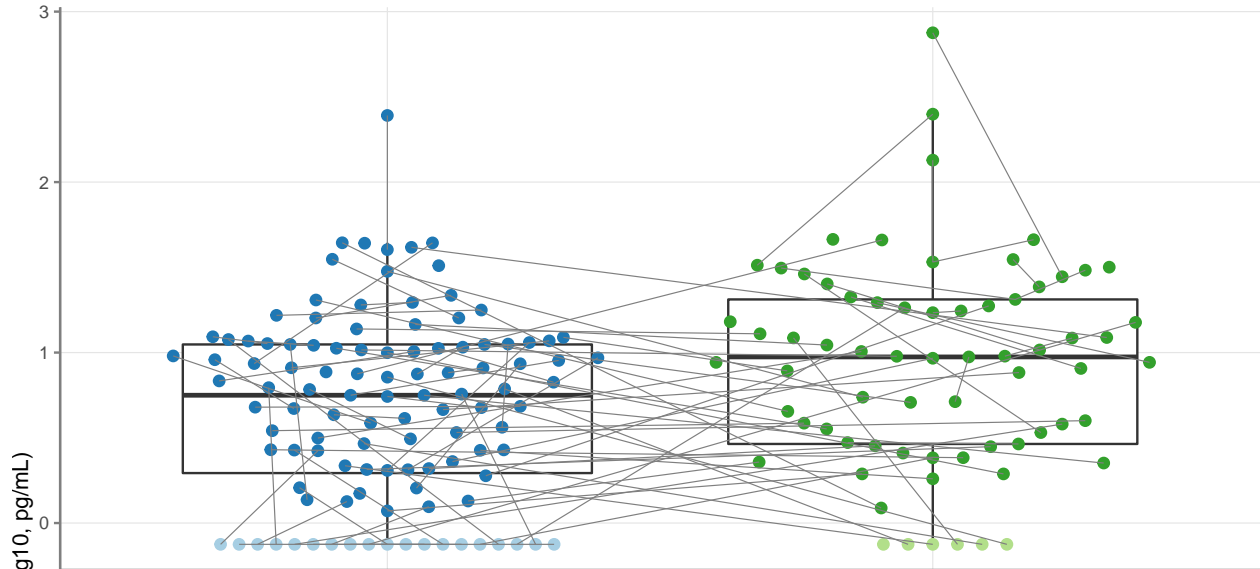

Jespers-2016

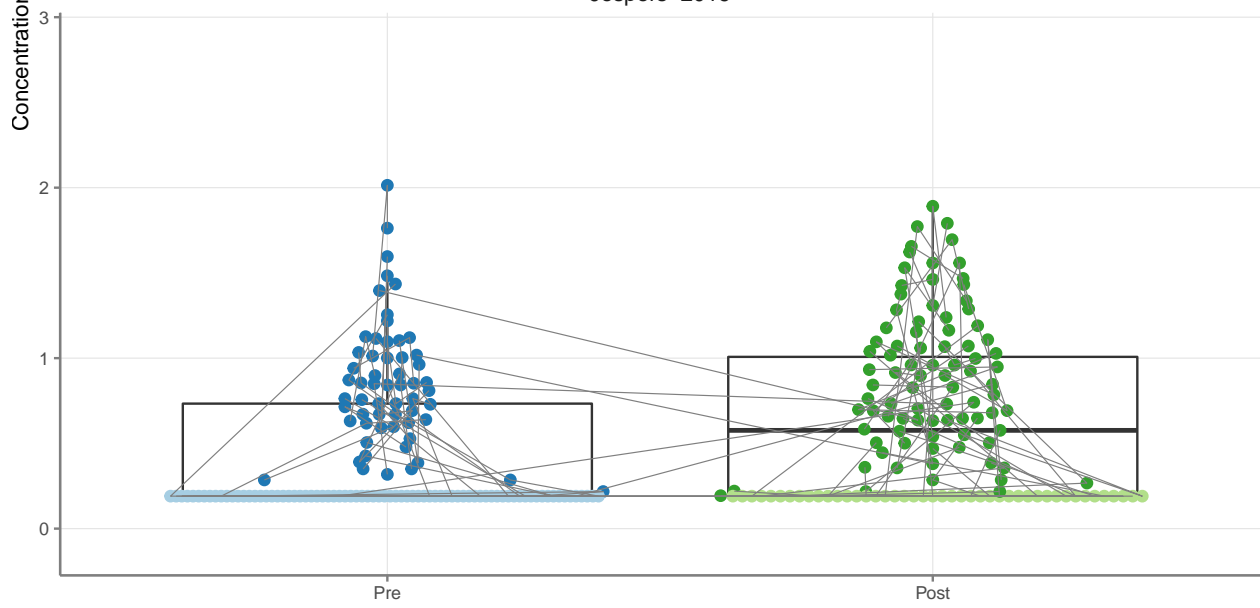

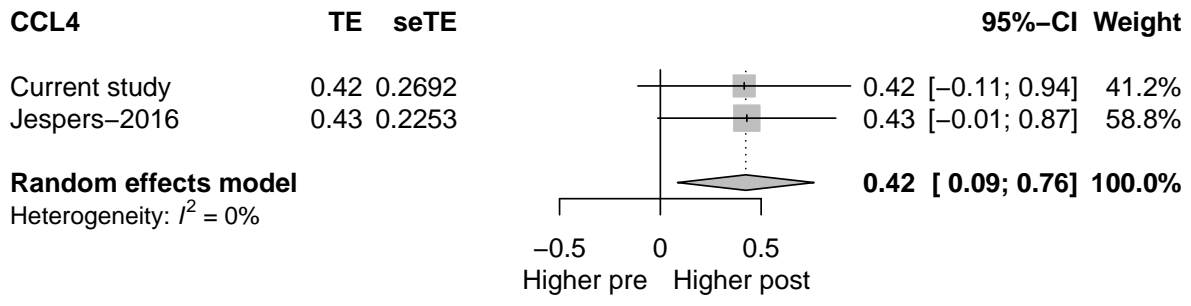

# CCL5

Current study

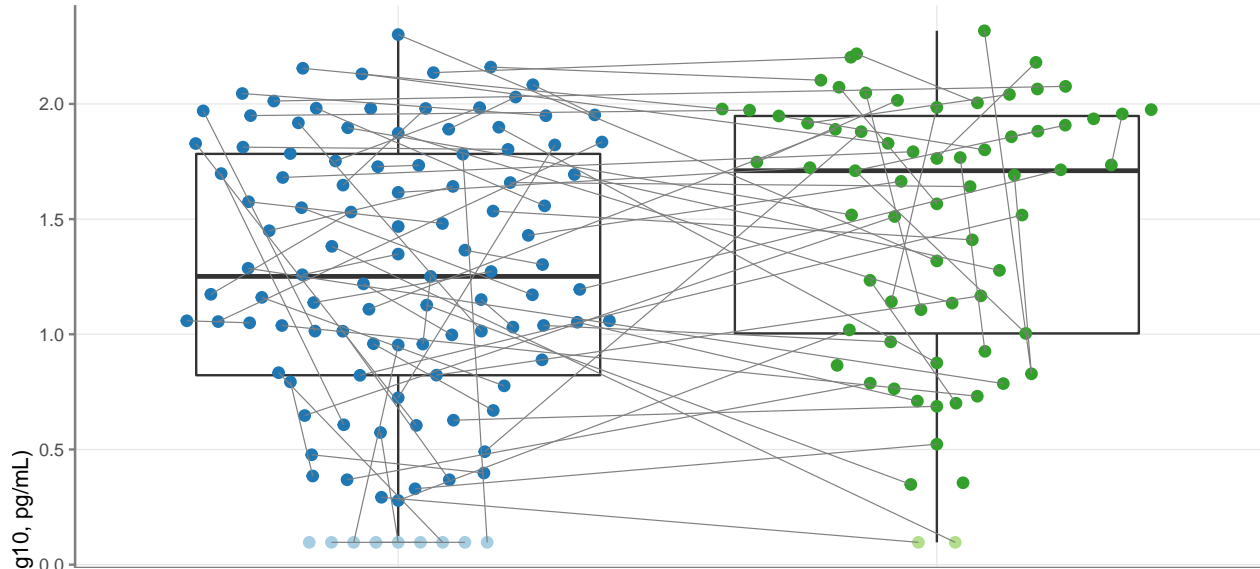

Jespers-2016

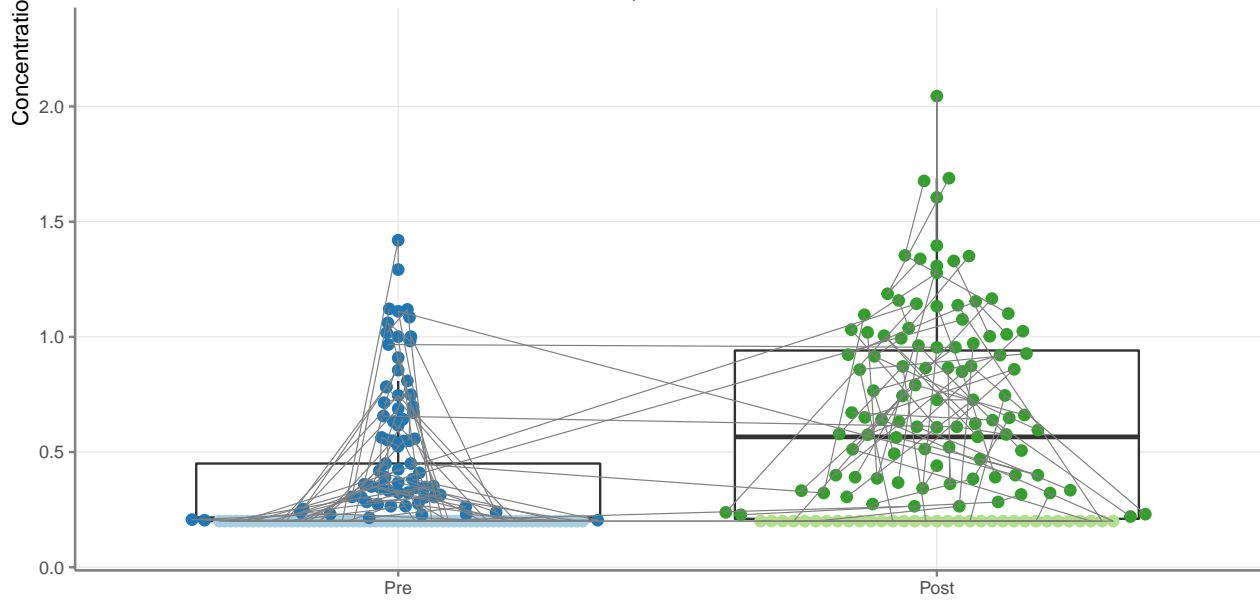

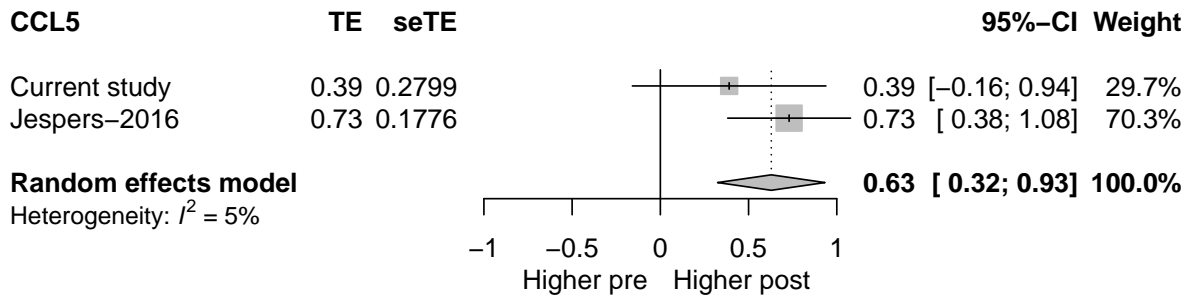



# CXCL10

Current study

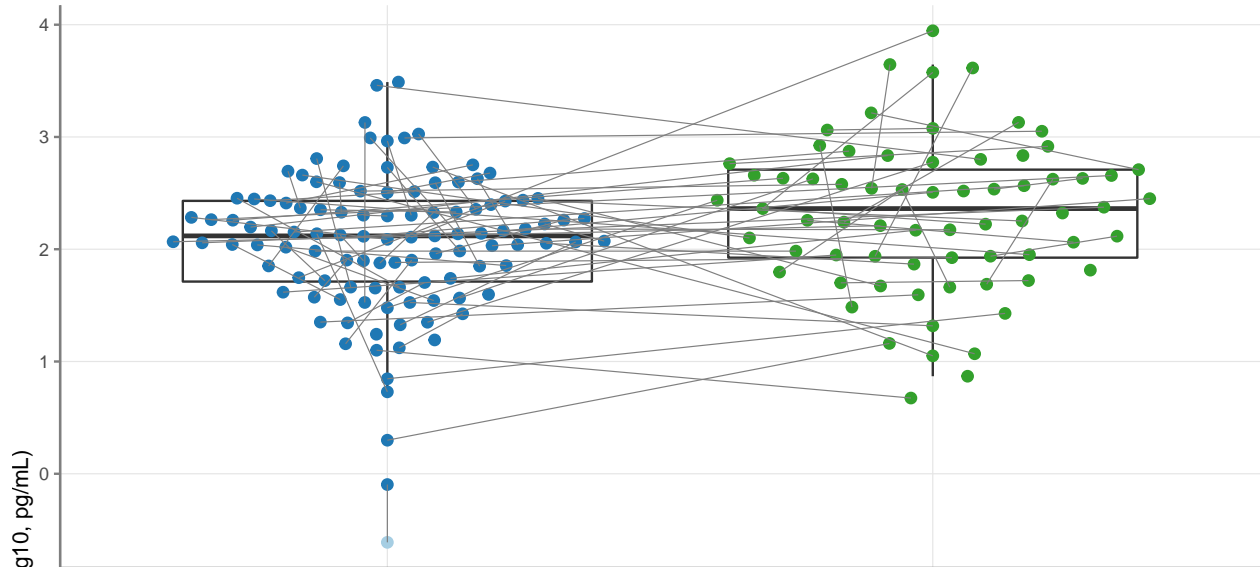

Jespers-2016

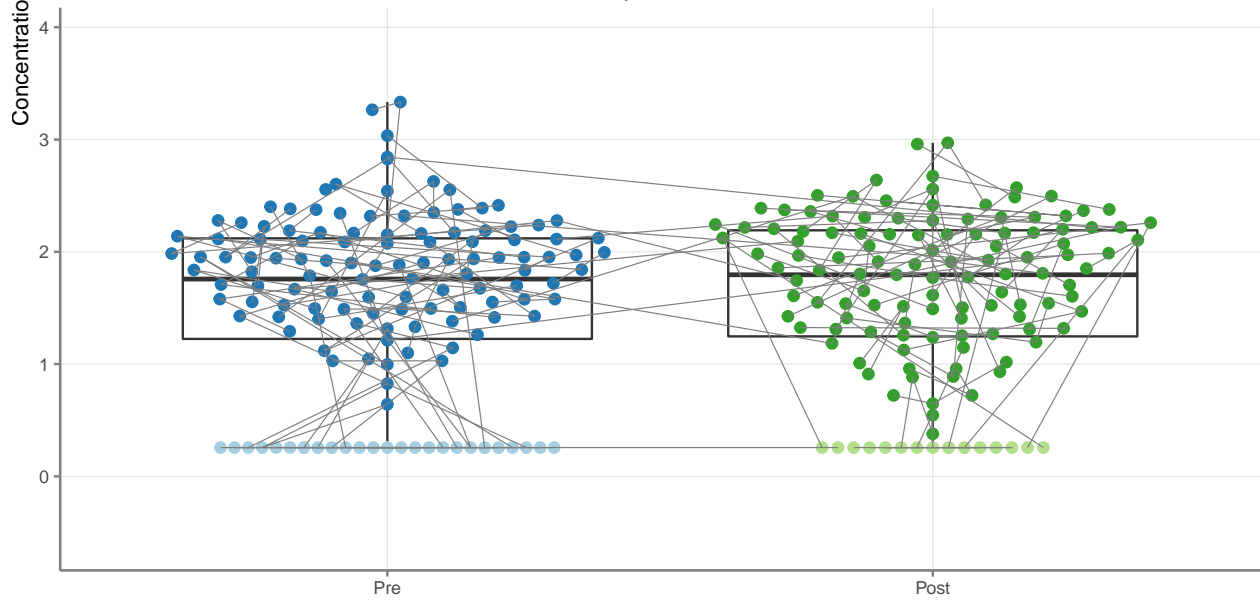

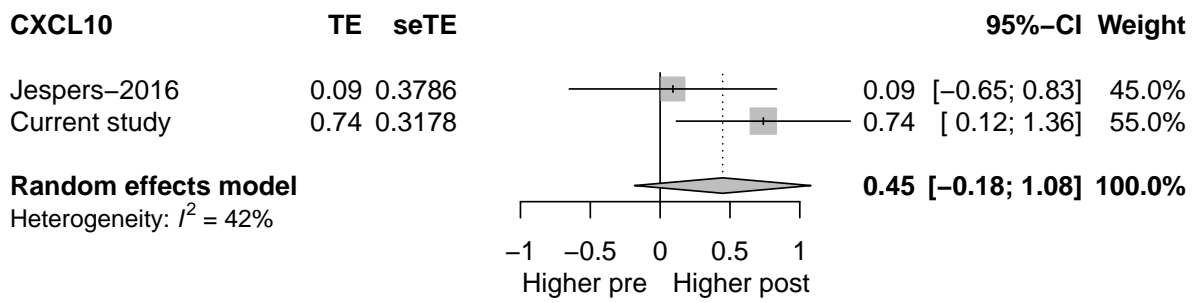

# CXCL8

Current study

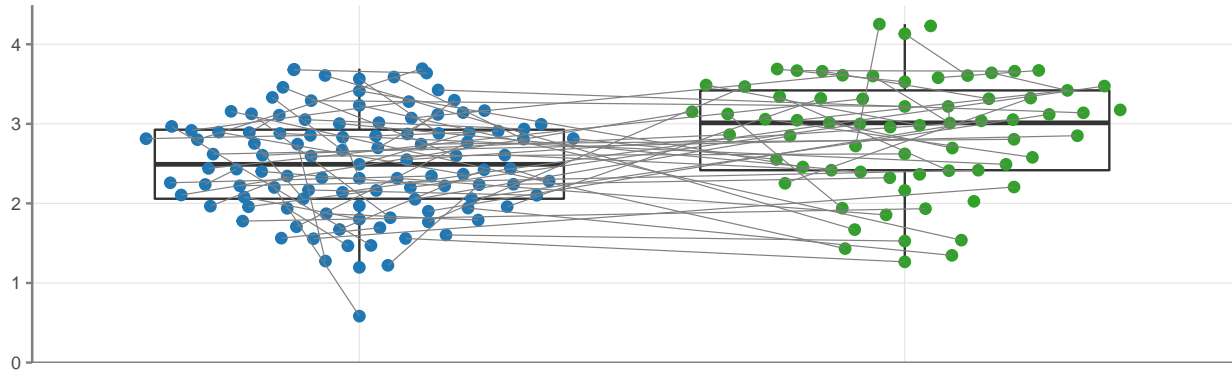

Ghosh-2018

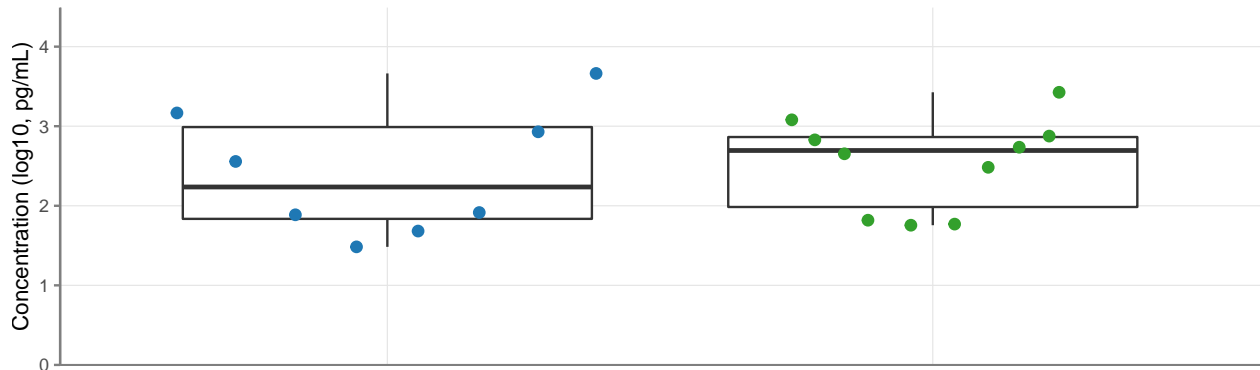

Jespers-2016

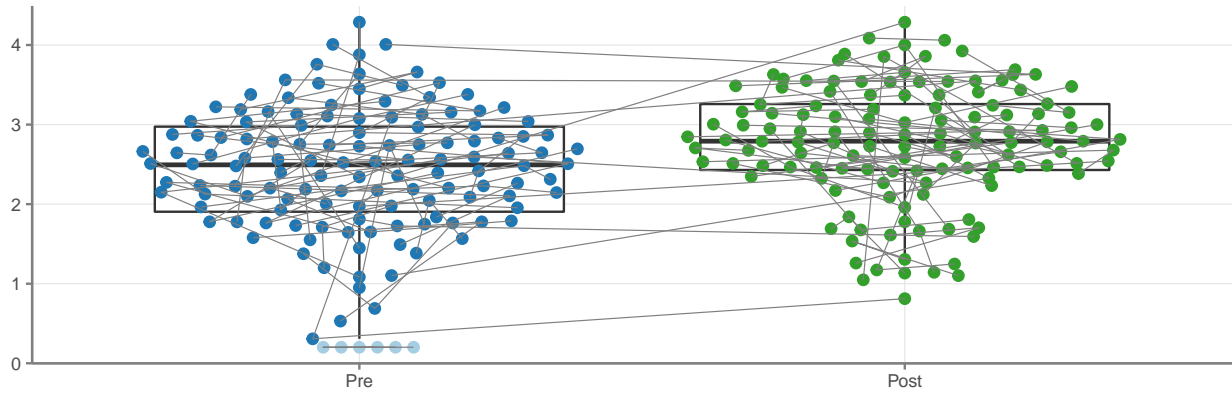

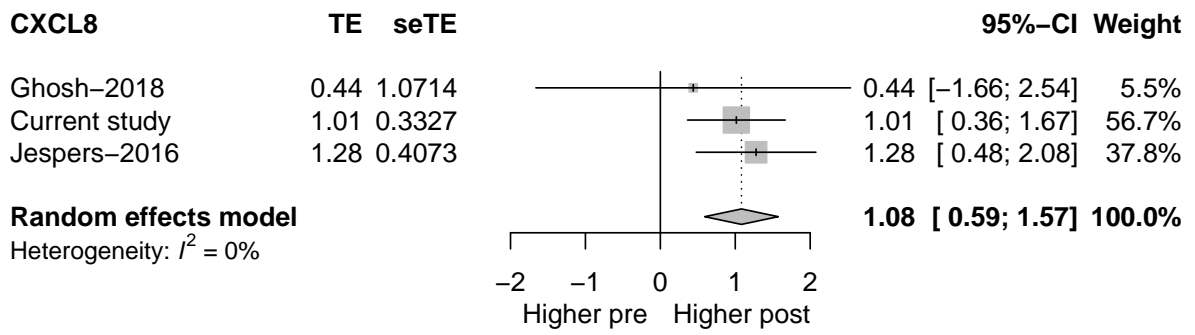

# IL-1a

Current study

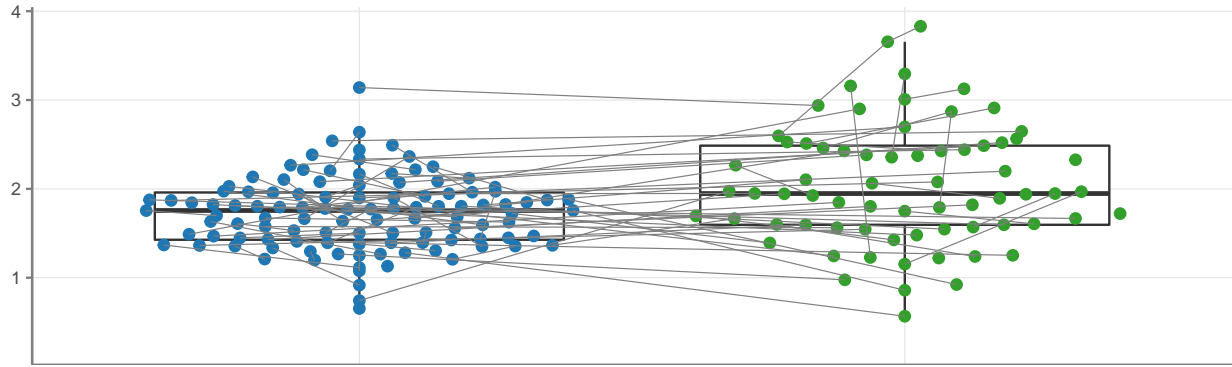

Ghosh-2018

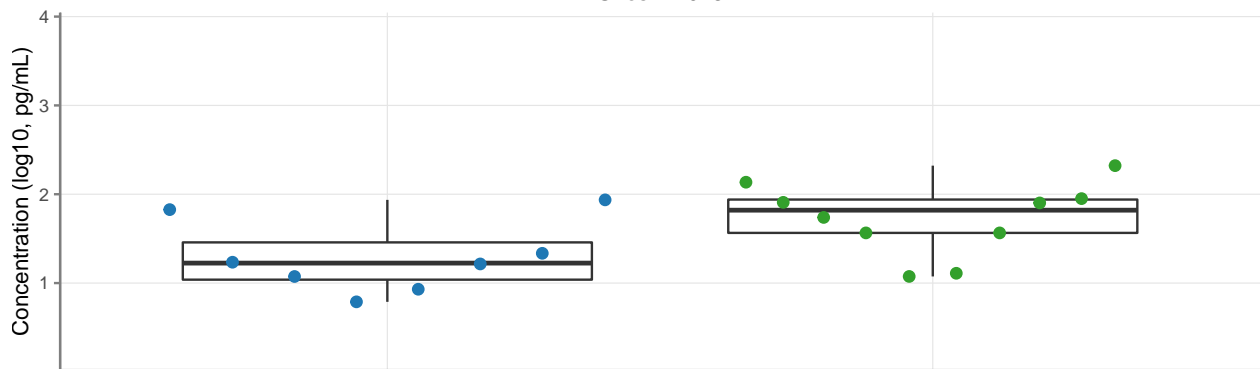

Jespers-2016

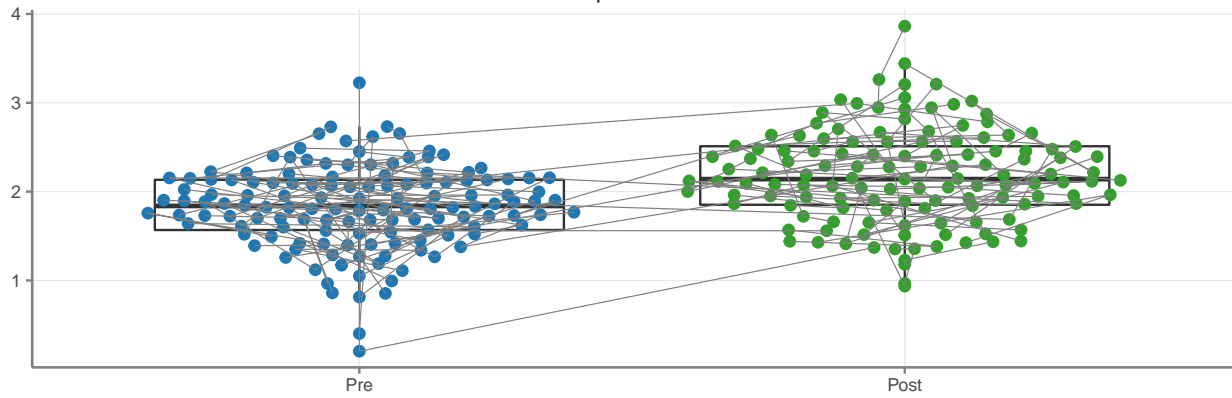

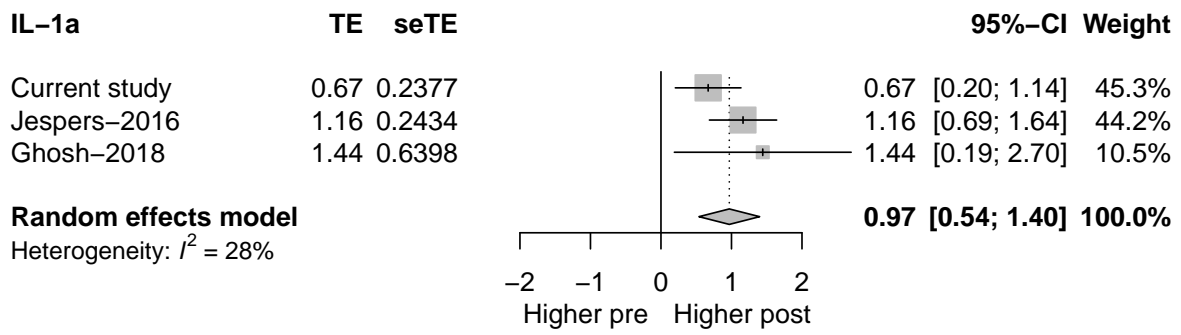

# IL-1b

Current study

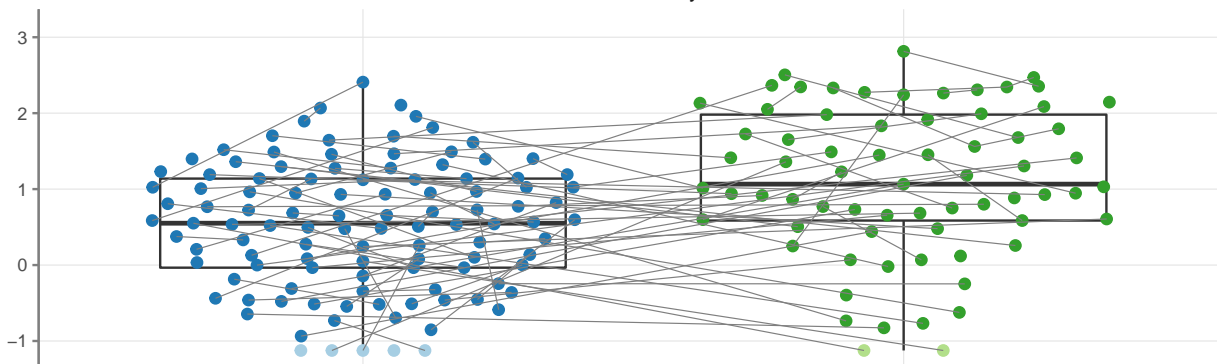

Ghosh-2018

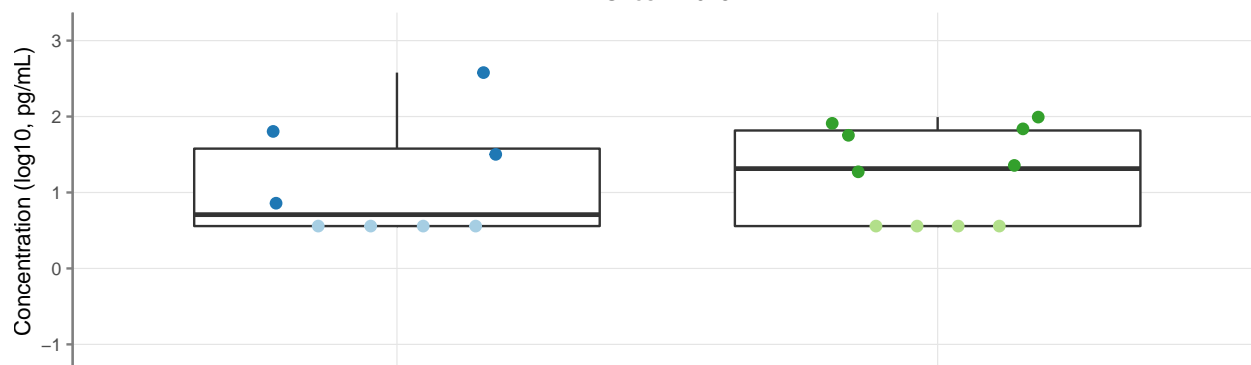

Jespers-2016

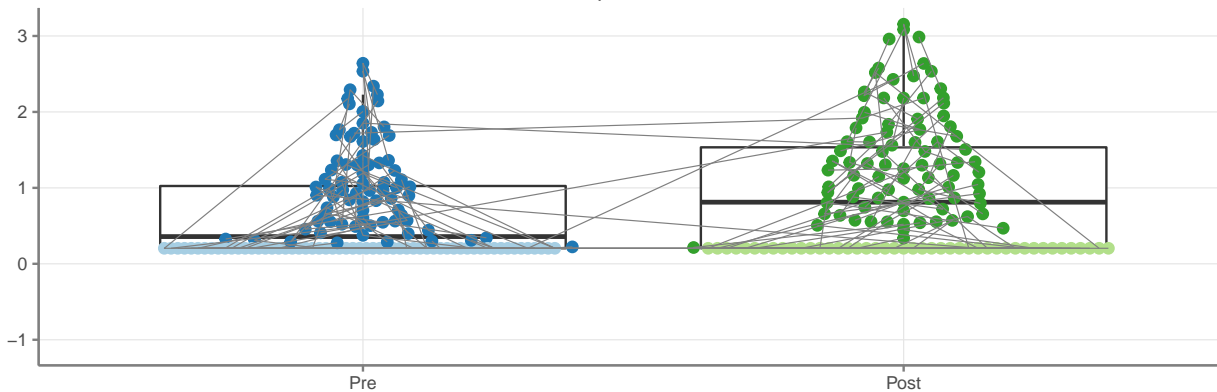

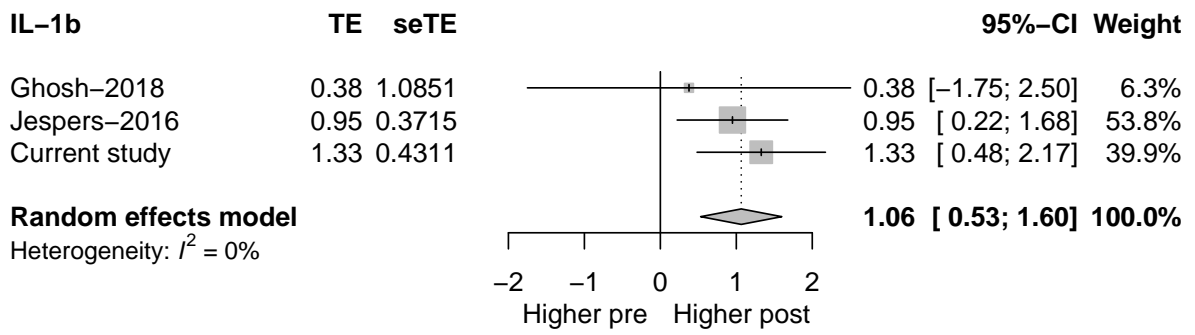



# IL-6

Current study

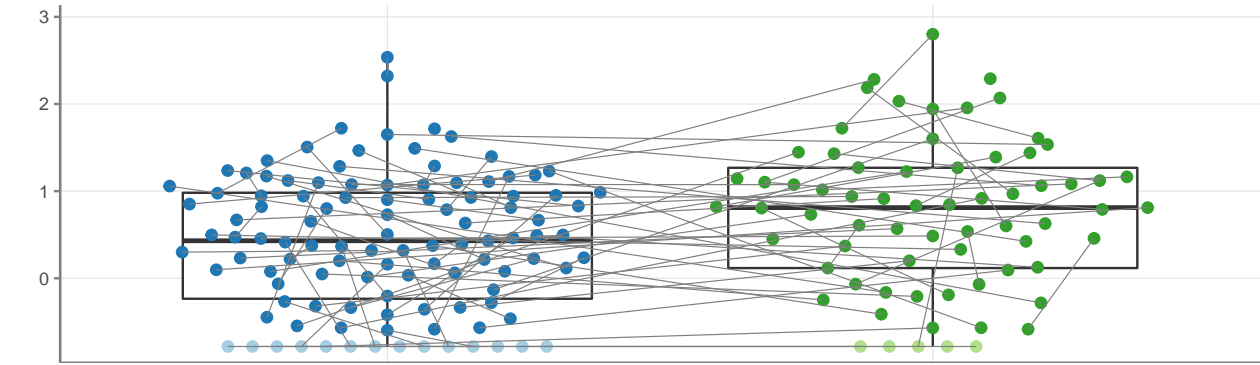

Ghosh-2018

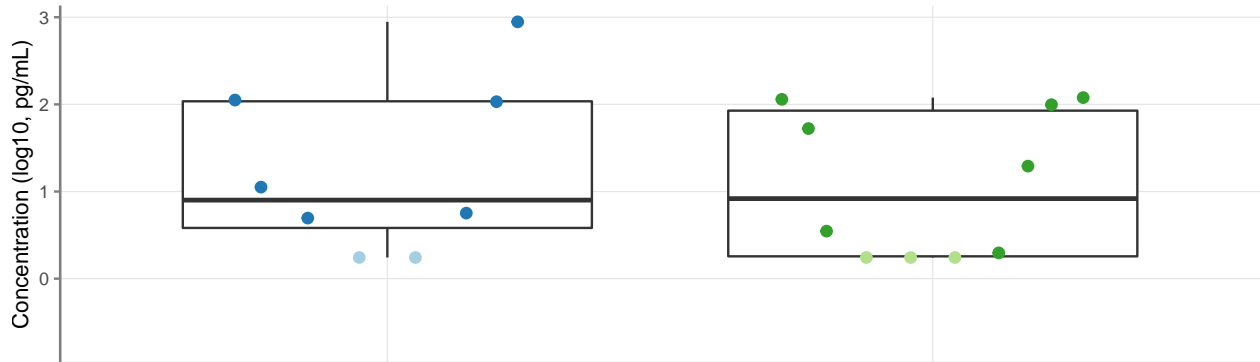

Jespers-2016

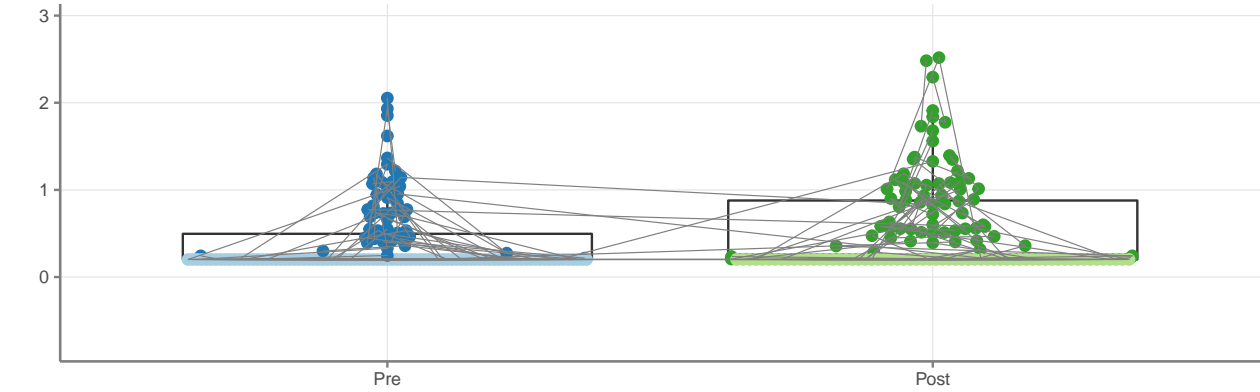

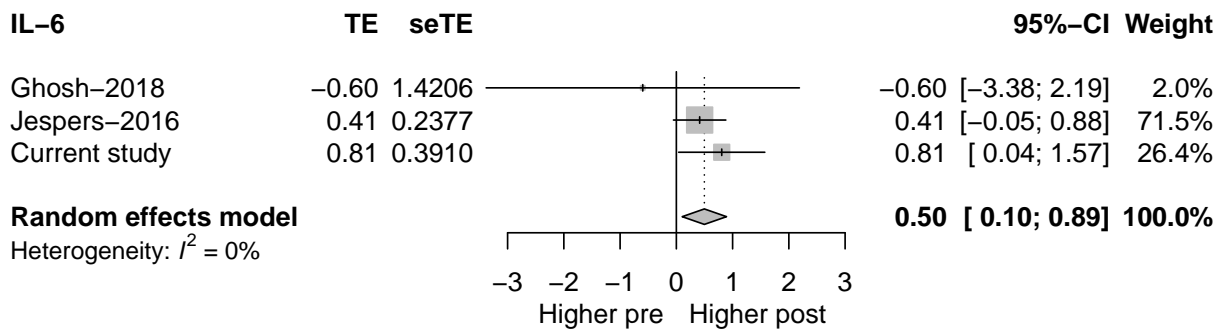

# TNF

Current study

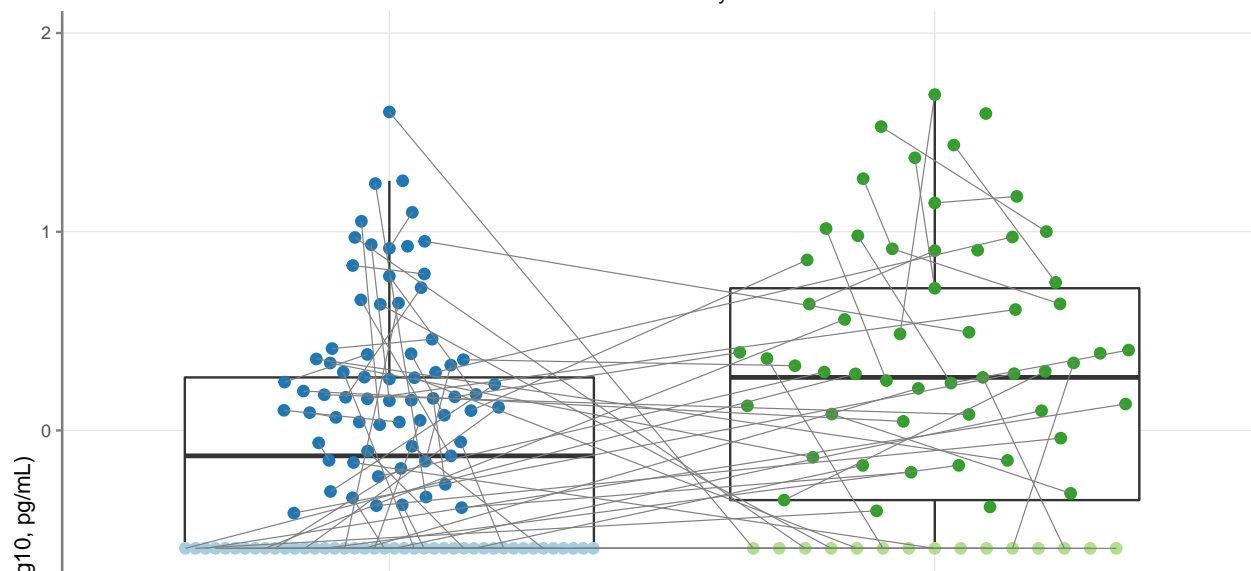

Ghosh-2018

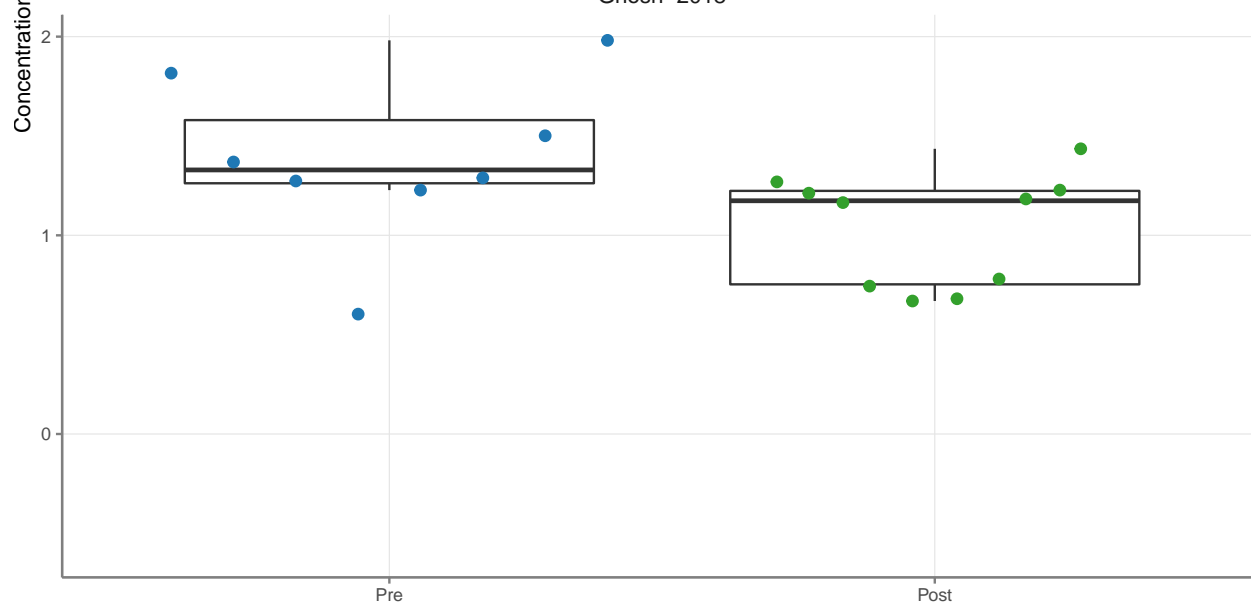

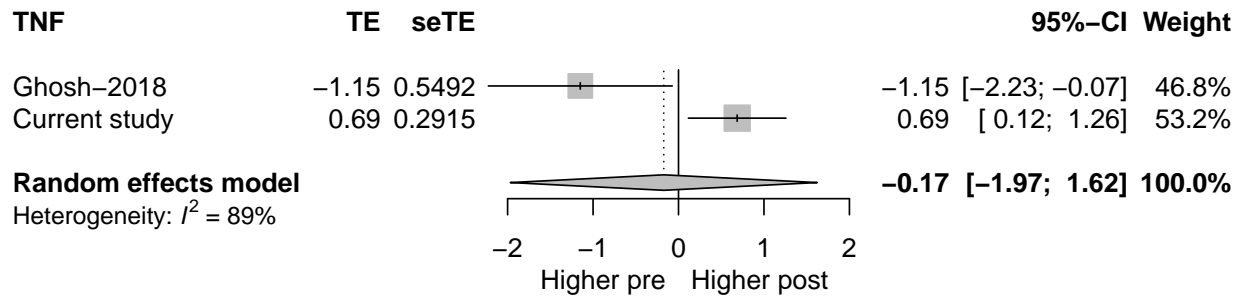

Supplement: elife-78565-supp4.pdf [file elife-78565-supp4.pdf]
