# Supplementary material for: Starting to have sexual intercourse is associated with increases in cervicovaginal immune mediators in young women: a prospective study and meta-analysis
Source: eLife journal article supplement (doi:10.7554/elife.78565), 2022-10-06
Supplement: code1 [file 2020-08-20_DataFile 2020-aug-20_complete_BV_STI.xlsx]

## Sheet: DataFile_2020_aug_20
Patient ID	Collection Date	SPID	pfge_vscode	pfge_vscode_num	LMP	days since LMP	STI positive	CT	GC	TV	BV nugent score	days since first sex	birth control	pregnant	Y-chrom	Age at enrollment	Age at visit	HSV PCR result	HSV WB at enrollment	HSV WB at visit	first_sex_date	first_sex_STI_Ychrom	first_sex_min	category	time
630024	2015-08-24	2015-28345	12.0	12	2015-08-03	21	no	2	2	2	0		none	N	N	17.1	18.1	N	1					no-sex	1
630024	2015-11-27	2015-36004	15.0	15	2015-11-07	20	no	2	2	2	0		none	N	N	17.1	18.4	N	1					no-sex	2
630037	2015-04-17	2015-18846	09.0	9	2015-04-12	5					0	-45	none	N	N	18.1	18.7	N	1	1	2015-06-01	2015-06-16	2015-06-01	yes-sex	1
630037	2015-09-09	2015-28514	12.0	12	2015-06-16	85	no	2	2	2	0	100	none	Y	N	18.1	19.1	N	1		2015-06-01	2015-06-16	2015-06-01	yes-sex	2
630040	2015-08-18	2015-28257	12.0	12	2015-08-05	13	no	2	2	2	0	-476	none	N	N	18.3	19.3	N	1		2017-01-20	2016-12-06	2016-12-06	no-sex	1
630040	2015-12-11	2015-36272	15.0	15	2015-11-01	40	no	2	2	2	0	-361	none	N	N	18.3	19.6	N	1		2017-01-20	2016-12-06	2016-12-06	no-sex	2
630053	2015-06-02	2015-19218	09.0	9	2015-05-29	4					0		none	N	N	18.3	19	N	1	1				no-sex	1
630053	2015-08-18	2015-28261	12.0	12	2015-08-05	13	no	2	2	2	0		none	N	N	18.3	19.2	N	1	1				no-sex	2
630066	2015-03-06	2015-18674	06.0	6	2015-02-17	17					0	-56	none	N	N	18	18.5	N	1		2015-05-01		2015-05-01	yes-sex	1
630066	2015-06-02	2015-19226	09.0	9	2015-05-17	16	no	2	2	2	0	32	none	N	N	18	18.7	N	1		2015-05-01		2015-05-01	yes-sex	2
630079	2015-06-16	2015-19306	09.0	9	2015-06-07	9					0		none	N	N	17.9	18.6	N	0					no-sex	1
630079	2015-09-15	2015-28560	12.0	12	2015-08-27	19	no	2	2	2	0		none	N	N	17.9	18.9	N	0					no-sex	2
630082	2014-10-03	2015-5817	00.0	0	2014-09-08	25	no	0	0	0	0	-81		N	N	19.3	19.3	N	1	1	2014-12-23	2015-01-20	2014-12-23	yes-sex	1
630082	2015-01-20	2015-18578	03.0	3	2015-01-14	6					8	28	none	N	P	19.3	19.6	N	1		2014-12-23	2015-01-20	2014-12-23	yes-sex	2
630109	2015-04-08	2015-18782	06.0	6	2015-04-01	7	no	2	2		0	0	none	N	P	20.8	21.4	N	1			2015-04-08	2015-04-08	no-sex	1
630109	2015-09-30	2015-35353	12.0	12	2015-09-16	14	chlam	1	2	2	0	175	none	N	N	20.8	21.8	N	1			2015-04-08	2015-04-08	no-sex	2
630125	2015-01-08	2015-18526	03.0	3	2014-12-25	14	no	2	2		0	-24	none	N	N	18.5	18.7	N	1		2015-02-01	2018-10-10	2015-02-01	yes-sex	1
630125	2015-04-08	2015-18766	06.0	6	2015-04-02	6	no	2	2	2	4	66	none	N	N	18.5	19	N	1		2015-02-01	2018-10-10	2015-02-01	yes-sex	2
630138	2015-04-08	2015-18774	06.0	6	2015-03-11	28	no	2	2		0	0	none	N	P	19.4	19.8	N	1		2016-09-27	2015-04-08	2015-04-08	no-sex	1
630138	2015-07-15	2015-27939	09.0	9	2015-06-24	21	no	2	2	2	0	98	none	N	N	19.4	20.1	N	1		2016-09-27	2015-04-08	2015-04-08	no-sex	2
630183	2015-05-20	2015-19174	06.0	6	2015-05-05	15					0		none	N	N	20	20.5	N	1	1				no-sex	1
630183	2015-08-04	2015-28095	09.0	9	2015-07-28	7	no	2	2	2	0		none	N	N	20	20.7	N	1					no-sex	2
630196	2015-05-12	2015-19106	06.0	6	2015-04-28	14					0	-601	none	N	N	18.5	19	N	1		2017-01-02		2017-01-02	no-sex	1
630196	2015-07-31	2015-28059	09.0	9	2015-07-10	21	no	2	2	2	0	-521	none	N	N	18.5	19.2	N	1		2017-01-02		2017-01-02	no-sex	2
630200	2015-07-31	2015-28055	09.0	9	2015-07-17	14	chlam	1	2	2	9	80	none	N	N	19	19.8	N	1		2015-11-06	2015-05-12	2015-05-12	yes-sex	1
630200	2015-11-24	2015-35928	12.0	12	2015-11-13	11	chlam	1	2	2	0	196	none	N	N	19	20.1	N	1		2015-11-06	2015-05-12	2015-05-12	yes-sex	2
630213	2015-02-02	2015-18586	03.0	3	2015-01-06	27					0	-850	none	N	N	19	19.3	N	1		2017-06-01		2017-06-01	no-sex	1
630213	2015-07-21	2015-27959	09.0	9	2015-06-24	27	no	2	2	2	0	-681	none	N	N	19	19.7	N	1		2017-06-01		2017-06-01	no-sex	2
630242	2015-02-04	2015-18574	03.0	3	2015-01-17	18					0	-96	none	N	N	21.3	21.5	N	1		2017-10-11	2015-05-11	2015-05-11	no-sex	1
630242	2015-05-11	2015-19090	06.0	6	2015-04-29	12	no	2	2	2	0	0	none	N	P	21.3	21.8	N	1		2017-10-11	2015-05-11	2015-05-11	no-sex	2
630297	2014-11-24	2015-5857	00.0	0	2014-11-08	16	no	0	0	0	0			N	N	16.4	16.4	N	1	1				no-sex	1
630297	2015-04-30	2015-18994	06.0	6	2015-04-12	18	no	2	2	2	0		none	N	N	16.4	16.8	N	1	1				no-sex	2
630327	2015-05-14	2015-19142	06.0	6	2015-05-11	3	no	2	2		8	-175	none	N	N	17.3	17.8	N	1		2015-11-05	2015-11-23	2015-11-05	yes-sex	1
630327	2015-11-23	2015-35869	12.0	12	2015-11-12	11	no	2	2	2	10	18	none	N	P	17.3	18.3	N	1		2015-11-05	2015-11-23	2015-11-05	yes-sex	2
630330	2015-02-19	2015-18618	03.0	3	2015-02-12	7	no	2	2		0	-689	none	N	N	16.7	17	N	1		2017-04-01	2017-01-08	2017-01-08	no-sex	1
630330	2015-05-15	2015-19154	06.0	6	2015-05-05	10	no	2	2	2	0	-604	none	N	N	16.7	17.2	N	1		2017-04-01	2017-01-08	2017-01-08	no-sex	2
630343	2015-02-20	2015-18630	03.0	3	2015-01-26	25	no	2	2	2	5	-70	none	N	N	19	19.2	N	1		2015-05-01	2015-05-27	2015-05-01	yes-sex	1
630343	2015-05-27	2015-19202	06.0	6	2015-05-22	5	no	2	2	2	0	26	none	N	P	19	19.5	P1HSV	1		2015-05-01	2015-05-27	2015-05-01	yes-sex	2
630372	2014-12-05	2015-5873	00.0	0	2014-11-21	14	no	0	0	0	7	-1227		N	N	16.3	16.3	N	1	1	2018-05-01	2018-04-15	2018-04-15	no-sex	1
630372	2015-03-09	2015-18706	03.0	3	2015-03-04	5	no	2	2	2	8	-1133	none	N	N	16.3	16.6	N	1		2018-05-01	2018-04-15	2018-04-15	no-sex	2
630385	2015-04-15	2015-18838	03.0	3	2015-03-08	38	no	2	2	2	0	-839	none	N	N	18.7	19	N	1		2017-08-01		2017-08-01	no-sex	1
630385	2015-06-29	2015-19432	06.0	6	2015-06-21	8	no	2	2	2	0	-764	none	N	N	18.7	19.2	N	1		2017-08-01		2017-08-01	no-sex	2
630398	2015-03-04	2015-18658	03.0	3	2015-02-06	26					0	-617	none	N	N	18.1	18.3	N	1		2016-11-10	2017-10-10	2016-11-10	no-sex	1
630398	2015-05-27	2015-19210	06.0	6	2015-05-18	9	no	2	2	2	0	-533	none	N	N	18.1	18.5	N	1		2016-11-10	2017-10-10	2016-11-10	no-sex	2
630402	2015-03-22	2015-18762	03.0	3	2015-02-27	23	no	2	2	2	0		none	N	N	18.1	18.4	N	1	1				no-sex	1
630402	2015-06-26	2015-19424	06.0	6	2015-06-14	12	no	2	2	2	0		none	N	N	18.1	18.7	N	1	1				no-sex	2
630415	2014-12-11	2015-5879	00.0	0	2014-12-02	9	chlam	1	0	0	6	0		N	N	16.2	16.2	N	1	1	2015-01-01	2014-12-11	2014-12-11	yes-sex	1
630415	2015-04-14	2015-18834	03.0	3	2015-03-23	22	chlam	1	2	2	6	124	none	N	N	16.2	16.5	N	1	1	2015-01-01	2014-12-11	2014-12-11	yes-sex	2
630428	2015-03-09	2015-18714	03.0	3	2015-01-09	59	no	2	2		0	-56	none	N	N	17.7	17.9	N	1		2017-06-01	2015-05-04	2015-05-04	no-sex	1
630428	2015-05-04	2015-19050	06.0	6	2015-04-19	15	no	2	2	2	0	0	none	N	P	17.7	18.1	N	1		2017-06-01	2015-05-04	2015-05-04	no-sex	2
630444	2015-06-26	2015-19422	06.0	6	2015-06-16	10	no	2	2		0	192	none	N	N	17.7	18.2	N	1	1	2015-07-01	2014-12-16	2014-12-16	yes-sex	1
630444	2015-08-31	2015-28453	09.0	9	2015-08-19	12	no	2	2	2	0	258	none	N	N	17.7	18.4	N	1		2015-07-01	2014-12-16	2014-12-16	yes-sex	2
630457	2015-03-22	2015-18758	03.0	3	2015-03-16	6					0		none	N	N	17.2	17.4	N	1					no-sex	1
630457	2015-06-29	2015-19448	06.0	6	2015-06-16	13	no	2	2	2	0		none	N	N	17.2	17.7	N	1					no-sex	2
630460	2014-12-17	2015-5889	00.0	0	2014-12-05	12	no	0	0	0	0			N	N	16.3	16.3	N	1	1				no-sex	1
630460	2015-06-29	2015-19428	06.0	6	2015-06-20	9					0		none	N	N	16.3	16.8	N	1					no-sex	2
630486	2015-03-18	2015-18730	03.0	3	2015-03-08	10					0	-1075	none	N	N	16.2	16.5	N	1		2018-02-25		2018-02-25	no-sex	1
630486	2015-06-18	2015-19326	06.0	6	2015-06-12	6	no	2	2	2	0	-983	none	N	N	16.2	16.7	N	1		2018-02-25		2018-02-25	no-sex	2
630499	2015-03-18	2015-18734	03.0	3	2015-02-15	31					0		none	N	N	17.7	17.9	N	1					no-sex	1
630499	2015-06-18	2015-19334	06.0	6	2015-06-09	9	no	2	2	2	0		none	N	N	17.7	18.2	N	1					no-sex	2
630503	2015-04-20	2015-18866	03.0	3	2015-04-03	17					0	-469	none	N	N	16.8	17.1	N	1	1	2016-08-01		2016-08-01	no-sex	1
630503	2015-05-05	2015-19054	06.0	6	2015-04-28	7	no	2	2	2	0	-454	none	N	N	16.8	17.1	N	1	1	2016-08-01		2016-08-01	no-sex	2
630529	2015-04-28	2015-18958	03.0	3	2015-03-28	31	no	2	2		0	130	none	N	N	17.3	17.6	N	1			2014-12-19	2014-12-19	no-sex	1
630529	2015-06-17	2015-19310	06.0	6	2015-06-06	11	no	2	2	2	0	180	none	N	N	17.3	17.8	N	1			2014-12-19	2014-12-19	no-sex	2
630545	2015-04-28	2015-18954	03.0	3	2015-01-27	91					0	113	none	N	N	16.3	16.6	N	1			2015-01-05	2015-01-05	no-sex	1
630545	2015-08-17	2015-28253	06.0	6	2015-07-05	43	no	2	2	2	0	224	none	N	N	16.3	16.9	N	1			2015-01-05	2015-01-05	no-sex	2
630558	2016-01-04	2016-6973	12.0	12	2015-12-05	30	no	2	2	2	0	-25	none	N	N	17.2	18.2	N	1		2016-02-02	2016-01-29	2016-01-29	yes-sex	1
630558	2016-03-01	2016-8814	15.0	15	2016-01-29	32	no	2	2	2	0	32	none	Y	N	17.2	18.3	N	1		2016-02-02	2016-01-29	2016-01-29	yes-sex	2
630574	2015-01-29	2015-18562	00.0	0	2015-01-05	24	no	0	0	0	0	-59		N	N	19.6	19.6	N	1	1	2015-03-29	2015-04-29	2015-03-29	yes-sex	1
630574	2015-04-29	2015-18982	03.0	3	2015-03-28	32	no	2	2	2	0	31	emergency pills	N	P	19.6	19.9	N	1		2015-03-29	2015-04-29	2015-03-29	yes-sex	2
630590	2015-02-05	2015-18594	00.0	0	2014-12-31	36	no	0	0	0	0	-727		N	N	19.2	19.2	N	1	1	2017-02-01		2017-02-01	no-sex	1
630590	2015-08-21	2015-28341	06.0	6	2015-07-22	30	no	2	2	2	0	-530	none	N	N	19.2	19.7	N	1		2017-02-01		2017-02-01	no-sex	2
630604	2015-02-12	2015-18602	00.0	0	2015-01-23	20	chlam	1	0	0	8	0		N	N	19.6	19.6	N	1	1	2015-03-06	2015-02-12	2015-02-12	yes-sex	1
630604	2015-05-13	2015-19130	03.0	3	2015-05-08	5	chlam	1	2	2	4	90	none	N	N	19.6	19.9	N	1	1	2015-03-06	2015-02-12	2015-02-12	yes-sex	2
630620	2015-05-14	2015-19134	03.0	3	2015-04-27	17					0	-477	none	N	N	18.8	19.1	N	1		2016-09-02		2016-09-02	no-sex	1
630620	2015-08-06	2015-28139	06.0	6	2015-07-19	18	no	2	2	2	0	-393	none	N	N	18.8	19.3	N	1		2016-09-02		2016-09-02	no-sex	2
630646	2015-05-21	2015-19178	03.0	3	2015-05-05	16					0	-1070	none	N	N	19.4	19.6	N	1		2018-04-25		2018-04-25	no-sex	1
630646	2015-08-19	2015-28301	06.0	6	2015-08-08	11	no	2	2	2	0	-980	none	N	N	19.4	19.9	N	1		2018-04-25		2018-04-25	no-sex	2
630675	2015-02-26	2015-18646	00.0	0	2015-02-18	8	no	0	0	0	0			N	N	20.9	20.9	N	1	1				no-sex	1
630675	2015-06-02	2015-19222	03.0	3	2015-05-26	7	no	2	2	2	0		none	N	N	20.9	21.1	N	1					no-sex	2
630721	2016-02-29	2016-8762	12.0	12	2016-01-25	35	no	2	2	2	0	-47	none	N	N	18.3	19.3	N	1		2016-04-16		2016-04-16	yes-sex	1
630721	2016-04-28	2016-15824	15.0	15	2016-04-08	20	no	2	2	2	0	12	none	N	N	18.3	19.5	N	1		2016-04-16		2016-04-16	yes-sex	2
630734	2015-03-09	2015-18702	00.0	0	2015-03-03	6	no	0	0	0	0	-524		N	N	19.7	19.7	N	1	1	2016-08-14	2017-08-14	2016-08-14	no-sex	1
630734	2015-06-04	2015-19242	03.0	3	2015-05-24	11	no	2	2	2	0	-437	none	N	N	19.7	20	N	1		2016-08-14	2017-08-14	2016-08-14	no-sex	2
630747	2015-03-06	2015-18690	00.0	0	2015-02-15	19	no	0	0	0	0			N	N	20.2	20.2	N	1	1				no-sex	1
630747	2015-06-10	2015-19262	03.0	3	2015-06-04	6	no	2	2	2	0		none	N	N	20.2	20.5	N	1					no-sex	2
630750	2015-03-06	2015-18694	00.0	0	2015-02-28	6	no	0	0	0	0			N	N	18.6	18.6	N	1	1				no-sex	1
630750	2015-06-11	2015-19266	03.0	3	2015-06-03	8	no	2	2	2	0		none	N	N	18.6	18.9	N	1					no-sex	2
630763	2015-03-12	2015-18718	00.0	0	2015-02-17	23	no	0	0	0	0	-3		N	N	18.5	18.5	N	1	1	2015-03-15	2015-06-18	2015-03-15	yes-sex	1
630763	2015-06-18	2015-19346	03.0	3	2015-06-10	8	chlam	1	2	2	0	95	condoms	N	N	18.5	18.8	N	1		2015-03-15	2015-06-18	2015-03-15	yes-sex	2
630776	2015-03-12	2015-18722	00.0	0	2015-03-05	7	no	0	0	0	0		none	N	N	16.7	16.7	N	1	1				no-sex	1
630776	2015-06-18	2015-19342	03.0	3	2015-06-08	10	no	2	2	2	0		none	N	N	16.7	16.9	N	1					no-sex	2
630792	2015-03-20	2015-18746	00.0	0	2014-11-24	116	no	0	0	0	4			N	N	19.2	19.2	N	1	1				no-sex	1
630792	2015-06-18	2015-19330	03.0	3	2014-11-24	206	no	2	2	2	4		none	N	N	19.2	19.4	N	1					no-sex	2
630806	2015-03-20	2015-18742	00.0	0	2015-03-02	18	no	0	0	0	0	-469		N	N	16.3	16.3	N	1	1	2016-07-01	2017-03-09	2016-07-01	no-sex	1
630806	2015-06-25	2015-19414	03.0	3	2015-06-18	7	no	2	2	2	0	-372	none	N	N	16.3	16.6	N	1		2016-07-01	2017-03-09	2016-07-01	no-sex	2
630835	2015-04-08	2015-18770	00.0	0	2015-03-26	13	no	0	0	0	0	-999	none	N	N	18	18	N	1	1	2018-01-01	2018-03-23	2018-01-01	no-sex	1
630835	2015-07-07	2015-27891	03.0	3	2015-06-26	11	no	2	2	2	0	-909	none	N	N	18	18.3	N	1		2018-01-01	2018-03-23	2018-01-01	no-sex	2
630848	2015-04-08	2015-18790	00.0	0	2015-03-29	10	no	0	0	0	0	-89	none	N	N	19	19	N	0	0	2015-07-06	2016-01-04	2015-07-06	yes-sex	1
630848	2015-10-05	2015-35389	06.0	6	2015-09-05	30	no	2	2	2	0	91	none	N	N	19	19.5	N	0		2015-07-06	2016-01-04	2015-07-06	yes-sex	2
630851	2016-01-21	2016-7213	09.0	9	2016-01-01	20	no	2	2		0	-72	none	N	N	19.2	20	N	0		2016-04-02	2018-09-19	2016-04-02	yes-sex	1
630851	2016-04-11	2016-9309	12.0	12	2016-04-04	7	no	2	2	2	0	9	condoms	N	N	19.2	20.2	N	0		2016-04-02	2018-09-19	2016-04-02	yes-sex	2
630864	2015-04-08	2015-18798	00.0	0	2015-04-05	3	no	0	0	0	3	-63	none	N	N	18	18	N	1	1	2015-06-10	2018-03-21	2015-06-10	yes-sex	1
630864	2015-07-07	2015-27895	03.0	3	2015-06-10	27	no	2	2	2	8	27	emergency pills	N	N	18	18.3	N	1		2015-06-10	2018-03-21	2015-06-10	yes-sex	2
630880	2015-04-10	2015-18814	00.0	0	2015-04-03	7	no	0	0	0	0	-111	none	N	N	20.2	20.2	N	1	1	2015-07-30	2015-08-03	2015-07-30	yes-sex	1
630880	2015-08-03	2015-28067	03.0	3	2015-07-28	6	no	2	2	2	0	4	oral bcp	N	P	20.2	20.5	N	1		2015-07-30	2015-08-03	2015-07-30	yes-sex	2
630910	2015-04-16	2015-18842	00.0	0	2015-03-21	26	no	0	0	0	0	-995	none	N	N	16	16	N	1	1	2018-01-05		2018-01-05	no-sex	1
630910	2015-08-18	2015-28277	03.0	3	2015-07-27	22	no	2	2	2	0	-871	none	N	N	16	16.4	N	1		2018-01-05		2018-01-05	no-sex	2
630923	2015-04-20	2015-18862	00.0	0	2015-04-14	6	no	0	0	0	0	-879	none	N	N	19.1	19.1	N	1	1	2017-09-15	2018-09-18	2017-09-15	no-sex	1
630923	2015-08-18	2015-28273	03.0	3	2015-07-28	21	no	2	2	2	0	-759	none	N	N	19.1	19.5	N	1		2017-09-15	2018-09-18	2017-09-15	no-sex	2
630949	2015-04-17	2015-18850	00.0	0	2015-03-19	29	no	0	0	0	0	-280	none	N	N	17.3	17.3	N	1	1	2017-10-15	2016-01-22	2016-01-22	no-sex	1
630949	2015-08-11	2015-28205	03.0	3	2015-08-03	8	no	2	2	2	4	-164	none	N	N	17.3	17.6	N	1		2017-10-15	2016-01-22	2016-01-22	no-sex	2
630952	2015-04-17	2015-18854	00.0	0	2015-03-25	23	no	0	0	0	0	-686	none	N	N	16.6	16.6	N	1	1	2018-11-10	2017-03-03	2017-03-03	no-sex	1
630952	2015-08-12	2015-28233	03.0	3	2015-07-22	21	no	2	2	2	0	-569	none	N	N	16.6	16.9	N	1		2018-11-10	2017-03-03	2017-03-03	no-sex	2
630965	2015-04-20	2015-18870	00.0	0	2015-04-15	5	no	0	0	0	0	-521	none	N	N	18.1	18.1	N	1	1	2016-09-22	2017-05-15	2016-09-22	no-sex	1
630965	2015-08-07	2015-28167	03.0	3	2015-07-19	19	no	2	2	2	0	-412	none	N	N	18.1	18.4	N	1		2016-09-22	2017-05-15	2016-09-22	no-sex	2
630978	2015-04-21	2015-18874	00.0	0	2015-04-10	11	no	0	0	0	0	0	none	N	P	19.3	19.3	N	1	1		2015-04-21	2015-04-21	no-sex	1
630978	2015-08-26	2015-28409	03.0	3	2015-08-08	18	no	2	2	2	0	127	none	N	N	19.3	19.7	N	1			2015-04-21	2015-04-21	no-sex-two records	2
630978	2015-08-26	2015-28410	03.0	3	2015-08-08	18	no	2	2	2	0	127	none	N	N	19.3	19.7	N	1			2015-04-21	2015-04-21	no-sex-two records	2
630981	2015-04-21	2015-18878	00.0	0	2015-04-06	15	no	0	0	0	0		none	N	N	18.8	18.8	N	1	1				no-sex	1
630981	2015-08-26	2015-28401	03.0	3	2015-08-06	20	no	2	2	2	0		none	N	N	18.8	19.1	N	1					no-sex	2
631008	2015-04-22	2015-18898	00.0	0	2015-02-02	79	no	0	0	0	0	-901	none	N	N	19.6	19.6	N	1	1	2017-10-09	2019-08-19	2017-10-09	no-sex	1
631008	2015-07-21	2015-27967	03.0	3	2015-06-24	27	no	2	2	2	0	-811	none	N	N	19.6	19.8	N	1		2017-10-09	2019-08-19	2017-10-09	no-sex	2
631183	2015-08-26	2015-28381	03.0	3	2015-08-16	10					0	-52	none	N	N	18.4	18.7	N	1		2015-10-17	2015-11-02	2015-10-17	yes-sex	1
631183	2015-11-02	2015-35633	06.0	6	2015-10-19	14	no	2	2	2	0	16	none	N	P	18.4	18.9	N	1		2015-10-17	2015-11-02	2015-10-17	yes-sex	2
631196	2015-08-11	2015-28201	03.0	3	2015-08-07	4	no	2	2		0	105	none	N	N	18.7	19	N	1		2015-10-01	2015-04-28	2015-04-28	yes-sex	1
631196	2015-11-16	2015-35720	06.0	6	2015-09-29	48	no	2	2	2	0	202	none	N	N	18.7	19.3	N	1		2015-10-01	2015-04-28	2015-04-28	yes-sex	2
631271	2015-04-30	2015-19010	00.0	0	2015-04-26	4	no	0	0	0	0	-93	none	N	N	18.9	18.9	N	1	1	2015-08-01		2015-08-01	yes-sex	1
631271	2015-08-07	2015-28143	03.0	3	2015-07-21	17	no	2	2	2	0	6	none	N	N	18.9	19.2	N	1		2015-08-01		2015-08-01	yes-sex	2
631343	2015-11-17	2015-35763	06.0	6	2015-11-13	4					0		none	N	N	18.7	19.2	N	1					no-sex	1
631343	2016-01-23	2016-7263	09.0	9	2016-01-03	20	no	2	2	2	0		none	N	N	18.7	19.4	N	1					no-sex	2
631372	2016-01-29	2016-7319	09.0	9	2016-01-20	9					0	-417	none	N	N	19.2	19.9	N	1		2017-03-21	2018-02-14	2017-03-21	no-sex	1
631372	2016-04-29	2016-15844	12.0	12	2016-04-24	5	no	2	2	2	0	-326	none	N	N	19.2	20.2	N	1		2017-03-21	2018-02-14	2017-03-21	no-sex	2
631431	2015-08-06	2015-28127	03.0	3	2015-07-25	12					0	-1152	none	N	N	18.9	19.2	N	1		2018-10-01		2018-10-01	no-sex	1
631431	2015-11-24	2015-35892	06.0	6	2015-11-07	17	no	2	2	2	0	-1042	none	N	N	18.9	19.5	N	1		2018-10-01		2018-10-01	no-sex	2
631532	2015-08-18	2015-28285	03.0	3	2015-07-28	21	chlam	1	2		0	90	none	N	P	19.3	19.5	N	1		2015-09-15	2015-05-20	2015-05-20	yes-sex	1
631532	2015-11-16	2015-35724	06.0	6	2015-10-28	19	no	2	2	2	8	180	condoms	N	P	19.3	19.8	N	1		2015-09-15	2015-05-20	2015-05-20	yes-sex	2
631574	2015-05-22	2015-19198	00.0	0	2015-05-02	20	no	0	0	0	0	-78	none	N	N	18.1	18.1	N	1	1	2015-08-08		2015-08-08	yes-sex	1
631574	2015-09-02	2015-28465	03.0	3	2015-08-10	23	no	2	2	2	0	25	none	N	N	18.1	18.4	N	1		2015-08-08		2015-08-08	yes-sex	2
631763	2015-09-18	2015-35257	03.0	3	2015-09-11	7					0	0	none	N	N	19.7	19.9	N	1		2015-09-18		2015-09-18	yes-sex	1
631763	2015-12-18	2016-6877	06.0	6	2015-12-10	8	no	2	2	2	4	91	none	N	N	19.7	20.2	N	1		2015-09-18		2015-09-18	yes-sex	2
631789	2015-09-14	2015-28540	03.0	3	2015-09-07	7	no	2	2		0	-64	none	N	N	20.9	21.1	N	1		2015-11-17	2018-09-17	2015-11-17	yes-sex	1
631789	2015-12-14	2015-36320	06.0	6	2015-11-25	19	no	2	2	2	1	27	none	N	N	20.9	21.4	N	1		2015-11-17	2018-09-17	2015-11-17	yes-sex	2
631835	2015-09-17	2015-35245	03.0	3	2015-08-10	38					0	-54	none	N	N	19.4	19.7	N	1		2015-12-01	2015-11-10	2015-11-10	yes-sex	1
631835	2016-01-12	2016-7109	06.0	6	2015-11-10	63	no	2	2	2	8	63	none	Y	N	19.4	20	N	1		2015-12-01	2015-11-10	2015-11-10	yes-sex	2
631851	2015-09-21	2015-35265	03.0	3	2015-09-18	3					5	-89	none	N	N	19.5	19.7	N	1		2015-12-19		2015-12-19	yes-sex	1
631851	2016-03-18	2016-9026	09.0	9	2016-03-05	13	no	2	2	2	0	90	emergency pills	N	N	19.5	20.2	N	1		2015-12-19		2015-12-19	yes-sex	2
632008	2015-12-11	2015-36300	06.0	6	2015-11-22	19	no	2	2	2	0	-81	none	N	N	16	16.4	N	1		2016-03-01	2018-02-12	2016-03-01	yes-sex	1
632008	2016-03-29	2016-9086	09.0	9	2016-03-19	10	no	2	2	2	0	28	none	N	N	16	16.7	N	1		2016-03-01	2018-02-12	2016-03-01	yes-sex	2
632011	2015-07-02	2015-19460	00.0	0	2015-06-19	13	no	0	0	0	0	-61	none	N	N	18.1	18.1	N	1	1	2015-09-01	2015-10-06	2015-09-01	yes-sex	1
632011	2015-10-06	2015-35397	03.0	3	2015-09-07	29	no	2	2	2	0	35	condoms	N	P	18.1	18.4	N	1		2015-09-01	2015-10-06	2015-09-01	yes-sex	2
632095	2015-10-07	2015-35417	03.0	3	2015-09-09	28					0	-36	none	N	N	18.6	18.8	N	1		2015-11-20	2015-11-12	2015-11-12	yes-sex	1
632095	2016-01-07	2016-7057	06.0	6	2015-11-12	56	no	2	2	2	0	56	condoms	Y	N	18.6	19.1	N	1		2015-11-20	2015-11-12	2015-11-12	yes-sex	2
632125	2015-07-13	2015-27931	00.0	0	2015-07-06	7	no	0	0	0	0	-50	none	N	N	17.7	17.7	N	1	1	2015-09-01	2019-03-12	2015-09-01	yes-sex	1
632125	2015-10-19	2015-35513	03.0	3	2015-10-12	7	no	2	2	2	0	48	none	N	N	17.7	18	N	1		2015-09-01	2019-03-12	2015-09-01	yes-sex	2
632343	2015-08-05	2015-28107	00.0	0	2015-07-10	26	no	0	0	0	0	0	none	N	N	18.4	18.4	P2HSV	1	1	2015-08-28	2015-08-05	2015-08-05	seroconverter	1
632343	2015-12-22	2016-6933	03.0	3	2015-12-12	10	no	2	2	2	8	139	none	N	N	18.4	18.8	N	1	3	2015-08-28	2015-08-05	2015-08-05	seroconverter	2
632343	2016-02-03	2016-7363	06.0	6	2016-01-13	21	no	2	2		10	182	none	N	N	18.4	18.9	N	1	3	2015-08-28	2015-08-05	2015-08-05	seroconverter	3
632343	2016-05-24	2016-16072	09.0	9	2016-05-13	11	no	2	2	2	4	293	condoms	N	N	18.4	19.2	N	1	3	2015-08-28	2015-08-05	2015-08-05	seroconverter	4
632428	2015-11-17	2015-35781	03.0	3	2015-11-10	7					0	-37	none	N	N	17.6	17.8	N	1		2015-12-24	2016-02-15	2015-12-24	yes-sex	1
632428	2016-02-15	2016-7495	06.0	6	2016-02-10	5	no	2	2	2	0	53	none	N	P	17.6	18	N	1		2015-12-24	2016-02-15	2015-12-24	yes-sex	2
632516	2015-11-23	2015-35865	03.0	3	2015-10-29	25	no	2	2		0	-70	none	N	N	18.9	19.1	N	1		2016-02-01	2016-08-26	2016-02-01	yes-sex	1
632516	2016-02-29	2016-8770	06.0	6	2016-02-12	17	no	2	2	2	0	28	none	N	N	18.9	19.4	N	1		2016-02-01	2016-08-26	2016-02-01	yes-sex	2
632604	2016-02-24	2016-7579	06.0	6	2016-02-13	11	no	2	2		0	-81	none	N	N	20.6	21.1	N	1		2016-05-15	2017-01-15	2016-05-15	yes-sex	1
632604	2016-05-30	2016-16140	09.0	9	2016-05-23	7	no	2	2	2	0	15	none	N	N	20.6	21.3	N	1		2016-05-15	2017-01-15	2016-05-15	yes-sex	2
632763	2015-09-28	2015-35313	00.0	0	2015-09-15	13	no	0	0	0	0	0	none	N	P	19.3	19.3	N	1	1	2015-11-20	2015-09-28	2015-09-28	yes-sex	1
632763	2015-12-18	2016-6897	03.0	3	2015-12-03	15	no	2	2	2	0	81	emergency pills	N	N	19.3	19.6	N	1		2015-11-20	2015-09-28	2015-09-28	yes-sex	2
632789	2016-01-13	2016-7125	03.0	3	2016-01-04	9	no	2	2		0	103	none	N	N	19.3	19.6	N	1		2016-03-14	2015-10-02	2015-10-02	yes-sex	1
632789	2016-04-08	2016-9228	06.0	6	2016-03-28	11	no	2	2	2	0	189	none	N	N	19.3	19.8	N	1		2016-03-14	2015-10-02	2015-10-02	yes-sex	2
632822	2015-10-07	2015-35405	00.0	0	2015-10-03	4	no	0	0	0	4	-49	none	N	N	18.3	18.3	N	1	1	2015-11-25	2018-01-17	2015-11-25	yes-sex	1
632822	2016-01-07	2016-7041	03.0	3	2015-12-25	13	no	2	2	2	4	43	condoms	N	N	18.3	18.6	N	1		2015-11-25	2018-01-17	2015-11-25	yes-sex	2
632848	2015-10-08	2015-35425	00.0	0	2015-09-15	23	chlam	1	0	0	0	240	none	N	N	20	20	N	1	1	2015-02-10	2015-10-08	2015-02-10	seroconverter	1
632848	2016-01-06	2016-7029	03.0	3	2015-12-25	12	no	2	2		8	330	none	N	N	20	20.3	N	1	1	2015-02-10	2015-10-08	2015-02-10	seroconverter	2
632848	2016-04-05	2016-9164	06.0	6	2016-04-01	4	gon chlam	1	1	2	10	420	none	N	N	20	20.5	N	1	1	2015-02-10	2015-10-08	2015-02-10	seroconverter	3
632848	2016-07-05	2016-16564	09.0	9	2016-07-01	4	no	2	2	2	0	511	none	N	N	20	20.8	N	1	1	2015-02-10	2015-10-08	2015-02-10	seroconverter	4
633024	2015-11-23	2015-35861	00.0	0	2015-11-18	5	no	0	0	0	0	-83	none	N	N	16	16	N	1	1	2016-02-14	2019-07-14	2016-02-14	yes-sex	1
633024	2016-02-29	2016-8718	03.0	3	2016-02-19	10	no	2	2	2	0	15	condoms	N	N	16	16.3	N	1		2016-02-14	2019-07-14	2016-02-14	yes-sex	2
633138	2015-11-30	2015-36016	00.0	0	2015-11-22	8	no	0	0	0	0	-82	none	N	N	19.5	19.5	N	1	1	2016-02-20	2016-05-27	2016-02-20	yes-sex	1
633138	2016-02-29	2016-8730	03.0	3	2016-02-13	16	no	2	2	2	0	9	none	N	N	19.5	19.8	N	1		2016-02-20	2016-05-27	2016-02-20	yes-sex	2
633239	2015-12-03	2015-36114	00.0	0	2015-11-10	23	no	0	0	0	0	-43	none	N	N	19	19	N	1	1	2016-01-15		2016-01-15	yes-sex	1
633239	2016-03-02	2016-8826	03.0	3	2016-02-20	11	no	2	2	2	0	47	none	N	N	19	19.2	N	1		2016-01-15		2016-01-15	yes-sex	2
633242	2016-03-03	2016-8850	03.0	3	2016-02-22	10	chlam	1	2	2	0	0	none	N	N	18.7	18.9	N	1		2016-04-01	2016-03-03	2016-03-03	yes-sex	1
633242	2016-06-02	2016-16176	06.0	6	2016-05-11	22	chlam	1	2	2	0	91	condoms	N	N	18.7	19.2	N	1		2016-04-01	2016-03-03	2016-03-03	yes-sex	2
633271	2015-12-08	2015-36158	00.0	0	2015-11-09	29	no	0	0	0	0	251	none	N	N	19.2	19.2	N	1	1	2015-04-01	2016-01-25	2015-04-01	seroconverter	1
633271	2016-01-25	2016-7279	03.0	3	2016-01-09	16	no	2	2	2	0	299	emergency pills condoms	N	N	19.2	19.3	P2HSV	1	1	2015-04-01	2016-01-25	2015-04-01	seroconverter	2
633271	2016-06-03	2016-16200	06.0	6	2016-04-11	53	no	2	2	2	9	429	Implant	N	N	19.2	19.7	N	1	3	2015-04-01	2016-01-25	2015-04-01	seroconverter	3
633284	2015-12-08	2015-36166	00.0	0	2015-11-23	15	no	0	0	0	0	-210	none	N	N	20.1	20.1	N	1	1	2016-07-05		2016-07-05	yes-sex	1
633284	2016-07-11	2016-16620	06.0	6	2016-06-21	20	no	2	2	2	0	6	none	N		20.1	20.7	N	1		2016-07-05		2016-07-05	yes-sex	2
633297	2015-12-08	2015-36170	00.0	0	2015-11-08	30	no	0	0	0	0	-19	none	N	N	19.4	19.4	N	1	1	2016-01-01	2015-12-27	2015-12-27	yes-sex	1
633297	2016-03-07	2016-8886	03.0	3	2015-12-27	71	no	2	2	2	0	71	none	Y	N	19.4	19.6	N	1		2016-01-01	2015-12-27	2015-12-27	yes-sex	2
633369	2015-12-10	2015-36232	00.0	0	2015-12-01	9	no	0	0	0	0	-130	none	N	N	17.3	17.3	N	1	1	2016-04-18		2016-04-18	yes-sex	1
633369	2016-05-03	2016-15864	06.0	6	2016-04-25	8	no	2	2	2	0	15	none	N	N	17.3	17.7	N	1		2016-04-18		2016-04-18	yes-sex	2
633499	2016-03-15	2016-8974	03.0	3	2016-03-08	7	trich	2	2	1	0	0	none	N	N	18.6	18.9	N		1	2016-04-01	2016-03-15	2016-03-15	yes-sex	1
633499	2016-06-13	2016-16300	06.0	6	2016-05-01	43	no	2	2	2	0	90	condoms	N	N	18.6	19.1	N			2016-04-01	2016-03-15	2016-03-15	yes-sex	2
633587	2016-03-16	2016-9002	03.0	3	2016-02-24	21					0	-81	none	N	N	19.3	19.6	N	1		2016-06-05		2016-06-05	yes-sex	1
633587	2016-06-14	2016-16312	06.0	6	2016-05-16	29	no	2	2	2	0	9	condoms	N	N	19.3	19.8	N	1		2016-06-05		2016-06-05	yes-sex	2
