# Supplementary material for: Starting to have sexual intercourse is associated with increases in cervicovaginal immune mediators in young women: a prospective study and meta-analysis
Source: eLife journal article supplement (doi:10.7554/elife.78565), 2022-10-06
Supplement: code1 [file 2021-05-13_TotalProtein.xlsx]

## Sheet: metadata
PatientId	SpId	CollectionDate	Code	Box	Concentration mg/mL	DateRun	Plate	Notes	Rerun Conc. CV>20	Date Rerun	Plate Rerun
630082	2015-5817	2014-10-03	U001		0.368	2021-04-07	1
630297	2015-5857	2014-11-24	U002	3	0.58	2021-04-14	2	Rerun CV =80.6	0.238	2021-04-29	7
630372	2015-5873	2014-12-05	U003		0.133	2021-04-14	2
630415	2015-5879	2014-12-11	U004	5	0.322	2021-04-14	2
630460	2015-5889	2014-12-17	U005	5	0.208	2021-04-14	2
630125	2015-18526	2015-01-08	U006		0.175	2021-04-07	1
630082	2015-18578	2015-01-20	U007		0.401	2021-04-07	1
630574	2015-18562	2015-01-29	U008	7	0.825	2021-04-14	3	Rerun CV=20.4	0.595	2021-04-29	7	Rerun CV = 15.7
630213	2015-18586	2015-02-02	U009		0.304	2021-04-07	1
630242	2015-18574	2015-02-04	U010		1.619	2021-04-14	2
630590	2015-18594	2015-02-05	U011	7	0.019	2021-04-14	3	Rerun CV=35.1	0.092	2021-04-21	6
630604	2015-18602	2015-02-12	U012	7	0.557	2021-04-14	3	Rerun CV=24.4	0.511	2021-04-21	6
630330	2015-18618	2015-02-19	U013	4	0.248	2021-04-14	2
630343	2015-18630	2015-02-20	U014	4	0.321	2021-04-14	2
630675	2015-18646	2015-02-26	U015	8	RANGE?	2021-04-14	3	Rerun	0.076	2021-04-21	6
630398	2015-18658	2015-03-04	U016	4	0.469	2021-04-14	2
630066	2015-18674	2015-03-06	U017	3	0.346	2021-04-14	2
630747	2015-18690	2015-03-06	U018	8	0.403	2021-04-14	3
630750	2015-18694	2015-03-06	U019	8	0.134	2021-04-14	3
630372	2015-18706	2015-03-09	U020	4	0.512	2021-04-14	2
630428	2015-18714	2015-03-09	U021	5	0.362	2021-04-14	2
630734	2015-18702	2015-03-09	U022	8	0.582	2021-04-14	3
630763	2015-18718	2015-03-12	U023	9	0.6	2021-04-14	3
630776	2015-18722	2015-03-12	U024	9	0.419	2021-04-14	3
630486	2015-18730	2015-03-18	U025	6	0.723	2021-04-14	2
630499	2015-18734	2015-03-18	U026	6	0.277	2021-04-14	3
630792	2015-18746	2015-03-20	U027	9	0.152	2021-04-14	3	Rerun CV= 26.1	0.189	2021-04-21	6
630806	2015-18742	2015-03-20	U028	9	0.658	2021-04-14	3
630402	2015-18762	2015-03-22	U029	4	0.657	2021-04-14	2
630457	2015-18758	2015-03-22	U030	5	1.037	2021-04-14	2
630109	2015-18782	2015-04-08	U031		0.552	2021-04-07	1
630125	2015-18766	2015-04-08	U032		0.444	2021-04-07	1
630138	2015-18774	2015-04-08	U033		0.906	2021-04-07	1
630835	2015-18770	2015-04-08	U034	9	0.837	2021-04-14	3
630848	2015-18790	2015-04-08	U035	10	0.334	2021-04-20	4
630864	2015-18798	2015-04-08	U036	10	0.551	2021-04-20	4	Rerun CV = 27.3	0.619	2021-04-21	6
630880	2015-18814	2015-04-10	U037	10	0.169	2021-04-20	4	Rerun CV= 26.8	0.233	2021-04-21	6
630415	2015-18834	2015-04-14	U038	5	0.384	2021-04-14	2
630385	2015-18838	2015-04-15	U039		0.183	2021-04-14	2
630910	2015-18842	2015-04-16	U040	10	0.426	2021-04-20	4
630037	2015-18846	2015-04-17	U041	3	0.166	2021-04-14	2
630949	2015-18850	2015-04-17	U042	11	0.121	2021-04-20	4	Rerun CV = 26.6	0.141	2021-04-21	6
630952	2015-18854	2015-04-17	U043	10	0.591	2021-04-20	4
630503	2015-18866	2015-04-20	U044	6	0.617	2021-04-14	3
630923	2015-18862	2015-04-20	U045	11	0.265	2021-04-20	4	Rerun CV = 23.1	0.269	2021-04-21	6
630965	2015-18870	2015-04-20	U046	10	0.387	2021-04-20	4
630978	2015-18874	2015-04-21	U047	10	1.011	2021-04-20	4
630981	2015-18878	2015-04-21	U048	11	0.044	2021-04-20	4	Rerun CV = 21.1	0.057	2021-04-21	6
631008	2015-18898	2015-04-22	U049	12	0.258	2021-04-20	4
630529	2015-18958	2015-04-28	U050	6	0.849	2021-04-14	3
630545	2015-18954	2015-04-28	U051	6	0.712	2021-04-14	3
630574	2015-18982	2015-04-29	U052	7	0.48	2021-04-14	3
630297	2015-18994	2015-04-30	U053	2	0.344	2021-04-14	2	Rerun CV=35.7	0.276	2021-04-21	6
631271	2015-19010	2015-04-30	U054	12	0.642	2021-04-20	4
630428	2015-19050	2015-05-04	U055	5	0.78	2021-04-14	2
630503	2015-19054	2015-05-05	U056	6	0.354	2021-04-14	3
630242	2015-19090	2015-05-11	U057		0.914	2021-04-14	2
630196	2015-19106	2015-05-12	U058		0.433	2021-04-07	1
630604	2015-19130	2015-05-13	U059	7	0.164	2021-04-14	3
630327	2015-19142	2015-05-14	U060		0.879	2021-04-14	2
630620	2015-19134	2015-05-14	U061	7	0.378	2021-04-14	3
630330	2015-19154	2015-05-15	U062	4	0.197	2021-04-14	2
630183	2015-19174	2015-05-20	U063		0.866	2021-04-07	1
630646	2015-19178	2015-05-21	U064	8	1.025	2021-04-14	3
631574	2015-19198	2015-05-22	U065	13	0.602	2021-04-29	7
630343	2015-19202	2015-05-27	U066	4	0.85	2021-04-14	2
630398	2015-19210	2015-05-27	U067	4	0.4	2021-04-14	2
630053	2015-19218	2015-06-02	U068	18	5.876	2021-04-29	7	Deep Red Sample
630066	2015-19226	2015-06-02	U069	3	0.978	2021-04-14	2
630675	2015-19222	2015-06-02	U070	8	0.41	2021-04-14	3
630734	2015-19242	2015-06-04	U071	8	0.515	2021-04-14	3
630747	2015-19262	2015-06-10	U072	8	0.343	2021-04-14	3
630750	2015-19266	2015-06-11	U073	9	0.374	2021-04-14	3
630079	2015-19306	2015-06-16	U074	3	0.77	2021-04-14	2
630529	2015-19310	2015-06-17	U075	6	0.536	2021-04-14	3
630486	2015-19326	2015-06-18	U076	6	0.87	2021-04-14	3
630499	2015-19334	2015-06-18	U077	6	1.031	2021-04-14	3
630763	2015-19346	2015-06-18	U078	9	0.151	2021-04-14	3
630776	2015-19342	2015-06-18	U079	9	0.567	2021-04-14	3
630792	2015-19330	2015-06-18	U080	9	0.036	2021-04-14	3
630806	2015-19414	2015-06-25	U081	9	0.658	2021-04-14	3
630402	2015-19424	2015-06-26	U082	5	1.597	2021-04-14	2
630444	2015-19422	2015-06-26	U083	5	0.528	2021-04-14	2
630385	2015-19432	2015-06-29	U084	4	0.106	2021-04-14	2
630457	2015-19448	2015-06-29	U085	5	0.796	2021-04-14	2
630460	2015-19428	2015-06-29	U086	5	0.19	2021-04-14	2
632011	2015-19460	2015-07-02	U087	14	0.188	2021-04-21	5
630835	2015-27891	2015-07-07	U088	9	0.635	2021-04-20	4
630864	2015-27895	2015-07-07	U089	10	0.382	2021-04-20	4	Rerun CV = 106.3	Rerun 1: 0.094	2021-04-21	6	Rerun 2: Concetration: 0.085, Plate 7, 4/29/21, use this concentration CV is 13.9 vs ~22 in plate 6 rerun
632125	2015-27931	2015-07-13	U090	15	0.3	2021-04-21	5
630138	2015-27939	2015-07-15	U091		0.427	2021-04-07	1
630213	2015-27959	2015-07-21	U092		0.472	2021-04-14	2
631008	2015-27967	2015-07-21	U093	12	0.418	2021-04-20	4
630196	2015-28059	2015-07-31	U094		0.427	2021-04-07	1
630200	2015-28055	2015-07-31	U095		0.65	2021-04-07	1
630880	2015-28067	2015-08-03	U096	10	0.698	2021-04-20	4
630183	2015-28095	2015-08-04	U097		0.503	2021-04-07	1
632343	2015-28107	2015-08-05	U098	15	0.915	2021-04-21	5
630620	2015-28139	2015-08-06	U099	7	0.367	2021-04-14	3
631431	2015-28127	2015-08-06	U100	13	0.783	2021-04-20	4
630965	2015-28167	2015-08-07	U101	11	1.163	2021-04-20	4
631271	2015-28143	2015-08-07	U102	12	0.589	2021-04-20	4	Rerun CV = 21.6	0.611	2021-04-29	7	CV 20.3	used averaged concentration between runs 1 and 2 (because similar CVs): 0.60
630949	2015-28205	2015-08-11	U103	10	0.174	2021-04-20	4
631196	2015-28201	2015-08-11	U104	12	0.309	2021-04-20	4
630952	2015-28233	2015-08-12	U105	11 - Gone
630545	2015-28253	2015-08-17	U106	6	0.13	2021-04-14	3	Rerun CV=31	0.119	2021-04-21	6
630040	2015-28257	2015-08-18	U107	3	0.517	2021-04-14	2
630053	2015-28261	2015-08-18	U108	3	0.457	2021-04-14	2
630910	2015-28277	2015-08-18	U109	10	0.228	2021-04-20	4
630923	2015-28273	2015-08-18	U110	10	0.286	2021-04-20	4
631532	2015-28285	2015-08-18	U111	13	0.157	2021-04-20	4
630646	2015-28301	2015-08-19	U112	8	0.613	2021-04-14	3
630590	2015-28341	2015-08-21	U113	7	0.524	2021-04-14	3
630024	2015-28345	2015-08-24	U114	3	0.595	2021-04-14	2
630978	2015-28409	2015-08-26	U115	Gone	0.634	2021-04-29	7	No replicate - Viscous sample
630981	2015-28401	2015-08-26	U116	12	0.077	2021-04-20	4
631183	2015-28381	2015-08-26	U117	12	0.225	2021-04-20	4
630444	2015-28453	2015-08-31	U118	5	0.276	2021-04-14	2
631574	2015-28465	2015-09-02	U119	13	1.044	2021-04-20	4
630037	2015-28514	2015-09-09	U120	3	0.304	2021-04-14	2
631789	2015-28540	2015-09-14	U121	14	0.272	2021-04-21	5
630079	2015-28560	2015-09-15	U122		0.328	2021-04-07	1
631835	2015-35245	2015-09-17	U123	14	0.297	2021-04-21	5
631763	2015-35257	2015-09-18	U124	13	0.616	2021-04-20	4
631851	2015-35265	2015-09-21	U125	18	0.679	2021-04-29
632763	2015-35313	2015-09-28	U126	16	0.505	2021-04-21	5
630109	2015-35353	2015-09-30	U127		0.545	2021-04-07	1
630848	2015-35389	2015-10-05	U128	10	0.671	2021-04-20	4
632011	2015-35397	2015-10-06	U129	14	0.358	2021-04-21	5
632095	2015-35417	2015-10-07	U130	14	0.919	2021-04-21	5
632822	2015-35405	2015-10-07	U131	16	0.19	2021-04-21	5	Rerun CV= 22.4	0.194	2021-04-21	6
632848	2015-35425	2015-10-08	U132	16	0.252	2021-04-21	5	Rerun CV= 37.5	0.191	2021-04-21	6
632125	2015-35513	2015-10-19	U133	15	0.191	2021-04-21	5
631183	2015-35633	2015-11-02	U134	12	1.063	2021-04-20	4
631196	2015-35720	2015-11-16	U135	12	0.537	2021-04-20	4
631532	2015-35724	2015-11-16	U136	13	0.46	2021-04-20	4
631343	2015-35763	2015-11-17	U137	12	0.379	2021-04-20	4	Rerun CV = 26.4	0.398	2021-04-21	6
632428	2015-35781	2015-11-17	U138	15	0.328	2021-04-21	5
630327	2015-35869	2015-11-23	U139		0.334	2021-04-14	2
632516	2015-35865	2015-11-23	U140	15	0.25	2021-04-21	5
633024	2015-35861	2015-11-23	U141	17	0.167	2021-04-21	5
630200	2015-35928	2015-11-24	U142		0.851	2021-04-07	1
631431	2015-35892	2015-11-24	U143	13	0.862	2021-04-20	4	Rerun CV = 37.4	0.926	2021-04-21	6
630024	2015-36004	2015-11-27	U144	3	0.766	2021-04-14	2
633138	2015-36016	2015-11-30	U145	17	0.128	2021-04-21	5
633239	2015-36114	2015-12-03	U146	17	0.033	2021-04-21	5	Rerun CV= 70.3	0.084	2021-04-21	6
633271	2015-36158	2015-12-08	U147	17	0.661	2021-04-21	6
633284	2015-36166	2015-12-08	U148	17	0.04	2021-04-21	6
633297	2015-36170	2015-12-08	U149	18	0.287	2021-04-21	6
633369	2015-36232	2015-12-10	U150	18	0.179	2021-04-21	6
630040	2015-36272	2015-12-11	U151	3	0.556	2021-04-14	2
632008	2015-36300	2015-12-11	U152	14	0.039	2021-04-21	5
631789	2015-36320	2015-12-14	U153	14	0.561	2021-04-21	5
631763	2016-6877	2015-12-18	U154	13	0.176	2021-04-20	4
632763	2016-6897	2015-12-18	U155	16	0.51	2021-04-21	5
632343	2016-6933	2015-12-22	U156	15	0.484	2021-04-21	5
630558	2016-6973	2016-01-04	U157	7	0.633	2021-04-14	3
632848	2016-7029	2016-01-06	U158	16	0.324	2021-04-21	5
632095	2016-7057	2016-01-07	U159	14	0.763	2021-04-21	5
632822	2016-7041	2016-01-07	U160	16	0.472	2021-04-21	5
631835	2016-7109	2016-01-12	U161	14	0.54	2021-04-29	7
632789	2016-7125	2016-01-13	U162	16	0.299	2021-04-21	5
630851	2016-7213	2016-01-21	U163	10	0.517	2021-04-20	4
631343	2016-7263	2016-01-23	U164	13	0.29	2021-04-20	4
633271	2016-7279	2016-01-25	U165	17	1.108	2021-04-21	6
631372	2016-7319	2016-01-29	U166	13	0.903	2021-04-20	4
632343	2016-7363	2016-02-03	U167	15	0.855	2021-04-21	5
632428	2016-7495	2016-02-15	U168	15	0.202	2021-04-21	5
632604	2016-7579	2016-02-24	U169	15	0.303	2021-04-21	5
630721	2016-8762	2016-02-29	U170	8	0.207	2021-04-14	3
632516	2016-8770	2016-02-29	U171	15	1.006	2021-04-21	5
633024	2016-8718	2016-02-29	U172	17	0.28	2021-04-21	5
633138	2016-8730	2016-02-29	U173	17	0.439	2021-04-21	5
630558	2016-8814	2016-03-01	U174	7?	0.23	2021-04-14	3
633239	2016-8826	2016-03-02	U175	17	0.046	2021-04-21	5	Rerun CV= 26.4	0.075	2021-04-21	6
633242	2016-8850	2016-03-03	U176	17	0.308	2021-04-21	5
633297	2016-8886	2016-03-07	U177	18	0.254	2021-04-21	6
633499	2016-8974	2016-03-15	U178	18	0.463	2021-04-21	6
633587	2016-9002	2016-03-16	U179	18	0.5	2021-04-21	6
631851	2016-9026	2016-03-18	U180	14	0.707	2021-04-21	5
632008	2016-9086	2016-03-29	U181	14	0.043	2021-04-21	5	Rerun CV= 22.2	0.101	2021-04-29	7	Rerun CV = 23.3		used averaged concentration between runs 1 and 2 (because similar CVs) : 0.072
632848	2016-9164	2016-04-05	U182	16	0.368	2021-04-21	5
632789	2016-9228	2016-04-08	U183	16	0.807	2021-04-21	5
630851	2016-9309	2016-04-11	U184	10	0.517	2021-04-20	4
630721	2016-15824	2016-04-28	U185	8	0.341	2021-04-14	3
631372	2016-15844	2016-04-29	U186	13	0.497	2021-04-20	4
633369	2016-15864	2016-05-03	U187	17	0.304	2021-04-21	6
632343	2016-16072	2016-05-24	U188	15	2.05	2021-04-21	5
632604	2016-16140	2016-05-30	U189	16	0.286	2021-04-21	5
633242	2016-16176	2016-06-02	U190	17	0.795	2021-04-21	5
633271	2016-16200	2016-06-03	U191	18	0.319	2021-04-21	6
633499	2016-16300	2016-06-13	U192	18	0.194	2021-04-21	6
633587	2016-16312	2016-06-14	U193	18	0.494	2021-04-21	6
632848	2016-16564	2016-07-05	U194	16	0.427	2021-04-21	5
633284	2016-16620	2016-07-11	U195	18?	0.31	2021-04-21	6
