# Supplementary material for: Starting to have sexual intercourse is associated with increases in cervicovaginal immune mediators in young women: a prospective study and meta-analysis
Source: eLife journal article supplement (doi:10.7554/elife.78565), 2022-10-06
Supplement: code1 [file 2021-06-10_cleaned_progesterone_data.xlsx]

## Sheet: List_SPID_and_date_and_sera
SerumSpYear	SerumSpNum	ProgesteroneId	PatientId	CollectionDate	ProgesteroneNgPerMl	ProgesteroneNgPerMlBelowLodImputed
2015	132	1	630082	2014-10-03	6.34	6.34
2015	153	2	630297	2014-11-24	13.22	13.22
2015	161	3	630372	2014-12-05	<0.05	0.025
2015	165	4	630415	2014-12-11	0.109	0.109
2015	170	5	630460	2014-12-17	2.08	2.08
2015	471	6	630125	2015-01-08	1.35	1.35
2015	479	7	630242	2015-02-04	16.06	16.06
2015	482	8	630574	2015-01-29	6.88	6.88
2015	484	9	630213	2015-02-02	7.05	7.05
2015	486	10	630082	2015-01-20	0.168	0.168
2015	489	11	630590	2015-02-05	4.48	4.48
2015	491	12	630604	2015-02-12	7.25	7.25
2015	496	13	630330	2015-02-19	0.17	0.17
2015	499	14	630343	2015-02-20	15.81	15.81
2015	504	15	630675	2015-02-26	0.054	0.054
2015	507	16	630398	2015-03-04	10.96	10.96
2015	513	17	630066	2015-03-06	11.43	11.43
2015	516	18	630734	2015-03-09	0.055	0.055
2015	517	19	630747	2015-03-06	11.35	11.35
2015	518	20	630750	2015-03-06	0.087	0.087
2015	520	21	630372	2015-03-09	0.1	0.1
2015	521	22	630428	2015-03-09	<0.05	0.025
2015	522	23	630763	2015-03-12	13.39	13.39
2015	523	24	630776	2015-03-12	0.439	0.439
2015	526	25	630486	2015-03-18	<0.05	0.025
2015	527	26	630499	2015-03-18	20.58	20.58
2015	530	27	630806	2015-03-20	11.65	11.65
2015	531	28	630792	2015-03-20	<0.05	0.025
2015	534	29	630457	2015-03-22	0.13	0.13
2015	535	30	630402	2015-03-22	0.128	0.128
2015	536	31	630125	2015-04-08	0.098	0.098
2015	537	32	630835	2015-04-08	0.758	0.758
2015	539	33	630138	2015-04-08	0.839	0.839
2015	540	34	630109	2015-04-08	0.085	0.085
2015	541	35	630848	2015-04-08	2.26	2.26
2015	545	36	630864	2015-04-08	0.094	0.094
2015	547	37	630880	2015-04-10	<0.05	0.025
2015	556	38	630415	2015-04-14	5.93	5.93
2015	557	39	630385	2015-04-15	0.777	0.777
2015	558	40	630910	2015-04-16	4.76	4.76
2015	559	41	630923	2015-04-20	0.204	0.204
2015	561	42	630037	2015-04-17	0.195	0.195
2015	562	43	630949	2015-04-17	6.51	6.51
2015	563	44	630952	2015-04-17	1.9	1.9
2015	564	45	630503	2015-04-20	9.56	9.56
2015	565	46	630965	2015-04-20	0.118	0.118
2015	567	47	630981	2015-04-21	2.42	2.42
2015	568	48	630978	2015-04-21	6.41	6.41
2015	572	49	631008	2015-04-22	0.14	0.14
2015	591	50	630545	2015-04-28	1.45	1.45
2015	592	51	630529	2015-04-28	8.45	8.45
2015	597	52	630574	2015-04-29	0.349	0.349
2015	601	53	631271	2015-04-30	0.167	0.167
2015	606	54	630297	2015-04-30	0.523	0.523
2015	617	55	630428	2015-05-04	13.62	13.62
2015	620	56	630503	2015-05-05	0.133	0.133
2015	627	57	630242	2015-05-11	1.24	1.24
2015	632	58	630196	2015-05-12	0.236	0.236
2015	637	59	630604	2015-05-13	0.313	0.313
2015	638	60	630620	2015-05-14	14.51	14.51
2015	640	61	630327	2015-05-14	0.091	0.091
2015	643	62	630330	2015-05-15	0.301	0.301
2015	648	63	630183	2015-05-20	2.39	2.39
2015	650	64	630646	2015-05-21	0.561	0.561
2015	652	65	631574	2015-05-22	5.64	5.64
2015	654	66	630343	2015-05-27	0.267	0.267
2015	657	67	630398	2015-05-27	0.131	0.131
2015	660	68	630066	2015-06-02	18.37	18.37
2015	661	69	630053	2015-06-02	0.205	0.205
2015	663	70	630675	2015-06-02	0.222	0.222
2015	665	71	630763	2015-06-18	0.455	0.455
2015	669	72	630750	2015-06-11	0.919	0.919
2015	671	73	630747	2015-06-10	0.229	0.229
2015	672	74	630734	2015-06-04	<0.05	0.025
2015	688	75	630079	2015-06-16	0.232	0.232
2015	689	76	630529	2015-06-17	0.09	0.09
2015	694	77	630486	2015-06-18	0.068	0.068
2015	695	78	630792	2015-06-18	0.055	0.055
2015	696	79	630499	2015-06-18	<0.05	0.025
2015	698	80	630776	2015-06-18	0.14	0.14
2015	699	81	630806	2015-06-25	0.458	0.458
2015	716	82	630444	2015-06-26	8.99	8.99
2015	717	83	630402	2015-06-26	12.04	12.04
2015	718	84	630385	2015-06-29	<0.05	0.025
2015	722	85	630457	2015-06-29	0.067	0.067
2015	723	86	630460	2015-06-29	0.239	0.239
2015	728	87	632011	2015-07-02	0.207	0.207
2015	868	88	630864	2015-07-07	0.555	0.555
2015	869	89	630835	2015-07-07	13.29	13.29
2015	877	90	632125	2015-07-13	0.096	0.096
2015	880	91	630138	2015-07-15	14.95	14.95
2015	886	92	630213	2015-07-21	14.21	14.21
2015	887	93	631008	2015-07-21	<0.05	0.025
2015	913	94	630200	2015-07-31	1.04	1.04
2015	914	95	630196	2015-07-31	4.75	4.75
2015	917	96	630880	2015-08-03	0.098	0.098
2015	924	97	630183	2015-08-04	0.126	0.126
2015	927	98	632343	2015-08-05	14.48	14.48
2015	932	99	631431	2015-08-06	9.3	9.3
2015	934	100	630620	2015-08-06	10.84	10.84
2015	937	101	631271	2015-08-07	0.08	0.08
2015	943	102	630965	2015-08-07	5.27	5.27
2015	952	103	630978	2015-08-26	6.19	6.19
2015	953	104	630981	2015-08-26	6.75	6.75
2015	957	105	630949	2015-08-11	0.369	0.369
2015	958	106	631196	2015-08-11	0.274	0.274
2015	969	107	630952	2015-08-12	0.522	0.522
2015	973	108	630545	2015-08-17	1.31	1.31
2015	975	109	630040	2015-08-18	17.17	17.17
2015	976	110	630053	2015-08-18	1.47	1.47
2015	979	111	630923	2015-08-18	3.53	3.53
2015	980	112	630910	2015-08-18	23.68	23.68
2015	981	113	631532	2015-08-18	57.4	57.4
2015	983	114	630646	2015-08-19	0.207	0.207
2015	995	115	630590	2015-08-21	0.062	0.062
2015	997	116	630024	2015-08-24	12.74	12.74
2015	1005	117	631183	2015-08-26	11.6	11.6
2015	1023	118	630444	2015-08-31	0.123	0.123
2015	1028	119	631574	2015-09-02	7.08	7.08
2015	1045	120	630037	2015-09-09	39.48	39.48
2015	1051	121	631763	2015-09-18	0.092	0.092
2015	1056	122	630079	2015-09-15	11.79	11.79
2015	1217	123	631835	2015-09-17	0.084	0.084
2015	1222	124	631851	2015-09-21	0.122	0.122
2015	1238	125	632763	2015-09-28	1.61	1.61
2015	1247	126	630109	2015-09-30	8.84	8.84
2015	1257	127	630848	2015-10-05	38.13	38.13
2015	1258	128	632011	2015-10-06	8.82	8.82
2015	1263	129	632095	2015-10-07	16.45	16.45
2015	1264	130	632822	2015-10-07	0.055	0.055
2015	1266	131	632848	2015-10-08	14.74	14.74
2015	1294	132	632125	2015-10-19	0.177	0.177
2015	1326	133	631183	2015-11-02	9.24	9.24
2015	1358	134	631196	2015-11-16	14.97	14.97
2015	1360	135	631532	2015-11-16	331.98	331.98
2015	1361	136	631343	2015-11-17	0.242	0.242
2015	1365	137	632428	2015-11-17	<0.05	0.025
2015	1375	138	633024	2015-11-23	0.106	0.106
2015	1390	139	632516	2015-11-23	12.18	12.18
2015	1391	140	630327	2015-11-23	0.154	0.154
2015	1398	141	631431	2015-11-24	10.62	10.62
2015	1405	142	630200	2015-11-24	0.182	0.182
2015	1431	143	630024	2015-11-27	0.871	0.871
2015	1436	144	633138	2015-11-30	0.115	0.115
2015	1460	145	633239	2015-12-03	7.24	7.24
2015	1474	146	633284	2015-12-08	1.86	1.86
2015	1475	147	633271	2015-12-08	0.159	0.159
2015	1477	148	633297	2015-12-08	1.03	1.03
2015	1491	149	633369	2015-12-10	0.166	0.166
2015	1503	150	630040	2015-12-11	4.26	4.26
2015	1510	151	632008	2015-12-11	6.69	6.69
2015	1515	152	631789	2015-12-14	17.61	17.61
2015	1520	153	631763	2015-12-18	<0.05	0.025
2016	152	154	632343	2015-12-22	0.192	0.192
2016	159	155	632763	2015-12-18	12.44	12.44
2016	178	156	630558	2016-01-04	11.82	11.82
2016	195	157	632848	2016-01-06	1.19	1.19
2016	199	158	632822	2016-01-07	7.07	7.07
2016	202	159	632095	2016-01-07	22.83	22.83
2016	215	160	631835	2016-01-12	24.31	24.31
2016	217	161	632789	2016-01-13	0.15	0.15
2016	241	162	630851	2016-01-21	0.327	0.327
2016	254	163	631343	2016-01-23	17.72	17.72
2016	258	164	633271	2016-01-25	0.578	0.578
2016	269	165	631372	2016-01-29	0.058	0.058
2016	281	166	632343	2016-02-03	21.95	21.95
2016	316	167	632428	2016-02-15	0.17	0.17
2016	347	168	632604	2016-02-24	0.735	0.735
2016	358	169	633024	2016-02-29	0.091	0.091
2016	361	170	633138	2016-02-29	11.47	11.47
2016	373	171	630721	2016-02-29	20.6	20.6
2016	377	172	632516	2016-02-29	16.52	16.52
2016	389	173	630558	2016-03-01	10.22	10.22
2016	393	174	633239	2016-03-02	<0.05	0.025
2016	397	175	633242	2016-03-03	0.085	0.085
2016	410	176	633297	2016-03-07	45.46	45.46
2016	431	177	633499	2016-03-15	0.146	0.146
2016	475	178	633587	2016-03-16	13.28	13.28
2016	483	179	631851	2016-03-18	9.32	9.32
2016	499	180	632008	2016-03-29	0.32	0.32
2016	521	181	632848	2016-04-05	0.212	0.212
2016	537	182	632789	2016-04-08	0.242	0.242
2016	562	183	630851	2016-04-11	0.24	0.24
2016	754	184			1.94	1.94
2016	756	185	630721	2016-04-28	0.235	0.235
2016	761	186	631372	2016-04-29	0.056	0.056
2016	817	187	633271	2016-06-03	0.199	0.199
2016	818	188	632343	2016-05-24	0.279	0.279
2016	819	189	632604	2016-05-30	0.22	0.22
2016	844	190	633242	2016-06-02	26.99	26.99
2016	869	191	633499	2016-06-13	9.05	9.05
2016	877	192	633587	2016-06-14	1.44	1.44
2016	1070	193	632848	2016-07-05	11.92	11.92
2016	1086	194	633284	2016-07-11	4.8	4.8
