# Supplementary material for: Starting to have sexual intercourse is associated with increases in cervicovaginal immune mediators in young women: a prospective study and meta-analysis
Source: eLife journal article supplement (doi:10.7554/elife.78565), 2022-10-06
Supplement: code1 [file 2021-06-23_Ghosh2018.xlsx]

## Sheet: Sorted
ID	Sexually Active	Date Enrolled	Age	Race	LMP	When did patient start menstruating?	Date of Last Sexual Activity	Cycle stage	Cycle stage final	Menstrual Cycle: Regular/Irregular	STD	If yes type of infection		Total Protein (μg/mL)	Elafin (pg/mL)	Elafin (pg/μg)	IL-1α (pg/mL)	IL-1α (pg/μg)	IL-1β (pg/mL)	IL-1β (pg/μg)	HBD-2 (pg/mL)	HBD-2 (pg/μg)	MIP-3α (pg/mL)	MIP-3α (pg/μg)	SLPI (pg/mL)	SLPI (pg/μg)	TNF-α (pg/mL)	TNF-α (pg/μg)	IL-8 (pg/mL)	IL-8 (pg/μg)	IL-6 (pg/mL)	IL-6 (pg/μg)	BaL % of Infection	BaL % of Inhibition	IIIB % of Infection	IIIB % of Inhibition	MMP-1 (pg/mL)	MMP-1 (pg/μg)	MMP-2 (pg/mL)	MMP-2 (pg/μg)	MMP-7 (pg/mL)	MMP-7 (pg/μg)	MMP-8 (pg/mL)	MMP-8 (pg/μg)	MMP-9 (pg/mL)	MMP-9 (pg/μg)	TIMP-1 (pg/mL)	TIMP-1 (pg/μg)	TIMP-2 (pg/mL)
001-HRA	Yes	2014-04-15	14	AA	2014-04-24		2013-08-01	-9	unknown	Regular	No	N/A		221.76	1.08772e+06	4904.92	54.833	0.247263	3.612	0.0162879	3245.87	14.6369	97.477	0.439561	211731	954.777	6.027	0.027178	58.829	0.265282	1.976	0.00891053	66.1244	33.8756	9.77153	90.2285	143.84	0.64863	815.223	3.67615	40.8163	0.184056	3562.69	16.0655	2091.13	9.42968	2256.91	10.1773	3367.52
003-HRA	Yes	2014-07-09	17	AA	2014-06-28	12 yrs old	2014-07-07	11	Follicular	Regular	No	N/A		525.65	2500260	4756.51	209.848	0.399216	98.339	0.187081	52127.1	99.1669	95.04	0.180805	691677	1315.85	27.253	0.0518463	1202.57	2.28777	19.574	0.0372377	68.774	31.226	12.8926	87.1074	143.84	0.273642	7894	15.0176	81.6326	0.155298	34006.7	64.6946	23962.6	45.5865	8850.23	16.8367	15414.7
004-HRA	Yes	2014-07-23	15	C	2014-07-18	13 yrs old	2014-05-01	5	Follicular	Regular	No	N/A		466.531	786266	1685.35	136.581	0.292759	68.831	0.147538	23376.6	50.1073	123.313	0.264319	40554.6	86.928	16.884	0.0361905	2667.99	5.71878	119.636	0.256437	83.8467	16.1533	6.97374	93.0263	143.84	0.308318	10723.8	22.9862	384.149	0.823416	79069.5	169.484	287426	616.091	4556.85	9.76752	6687.28
006-HRA	Yes	2014-08-27	17	C	2014-08-18	12 yrs old	2014-08-06	9	Follicular	Regular	No	N/A		300.875	245727	816.707	79.851	0.265396	22.713	0.0754898	19001.1	63.1529	105.827	0.351731	96105.1	319.419	18.574	0.0617333	544.312	1.8091	52.78	0.175422	44.2802	55.7198	-6.08328	106.083	143.84	0.478073	4475.65	14.8754	129.024	0.428828	157387	523.098	92328.1	306.865	3522.94	11.709	7261.81
008-HRA	Yes	2014-09-08	17	C	2014-09-02	?	2014-08-01	6	Follicular	Regular	No	N/A		101.593	54809.1	539.496	11.872	0.116858	3.612	0.0355536	537.12	5.28698	86.393	0.850383	14785.7	145.538	4.67	0.0459677	56.979	0.560856	1.75	0.0172256	70.0733	29.9267	5.0914	94.9086	1869.43	18.4012	2585.29	25.4475	40.8163	0.401763	1053.94	10.3742	2091.13	20.5834	907.346	8.93119	3391.51
010-HRA	Yes	2014-11-04	16	H	2014-08-04	9 or 10 years old	Unsure	92	unknown	Irregular	No	N/A		350.554	412683	1177.23	81.028	0.231143	18.73	0.0534297	2719.17	7.75678	87.637	0.249996	62460.1	178.175	5.55	0.0158321	450.322	1.2846	3.511	0.0100156	34.8501	65.1499	-7.17804	107.178	143.84	0.410322	815.223	2.32553	594.732	1.69655	77661.8	221.54	45140.8	128.77	2029.85	5.79039	9566.68
013-HRA	Yes	2015-01-14	16	C	2015-01-03	9 yrs old	2014-07-01	11	Follicular	Irregular	No	N/A		322.068	113719	353.091	89.26	0.277146	56.625	0.175817	2815.67	8.74246	573.733	1.7814	140208	435.338	14.613	0.0453724	751.238	2.33254	114.279	0.354829	34.1973	65.8027	-8.92702	108.927	143.84	0.446614	12274.4	38.1112	2275.99	7.06681	94381.9	293.05	128161	397.931	10255.6	31.8429	13537.2
014-HRA	Yes	2015-02-11	17	AA	2015-01-29	10 yrs old	2014-10-01	13	Follicular	Regular	No	N/A		246.549	757067	3070.65	36.7	0.148855	81.363	0.330007	4610.44	18.6999	97.477	0.395366	120513	488.799	4.794	0.0194444	673.511	2.73175	99.216	0.402419	61.0652	38.9348	3.83708	96.1629	143.84	0.583414	4678.39	18.9755	2527.71	10.2524	26512.9	107.536	90435.8	366.807	7237.57	29.3555	2734.58
015-HRA	Yes	2015-02-25	17	C	2015-02-11	12 yrs old	2015-01-01	14	Follicular	Regular	No	N/A		90.657	134726	1486.11	36.698	0.404801	3.612	0.0398425	3343.55	36.8813	105.878	1.1679	883341	9743.77	16.298	0.179777	304.314	3.35676	1.75	0.0193035	60.1609	39.8391	-2.16039	102.16	143.84	1.58664	4678.39	51.6054	126.367	1.3939	5996.89	66.1493	10925.7	120.517	7227.68	79.7256	4010.72
017-HRA	Yes	2015-03-25	16	C	2015-03-09	12 yrs old	2015-01-01	16	Luteal	Regular	No	N/A		296.078	850943	2874.05	12.89	0.0435358	3.612	0.0121995	12166.7	41.0927	103.498	0.349563	1.76668e+06	5966.95	15.241	0.0514763	65.87	0.222475	1.75	0.0059106	48.7764	51.2236	1.86283	98.1372	143.84	0.485818	1630.45	5.50682	40.8163	0.137857	5601.01	18.9173	2091.13	7.06276	6405.84	21.6357	4126.5
002-HRA	No	2014-06-27	14	AA	2014-05-30		N/A	28	Luteal	Regular	No	N/A		44.837	478554	10673.2	8.518	0.189977	3.612	0.0805585	1844.4	41.1358	73.621	1.64197	649707	14490.4	4.012	0.0894797	48.115	1.07311	1.75	0.0390303	47.9659	52.0341	8.30718	91.6928	143.84	3.20807	7594.69	169.384	733.777	16.3654	116.957	2.60849	2091.13	46.6384	4631.69	103.301	1885.03
005-HRA	No	2014-07-25	13	AA	2014-07-08	2014-06-01	N/A	17	Luteal	Regular	No	N/A		345.231	150174	434.994	11.857	0.0343451	3.612	0.0104626	1674.3	4.84978	102.303	0.296332	1.76668e+06	5117.39	16.884	0.0489064	82.258	0.238269	5.652	0.0163716	35.2932	64.7068	5.22671	94.7733	143.84	0.416649	4267.45	12.3611	40.8163	0.118229	358.572	1.03864	2091.13	6.05718	44372.3	128.529	13764.6
007-HRA	No	2014-09-05	14	C	2014-08-30	?	N/A	6	Follicular	Regular	No	N/A		291.991	91203.9	312.352	16.415	0.0562175	63.69	0.218123	444.398	1.52196	238.916	0.818231	99244	339.887	18.766	0.0642691	850.886	2.91408	107.304	0.367491	46.6328	53.3672	-2.27143	102.271	143.84	0.492618	5443.72	18.6435	3146.05	10.7745	48003.1	164.399	153912	527.113	3917.57	13.4168	25929.5
009-HRA	No	2014-09-10	16	C	2014-08-14	2009-11-23	N/A	27	Luteal	Regular	No	N/A		228.643	516106	2257.26	21.622	0.0945666	31.776	0.138976	27067.8	118.385	221.235	0.9676	290513	1270.6	19.455	0.085089	1467.54	6.4185	112.137	0.490446	42.7671	57.2329	-7.04603	107.046	143.84	0.629104	8473.91	37.0617	294.432	1.28774	132741	580.56	107878	471.819	8837.12	38.6503	10896.8
011-HRA	No	2014-11-21	15	AA	2014-11-16	12 yrs old	N/A	5	Follicular	Irregular	No	N/A		1648.06	690131	418.755	86.438	0.0524485	379.188	0.230082	22661.6	13.7505	515.753	0.312946	228454	138.621	95.779	0.0581164	4604.45	2.79387	885.425	0.537255	90.805	9.19497	2.2117	97.7883	7045.8	4.27522	10220.5	6.20155	27165.7	16.4835	91283.9	55.3889	310741	188.55	72472.8	43.9748	26175.6
012-HRA	No	2014-11-25	12	C	2014-11-17	2013-08-01	N/A	8	Follicular	Irregular	No	N/A		112.12	399075	3559.36	67.13	0.598733	3.612	0.0322155	7225.64	64.4455	81.355	0.725606	100764	898.713	23.389	0.208607	77.024	0.686978	4.956	0.0442026	60.9764	39.0236	14.4111	85.5889	143.84	1.28291	3603.53	32.14	84.4042	0.752802	3824.15	34.1076	9853.03	87.8793	1814.69	16.1853	17065.6
018-HRA	No	2015-05-08	15	AA	2015-05-04	11 or 12 yrs old	N/A	4	Follicular	Regular	No	N/A		216.27	125201	578.911	17.161	0.0793499	7.224	0.0334027	1713.47	7.92281	115.256	0.532926	42295.6	195.568	65.487	0.302802	360.693	1.66779	11.231	0.0519305	77.2303	22.7697	-1.35976	101.36	143.84	0.665095	14041.4	64.9252	789.393	3.65004	3925.97	18.1531	4182.25	19.3381	2359.18	10.9085	6439.41
019-HRA	No	2015-10-13	11	AA	2015-09-28	11	N/A	15	Luteal	Regular	No	N/A		37.745	6706.71	177.685	6.146	0.16283	3.612	0.0956948	211.925	5.61465	99.968	2.64851	159548	4227.01	31.698	0.839793	30.458	0.806941	1.75	0.0463638	3.8836	96.1164			287.68	7.62168	2293.41	60.7607	243.93	6.46258	319.997	8.47785	2091.13	55.4014	907.346	24.0388	464.554
Notes: Samples highlited in Yelow were Below the Limit of Detection
Samples highlited in RED were Above the Limit of Detection
Samples above limit of detection were set at highest detected Sample*2
Samples below Limit of detection were set at lowest detected sample/2
[truncated: 3 more columns]
