# Supplementary material for: Starting to have sexual intercourse is associated with increases in cervicovaginal immune mediators in young women: a prospective study and meta-analysis
Source: eLife journal article supplement (doi:10.7554/elife.78565), 2022-10-06
Supplement: code1 [file 2021-06-29_Psa.xlsx]

## Sheet: metadata
PatientId	SpId	CollectionDate	Code	Box	TotalProteinPlate	ElisaPlate	PSA Mean Result
630082	2015-5817	2014-10-03	U001		1	2	0.378
630125	2015-18526	2015-01-08	U006		1	2	0.36
630082	2015-18578	2015-01-20	U007		1	2	0.725
630213	2015-18586	2015-02-02	U009		1	2	0.598
630109	2015-18782	2015-04-08	U031		1	2	0.387
630125	2015-18766	2015-04-08	U032		1	2	0.511
630138	2015-18774	2015-04-08	U033		1	2	0.202
630196	2015-19106	2015-05-12	U058		1	2	0.217
630183	2015-19174	2015-05-20	U063		1	2	0.447
630138	2015-27939	2015-07-15	U091		1	2	0.432
630196	2015-28059	2015-07-31	U094		1	2	0.363
630200	2015-28055	2015-07-31	U095		1	2	0.257
630183	2015-28095	2015-08-04	U097		1	2	0.119
630079	2015-28560	2015-09-15	U122		1	2	1.062
630109	2015-35353	2015-09-30	U127		1	2	0.09
630200	2015-35928	2015-11-24	U142		1	2	0.234
630297	2015-18994	2015-04-30	U053	2	2	2	0.264
630297	2015-5857	2014-11-24	U002	3	2	2	0.27
630066	2015-18674	2015-03-06	U017	3	2	2	Below Range
630037	2015-18846	2015-04-17	U041	3	2	2	0.306
630066	2015-19226	2015-06-02	U069	3	2	2	0.721
630079	2015-19306	2015-06-16	U074	3	2	2	Below Range
630040	2015-28257	2015-08-18	U107	3	2	2	Below Range
630053	2015-28261	2015-08-18	U108	3	2	2	0.1
630024	2015-28345	2015-08-24	U114	3	2	2	0.71
630037	2015-28514	2015-09-09	U120	3	2	2	0.294
630024	2015-36004	2015-11-27	U144	3	2	2	2
630040	2015-36272	2015-12-11	U151	3	2	2	0.484
630330	2015-18618	2015-02-19	U013	4	2	2	0.123
630343	2015-18630	2015-02-20	U014	4	2	2	1.184
630398	2015-18658	2015-03-04	U016	4	2	3	Below Range
630372	2015-18706	2015-03-09	U020	4	2	2	0.252
630402	2015-18762	2015-03-22	U029	4	2	3	Below Range
630330	2015-19154	2015-05-15	U062	4	2	2	0.042
630343	2015-19202	2015-05-27	U066	4	2	2	ABOVE range
630398	2015-19210	2015-05-27	U067	4	2	3	Below Range
630385	2015-19432	2015-06-29	U084	4	2	3	Below Range
630415	2015-5879	2014-12-11	U004	5	2	3	Below Range
630460	2015-5889	2014-12-17	U005	5	2	3	Below Range
630428	2015-18714	2015-03-09	U021	5	2	3	Below Range
630457	2015-18758	2015-03-22	U030	5	2	3	Below Range
630415	2015-18834	2015-04-14	U038	5	2	3	Below Range
630428	2015-19050	2015-05-04	U055	5	2	3	Below Range
630402	2015-19424	2015-06-26	U082	5	2	3	Below Range
630444	2015-19422	2015-06-26	U083	5	2	3	Below Range
630457	2015-19448	2015-06-29	U085	5	2	3	Below Range
630460	2015-19428	2015-06-29	U086	5	2	3	Below Range
630444	2015-28453	2015-08-31	U118	5	2	3	Below Range
630486	2015-18730	2015-03-18	U025	6	2	3	Below Range
630372	2015-5873	2014-12-05	U003		2	2	1.862
630242	2015-18574	2015-02-04	U010		2	2	0.382
630385	2015-18838	2015-04-15	U039	4?	2	3	Below Range
630242	2015-19090	2015-05-11	U057		2	2	0.175
630327	2015-19142	2015-05-14	U060		2	2	0.435
630213	2015-27959	2015-07-21	U092		2	2	52.093
630327	2015-35869	2015-11-23	U139		2	2	391.482
630499	2015-18734	2015-03-18	U026	6	3	3	Below Range
630503	2015-18866	2015-04-20	U044	6	3	3	Below Range
630529	2015-18958	2015-04-28	U050	6	3	3	Below Range
630545	2015-18954	2015-04-28	U051	6	3	3	Below Range
630503	2015-19054	2015-05-05	U056	6	3	3	Below Range
630529	2015-19310	2015-06-17	U075	6	3	3	Below Range
630486	2015-19326	2015-06-18	U076	6	3	3	Below Range
630499	2015-19334	2015-06-18	U077	6	3	3	Below Range
630545	2015-28253	2015-08-17	U106	6	3	3	Below Range
630574	2015-18562	2015-01-29	U008	7	3	3	Below Range
630590	2015-18594	2015-02-05	U011	7	3	3	Below Range
630604	2015-18602	2015-02-12	U012	7	3	3	Below Range
630574	2015-18982	2015-04-29	U052	7	3	3	Below Range
630604	2015-19130	2015-05-13	U059	7	3	3	Below Range
630620	2015-19134	2015-05-14	U061	7	3	3	Below Range
630620	2015-28139	2015-08-06	U099	7	3	3	Below Range
630590	2015-28341	2015-08-21	U113	7	3	3	Below Range
630558	2016-6973	2016-01-04	U157	7	3	3	Below Range
630675	2015-18646	2015-02-26	U015	8	3	3	Below Range
630747	2015-18690	2015-03-06	U018	8	3	4	0.765
630750	2015-18694	2015-03-06	U019	8	3	4	4.158
630734	2015-18702	2015-03-09	U022	8	3	4	0.778
630646	2015-19178	2015-05-21	U064	8	3	3	Below Range
630675	2015-19222	2015-06-02	U070	8	3	3	Below Range
630734	2015-19242	2015-06-04	U071	8	3	4	0.846
630747	2015-19262	2015-06-10	U072	8	3	4	0.768
630646	2015-28301	2015-08-19	U112	8	3	3	Below Range
630721	2016-8762	2016-02-29	U170	8	3	4	0.846
630721	2016-15824	2016-04-28	U185	8	3	4	0.925
630763	2015-18718	2015-03-12	U023	9	3	4	0.827
630776	2015-18722	2015-03-12	U024	9	3	4	1.371
630792	2015-18746	2015-03-20	U027	9	3	4	1.016
630806	2015-18742	2015-03-20	U028	9	3	4	0.75
630835	2015-18770	2015-04-08	U034	9	3	4	0.849
630750	2015-19266	2015-06-11	U073	9	3	4	0.802
630763	2015-19346	2015-06-18	U078	9	3	4	0.884
630776	2015-19342	2015-06-18	U079	9	3	4	0.859
630792	2015-19330	2015-06-18	U080	9	3	4	1.062
630806	2015-19414	2015-06-25	U081	9	3	4	0.739
630558	2016-8814	2016-03-01	U174	7?	3	3	Below Range
630835	2015-27891	2015-07-07	U088	9	4	4	0.803
630848	2015-18790	2015-04-08	U035	10	4	4	0.764
630864	2015-18798	2015-04-08	U036	10	4	4	2.951
630880	2015-18814	2015-04-10	U037	10	4	4	0.76
630910	2015-18842	2015-04-16	U040	10	4	4	0.851
630952	2015-18854	2015-04-17	U043	10	4	4	0.741
630965	2015-18870	2015-04-20	U046	10	4	4	0.84
630978	2015-18874	2015-04-21	U047	10	4	4	0.747
630864	2015-27895	2015-07-07	U089	10	4	4	1.286
630880	2015-28067	2015-08-03	U096	10	4	4	0.746
630949	2015-28205	2015-08-11	U103	10	4	4	5.772
630910	2015-28277	2015-08-18	U109	10	4	4	0.77
630923	2015-28273	2015-08-18	U110	10	4	4	0.803
630848	2015-35389	2015-10-05	U128	10	4	4	0.826
630851	2016-7213	2016-01-21	U163	10	4	4	0.875
630851	2016-9309	2016-04-11	U184	10	4	4	0.776
630949	2015-18850	2015-04-17	U042	11	4	4	2.098
630923	2015-18862	2015-04-20	U045	11	4	4	0.752
630981	2015-18878	2015-04-21	U048	11	4	4	0.832
630965	2015-28167	2015-08-07	U101	11	4	4	0.766
631008	2015-18898	2015-04-22	U049	12	4	4	0.792
631271	2015-19010	2015-04-30	U054	12	4	5	Below Range
631008	2015-27967	2015-07-21	U093	12	4	4	0.755
631271	2015-28143	2015-08-07	U102	12	4	5	Below Range
631196	2015-28201	2015-08-11	U104	12	4	5	Below Range
630981	2015-28401	2015-08-26	U116	12	4	4	0.802
631183	2015-28381	2015-08-26	U117	12	4	5	Below Range
631183	2015-35633	2015-11-02	U134	12	4	5	Below Range
631196	2015-35720	2015-11-16	U135	12	4	5	Below Range
631343	2015-35763	2015-11-17	U137	12	4	5	Below Range
631431	2015-28127	2015-08-06	U100	13	4	5	0.338
631532	2015-28285	2015-08-18	U111	13	4	5	Below Range
631574	2015-28465	2015-09-02	U119	13	4	5	Below Range
631763	2015-35257	2015-09-18	U124	13	4	5	Below Range
631532	2015-35724	2015-11-16	U136	13	4	5	Below Range
631431	2015-35892	2015-11-24	U143	13	4	5	Below Range
631763	2016-6877	2015-12-18	U154	13	4	5	Below Range
631343	2016-7263	2016-01-23	U164	13	4	5	Below Range
631372	2016-7319	2016-01-29	U166	13	4	5	0.214
631372	2016-15844	2016-04-29	U186	13	4	5	Below Range
632011	2015-19460	2015-07-02	U087	14	5	5	Below Range
631789	2015-28540	2015-09-14	U121	14	5	5	Below Range
631835	2015-35245	2015-09-17	U123	14	5	5	Below Range
632011	2015-35397	2015-10-06	U129	14	5	5	Below Range
632095	2015-35417	2015-10-07	U130	14	5	5	Below Range
632008	2015-36300	2015-12-11	U152	14	5	5	Below Range
631789	2015-36320	2015-12-14	U153	14	5	5	Below Range
632095	2016-7057	2016-01-07	U159	14	5	5	Below Range
631851	2016-9026	2016-03-18	U180	14	5	5	Below Range
632008	2016-9086	2016-03-29	U181	14	5	5	Below Range
632125	2015-27931	2015-07-13	U090	15	5	5	Below Range
632343	2015-28107	2015-08-05	U098	15	5	5	Below Range
632125	2015-35513	2015-10-19	U133	15	5	5	Below Range
632428	2015-35781	2015-11-17	U138	15	5	5	Below Range
632516	2015-35865	2015-11-23	U140	15	5	5	Below Range
632343	2016-6933	2015-12-22	U156	15	5	5	Below Range
632343	2016-7363	2016-02-03	U167	15	5	5	Below Range
632428	2016-7495	2016-02-15	U168	15	5	5	Below Range
632604	2016-7579	2016-02-24	U169	15	5	6	0.295
632516	2016-8770	2016-02-29	U171	15	5	5	Below Range
632343	2016-16072	2016-05-24	U188	15	5	5	Below Range
632763	2015-35313	2015-09-28	U126	16	5	6	0.27
632822	2015-35405	2015-10-07	U131	16	5	6	0.385
632848	2015-35425	2015-10-08	U132	16	5	6	0.289
632763	2016-6897	2015-12-18	U155	16	5	6	0.176
632848	2016-7029	2016-01-06	U158	16	5	6	0.419
632822	2016-7041	2016-01-07	U160	16	5	6	0.483
632789	2016-7125	2016-01-13	U162	16	5	6	0.342
632848	2016-9164	2016-04-05	U182	16	5	6	0.186
632789	2016-9228	2016-04-08	U183	16	5	6	0.292
632604	2016-16140	2016-05-30	U189	16	5	6	0.23
632848	2016-16564	2016-07-05	U194	16	5	6	0.353
633024	2015-35861	2015-11-23	U141	17	5	6	0.265
633138	2015-36016	2015-11-30	U145	17	5	6	0.359
633239	2015-36114	2015-12-03	U146	17	5	6	0.31
633024	2016-8718	2016-02-29	U172	17	5	6	0.321
633138	2016-8730	2016-02-29	U173	17	5	6	0.193
633239	2016-8826	2016-03-02	U175	17	5	6	0.373
633242	2016-8850	2016-03-03	U176	17	5	6	0.213
633242	2016-16176	2016-06-02	U190	17	5	6	0.302
633271	2015-36158	2015-12-08	U147	17	6	6	0.174
633284	2015-36166	2015-12-08	U148	17	6	6	0.413
633271	2016-7279	2016-01-25	U165	17	6	6	0.232
633369	2016-15864	2016-05-03	U187	17	6	6	0.325
633297	2015-36170	2015-12-08	U149	18	6	6	0.29
633369	2015-36232	2015-12-10	U150	18	6	6	0.286
633297	2016-8886	2016-03-07	U177	18	6	6	0.21
633499	2016-8974	2016-03-15	U178	18	6	6	0.457
633587	2016-9002	2016-03-16	U179	18	6	6	0.151
633271	2016-16200	2016-06-03	U191	18	6	6	0.329
633499	2016-16300	2016-06-13	U192	18	6	6	0.239
633587	2016-16312	2016-06-14	U193	18	6	6	0.335
633284	2016-16620	2016-07-11	U195	18?	6	6	0.27
631574	2015-19198	2015-05-22	U065	13	7		Below Range
631835	2016-7109	2016-01-12	U161	14	7	6	1.685
630053	2015-19218	2015-06-02	U068	18	7	2 and 6	11.307 and 8.896
630978	2015-28409	2015-08-26	U115	Gone	7		Gone
631851	2015-35265	2015-09-21	U125	18		6	0.226
630952	2015-28233	2015-08-12	U105	11 - Gone			Gone

## Sheet: Sheet1
PatientId	SpId	Code	Box	TotalProteinPlate	ElisaPlate	PSA Mean Result
630082	2015-5817	U001		1	2	0.378
630297	2015-5857	U002	3	2	2	0.27
630372	2015-5873	U003		2	2	1.862
630415	2015-5879	U004	5	2	3	Below Range
630460	2015-5889	U005	5	2	3	Below Range
630125	2015-18526	U006		1	2	0.36
630082	2015-18578	U007		1	2	0.725
630574	2015-18562	U008	7	3	3	Below Range
630213	2015-18586	U009		1	2	0.598
630242	2015-18574	U010		2	2	0.382
630590	2015-18594	U011	7	3	3	Below Range
630604	2015-18602	U012	7	3	3	Below Range
630330	2015-18618	U013	4	2	2	0.123
630343	2015-18630	U014	4	2	2	1.184
630675	2015-18646	U015	8	3	3	Below Range
630398	2015-18658	U016	4	2	3	Below Range
630066	2015-18674	U017	3	2	2	Below Range
630747	2015-18690	U018	8	3	4	0.765
630750	2015-18694	U019	8	3	4	4.158
630372	2015-18706	U020	4	2	2	0.252
630428	2015-18714	U021	5	2	3	Below Range
630734	2015-18702	U022	8	3	4	0.778
630763	2015-18718	U023	9	3	4	0.827
630776	2015-18722	U024	9	3	4	1.371
630486	2015-18730	U025	6	2	3	Below Range
630499	2015-18734	U026	6	3	3	Below Range
630792	2015-18746	U027	9	3	4	1.016
630806	2015-18742	U028	9	3	4	0.75
630402	2015-18762	U029	4	2	3	Below Range
630457	2015-18758	U030	5	2	3	Below Range
630109	2015-18782	U031		1	2	0.387
630125	2015-18766	U032		1	2	0.511
630138	2015-18774	U033		1	2	0.202
630835	2015-18770	U034	9	3	4	0.849
630848	2015-18790	U035	10	4	4	0.764
630864	2015-18798	U036	10	4	4	2.951
630880	2015-18814	U037	10	4	4	0.76
630415	2015-18834	U038	5	2	3	Below Range
630385	2015-18838	U039	4?	2	3	Below Range
630910	2015-18842	U040	10	4	4	0.851
630037	2015-18846	U041	3	2	2	0.306
630949	2015-18850	U042	11	4	4	2.098
630952	2015-18854	U043	10	4	4	0.741
630503	2015-18866	U044	6	3	3	Below Range
630923	2015-18862	U045	11	4	4	0.752
630965	2015-18870	U046	10	4	4	0.84
630978	2015-18874	U047	10	4	4	0.747
630981	2015-18878	U048	11	4	4	0.832
631008	2015-18898	U049	12	4	4	0.792
630529	2015-18958	U050	6	3	3	Below Range
630545	2015-18954	U051	6	3	3	Below Range
630574	2015-18982	U052	7	3	3	Below Range
630297	2015-18994	U053	2	2	2	0.264
631271	2015-19010	U054	12	4	5	Below Range
630428	2015-19050	U055	5	2	3	Below Range
630503	2015-19054	U056	6	3	3	Below Range
630242	2015-19090	U057		2	2	0.175
630196	2015-19106	U058		1	2	0.217
630604	2015-19130	U059	7	3	3	Below Range
630327	2015-19142	U060		2	2	0.435
630620	2015-19134	U061	7	3	3	Below Range
630330	2015-19154	U062	4	2	2	0.042
630183	2015-19174	U063		1	2	0.447
630646	2015-19178	U064	8	3	3	Below Range
631574	2015-19198	U065	13	7		Below Range
630343	2015-19202	U066	4	2	2	ABOVE range
630398	2015-19210	U067	4	2	3	Below Range
630053	2015-19218	U068	18	7	2 and 6	11.307 and 8.896
630066	2015-19226	U069	3	2	2	0.721
630675	2015-19222	U070	8	3	3	Below Range
630734	2015-19242	U071	8	3	4	0.846
630747	2015-19262	U072	8	3	4	0.768
630750	2015-19266	U073	9	3	4	0.802
630079	2015-19306	U074	3	2	2	Below Range
630529	2015-19310	U075	6	3	3	Below Range
630486	2015-19326	U076	6	3	3	Below Range
630499	2015-19334	U077	6	3	3	Below Range
630763	2015-19346	U078	9	3	4	0.884
630776	2015-19342	U079	9	3	4	0.859
630792	2015-19330	U080	9	3	4	1.062
630806	2015-19414	U081	9	3	4	0.739
630402	2015-19424	U082	5	2	3	Below Range
630444	2015-19422	U083	5	2	3	Below Range
630385	2015-19432	U084	4	2	3	Below Range
630457	2015-19448	U085	5	2	3	Below Range
630460	2015-19428	U086	5	2	3	Below Range
632011	2015-19460	U087	14	5	5	Below Range
630835	2015-27891	U088	9	4	4	0.803
630864	2015-27895	U089	10	4	4	1.286
632125	2015-27931	U090	15	5	5	Below Range
630138	2015-27939	U091		1	2	0.432
630213	2015-27959	U092		2	2	52.093
631008	2015-27967	U093	12	4	4	0.755
630196	2015-28059	U094		1	2	0.363
630200	2015-28055	U095		1	2	0.257
630880	2015-28067	U096	10	4	4	0.746
630183	2015-28095	U097		1	2	0.119
632343	2015-28107	U098	15	5	5	Below Range
630620	2015-28139	U099	7	3	3	Below Range
631431	2015-28127	U100	13	4	5	0.338
630965	2015-28167	U101	11	4	4	0.766
631271	2015-28143	U102	12	4	5	Below Range
630949	2015-28205	U103	10	4	4	5.772
631196	2015-28201	U104	12	4	5	Below Range
630952	2015-28233	U105	11 - Gone			Gone
630545	2015-28253	U106	6	3	3	Below Range
630040	2015-28257	U107	3	2	2	Below Range
630053	2015-28261	U108	3	2	2	0.1
630910	2015-28277	U109	10	4	4	0.77
630923	2015-28273	U110	10	4	4	0.803
631532	2015-28285	U111	13	4	5	Below Range
630646	2015-28301	U112	8	3	3	Below Range
630590	2015-28341	U113	7	3	3	Below Range
630024	2015-28345	U114	3	2	2	0.71
630978	2015-28409	U115	Gone	7		Gone
630981	2015-28401	U116	12	4	4	0.802
631183	2015-28381	U117	12	4	5	Below Range
630444	2015-28453	U118	5	2	3	Below Range
631574	2015-28465	U119	13	4	5	Below Range
630037	2015-28514	U120	3	2	2	0.294
631789	2015-28540	U121	14	5	5	Below Range
630079	2015-28560	U122		1	2	1.062
631835	2015-35245	U123	14	5	5	Below Range
631763	2015-35257	U124	13	4	5	Below Range
631851	2015-35265	U125	18		6	0.226
632763	2015-35313	U126	16	5	6	0.27
630109	2015-35353	U127		1	2	0.09
630848	2015-35389	U128	10	4	4	0.826
632011	2015-35397	U129	14	5	5	Below Range
632095	2015-35417	U130	14	5	5	Below Range
632822	2015-35405	U131	16	5	6	0.385
632848	2015-35425	U132	16	5	6	0.289
632125	2015-35513	U133	15	5	5	Below Range
631183	2015-35633	U134	12	4	5	Below Range
631196	2015-35720	U135	12	4	5	Below Range
631532	2015-35724	U136	13	4	5	ABOVE Range?
631343	2015-35763	U137	12	4	5	Below Range
632428	2015-35781	U138	15	5	5	Below Range
630327	2015-35869	U139		2	2	391.482
632516	2015-35865	U140	15	5	5	Below Range
633024	2015-35861	U141	17	5	6	0.265
630200	2015-35928	U142		1	2	0.234
631431	2015-35892	U143	13	4	5	Below Range
630024	2015-36004	U144	3	2	2	2
633138	2015-36016	U145	17	5	6	0.359
633239	2015-36114	U146	17	5	6	0.31
633271	2015-36158	U147	17	6	6	0.174
633284	2015-36166	U148	17	6	6	0.413
633297	2015-36170	U149	18	6	6	0.29
633369	2015-36232	U150	18	6	6	0.286
630040	2015-36272	U151	3	2	2	0.484
632008	2015-36300	U152	14	5	5	Below Range
631789	2015-36320	U153	14	5	5	Below Range
631763	2016-6877	U154	13	4	5	Below Range
632763	2016-6897	U155	16	5	6	0.176
632343	2016-6933	U156	15	5	5	Below Range
630558	2016-6973	U157	7	3	3	Below Range
632848	2016-7029	U158	16	5	6	0.419
632095	2016-7057	U159	14	5	5	Below Range
632822	2016-7041	U160	16	5	6	0.483
631835	2016-7109	U161	14	7	6	1.685
632789	2016-7125	U162	16	5	6	0.342
630851	2016-7213	U163	10	4	4	0.875
631343	2016-7263	U164	13	4	5	Below Range
633271	2016-7279	U165	17	6	6	0.232
631372	2016-7319	U166	13	4	5	0.214
632343	2016-7363	U167	15	5	5	Below Range
632428	2016-7495	U168	15	5	5	Below Range
632604	2016-7579	U169	15	5	6	0.295
630721	2016-8762	U170	8	3	4	0.846
632516	2016-8770	U171	15	5	5	Below Range
633024	2016-8718	U172	17	5	6	0.321
633138	2016-8730	U173	17	5	6	0.193
630558	2016-8814	U174	7?	3	3	Below Range
633239	2016-8826	U175	17	5	6	0.373
633242	2016-8850	U176	17	5	6	0.213
633297	2016-8886	U177	18	6	6	0.21
633499	2016-8974	U178	18	6	6	0.457
633587	2016-9002	U179	18	6	6	0.151
631851	2016-9026	U180	14	5	5	Below Range
632008	2016-9086	U181	14	5	5	Below Range
632848	2016-9164	U182	16	5	6	0.186
632789	2016-9228	U183	16	5	6	0.292
630851	2016-9309	U184	10	4	4	0.776
630721	2016-15824	U185	8	3	4	0.925
631372	2016-15844	U186	13	4	5	Below Range
633369	2016-15864	U187	17	6	6	0.325
632343	2016-16072	U188	15	5	5	Below Range
632604	2016-16140	U189	16	5	6	0.23
633242	2016-16176	U190	17	5	6	0.302
633271	2016-16200	U191	18	6	6	0.329
633499	2016-16300	U192	18	6	6	0.239
633587	2016-16312	U193	18	6	6	0.335
632848	2016-16564	U194	16	5	6	0.353
633284	2016-16620	U195	18?	6	6	0.27
