# Supplementary material for: Starting to have sexual intercourse is associated with increases in cervicovaginal immune mediators in young women: a prospective study and meta-analysis
Source: eLife journal article supplement (doi:10.7554/elife.78565), 2022-10-06
Supplement: code1 [file 2022-07-25_Demographics.xlsx]

## Sheet: Data
ptid	sdem_vsdate	penr_vsdate	hadSex_first_date2	VisitFU_last_visitdate	Screen_Age_years_floor	Enroll_Age_years_floor	ageY_menarche_FV_first	Menarche_to_Sex_Years	sdem_2	sdem_3a	sdem_3b	income_cat	sdem_4a	sdem_4b	sdem_5a	sdem_5b	sdem_5c	sdem_5d	housing_condition	sdem_5e	num_rooms_cat	sdem_5f	num_people_catC	fv_12_FV_first	FV_marital	prg_vs_first	prg_dt_first	prg_2b_first	pout_2_first	pout_2_first_UP
630011	2014-08-13	2014-08-29	2013-08-01	2019-08-07	16	16	12	3.0883	10	0	0	0	2	1	1	1	1	1	1	3	3	4	4	2	2
630024	2014-08-13	2014-08-29		2017-02-14	17	17			10	0	0	0	1	2	0	0	0	1	3	1	1	5	5		9
630037	2014-08-19	2014-09-01	2015-06-01	2019-08-09	18	18	16.0833	2.83795	11	0	0	0	1	2	0	0	1	1	3	2	2	5	5	2	2	18	2016-01-21	2015-06-16	2016-02-12	2016-02-12
630040	2014-09-02	2014-09-16	2016-12-06	2018-08-06	18	18	16	4.62149	11	0	0	0	1	2	0	0	0	1	3	2	2	6	6	1	1
630053	2014-09-02	2014-09-19		2015-08-18	18	18			11	0	0	0	1	2	0	0	0	1	3	4	4	4	4		9
630066	2014-09-02	2014-09-19	2015-05-01	2015-09-17	18	18			8	0	0	0	1	2	0	0	1	1	3	3	3	7	7		9
630079	2014-09-08	2014-09-19		2017-09-04	17	17			8	0	1000	1	2	1	0	1	1	1	2	3	3	3	3		9
630082	2014-09-23	2014-10-03	2014-12-23	2015-09-30	19	19			13	1	4500	2	2	1	1	1	1	1	1	4	4	4	4		9
630095	2014-09-23	2014-10-03		2016-01-28	19	19			13	1	3000	2	2	1	1	1	1	1	1	4	4	4	4		9
630109	2014-09-23	2014-10-03	2015-04-08	2016-01-28	20	20			13	1	7000	2	2	1	1	1	1	1	1	4	4	3	3		9
630112	2014-10-07	2014-10-15	2012-07-01	2019-09-20	18	18	12.6667	4.03696	13	1	3000	2	2	1	0	1	1	1	2	4	4	5	5	1	1
630125	2014-10-07	2014-10-16	2015-02-01	2019-09-20	18	18	14	4.84463	14	1	3000	2	2	1	1	1	1	1	1	3	3	6	6	1	1
630138	2014-10-07	2014-10-16	2015-04-08	2019-09-11	19	19	15	4.89596	12	0	0	0	2	1	1	1	1	1	1	2	2	4	4	1	1	39	2018-01-19	2017-11-24	2018-09-10	2018-09-10
630141	2014-10-10	2014-10-22	2014-06-01	2016-07-13	16	16			10	1	600	1	2	1	0	1	0	1	3	1	1	3	3		9
630154	2014-10-14	2014-10-24	2014-07-01	2016-01-06	19	19			12	0	0	0	2	1	0	1	1	1	2	2	2	4	4		9
630167	2014-10-14	2014-10-24		2015-07-21	18	18			12	1	2000	2	2	1	0	1	1	1	2	2	2	6	6		9
630170	2014-10-27	2014-11-05		2017-12-06	19	19			12	0	0	0	2	1	1	1	1	1	1	2	2	4	4		9
630183	2014-10-31	2014-11-06		2017-11-06	20	20			13	1	200	1	2	1	1	1	1	1	1	1	1	9	7		9
630196	2014-10-31	2014-11-10	2017-01-02	2017-07-27	18	18			12	1	12000	2	2	1	1	1	1	1	1	2	2	4	4		9
630200	2014-10-31	2014-11-10	2015-05-12	2019-09-17	19	19	12.9167	6.67266	12	0	0	0	2	1	1	1	1	1	1	4	4	5	5	2	2
630213	2014-10-31	2014-11-10	2017-06-01	2019-10-01	19	19	16	5.62902	13	1	4000	2	2	1	1	1	1	1	1	5	5	4	4	2	2
630226	2014-11-03	2014-11-11	2016-04-03	2016-05-29	20	20			13	1	1000	1	1	2	1	1	1	1	3	3	3	3	3		9
630239	2014-11-05	2014-11-11		2019-09-06	19	19	17		13	1	9000	2	1	1	0	0	0	1	3	3	3	8	7		9
630242	2014-10-31	2014-11-12	2015-05-11	2017-10-11	21	21			12	0	9000	2	2	1	1	1	1	1	1	1	1	4	4		9
630255	2014-11-13	2014-11-19	2014-11-19	2014-11-19	18	18			8	0	0	0	1	2	0	0	0	1	3	3	3	5	5		9
630268	2014-11-13	2014-11-20		2014-11-20	20	20			10	0	0	0	1	2	0	1	0	1	3	4	4	9	7		9
630271	2014-11-13	2014-11-21		2014-11-21	19	19			12	0	0	0	1	1	1	1	0	0	3	5	5	2	2		9
630284	2014-11-13	2014-11-21		2014-11-21	20	20			12	1	1500	2	1	2	0	1	0	1	3	4	4	2	2		9
630297	2014-11-14	2014-11-24		2017-08-25	16	16			10	1	1500	2	1	2	1	1	1	1	3	5	5	5	5		9
630301	2014-11-17	2014-11-26	2014-11-26	2019-10-07	18	18	13	5.25599	11	1	1000	1	2	1	1	1	1	1	1	2	2	5	5	2	2	33	2017-07-28	2017-04-09	2017-12-28	2017-12-28
630314	2014-11-20	2014-11-27		2014-11-27	18	18			12	1	1500	2	1	1	1	1	0	1	3	4	4	8	7		9
630327	2014-11-19	2014-11-27	2015-11-05	2019-11-08	17	17	14	4.32991	11	1	1600	2	2	2	1	0	1	1	3	3	3	6	6	2	2	21	2016-08-22	2016-07-24	2016-08-29	2016-08-29
630330	2014-11-18	2014-11-27	2017-01-08	2019-11-07	16	16	13	5.89665	10	0	0	0	2	1	1	1	1	1	1	3	3	7	7	1	1	27	2017-02-10	2017-01-08	2017-10-03	2017-10-03
630343	2014-11-18	2014-11-28	2015-05-01	2019-11-04	18	19	18.4167	1.03029	11	0	0	0	1	1	0	0	1	1	2	2	2	6	6	2	2	18	2016-06-24	2015-12-17	2016-09-23	2016-09-23
630356	2014-11-19	2014-11-28	2013-10-17	2019-09-19	17	17	14	2.77481	10	1	1000	1	2	1	1	1	1	1	1	4	4	5	5		9	51	2019-02-07	2018-10-29	2019-07-02	2019-07-02
630369	2014-11-27	2014-12-03		2020-01-07	18	18	14		10	1	150	1	2	1	0	1	1	1	2	2	2	7	7		9
630372	2014-11-26	2014-12-05	2018-04-15	2019-11-15	16	16	12	7.72895	10	1	3000	2	2	2	1	1	1	1	3	4	4	6	6		9	45	2018-07-03	2018-04-15	2019-01-20	2019-01-20
630385	2014-11-17	2014-12-05	2017-08-01	2019-11-12	18	18	15.5	5.86071	10	1	3000	2	1	1	0	1	1	1	2	1	1	3	3	2	2
630398	2014-12-01	2014-12-10	2016-11-10	2019-05-13	18	18	14	6.04928	11	1	500	1	2	1	1	1	1	1	1	2	2	6	6	2	2	36	2017-11-10	2017-10-10	2018-06-17	2018-06-17
630402	2014-12-01	2014-12-10		2015-08-19	18	18			11	1	500	1	1	1	0	0	0	1	3	4	4	6	6		9
630415	2014-12-01	2014-12-11	2014-12-11	2019-11-15	16	16	12	4.2601	10	1	2000	2	2	1	1	1	1	1	1	5	5	5	5	1	1
630428	2014-12-01	2014-12-11	2015-05-04	2017-10-27	17	17			11	1	1500	2	1	2	0	1	0	1	3	4	4	7	7		9
630431	2014-12-01	2014-12-11	2014-12-11	2015-03-15	17	17			11	1	1500	2	1	3	0	1	0	1	3	4	4	5	5		9
630444	2014-12-02	2014-12-16	2014-12-16	2017-11-30	17	17			9	0	0	0	1	1	0	0	1	1	2	3	3	4	4		9
630457	2014-12-01	2014-12-17		2018-08-09	17	17	15.0833		11	1	200	1	1	1	0	1	0	1	3	3	3	3	3		9
630460	2014-12-10	2014-12-17		2018-01-08	16	16			11	1	300	1	1	1	0	0	0	1	3	3	3	7	7		9
630473	2014-12-02	2014-12-16		2015-04-14	16	16			8	0	0	0	1	1	0	1	0	1	3	3	3	6	6		9
630486	2014-12-09	2014-12-18	2018-02-25	2019-11-26	16	16	14.4167	5.04398	8	1	10000	2	2	1	0	0	0	1	3	3	3	7	7		9
630499	2014-12-09	2014-12-18		2017-12-19	17	17			8	1	2500	2	2	2	1	0	0	0	3	3	3	5	5		9
630503	2014-12-11	2014-12-19	2016-08-01	2019-11-22	16	16	13	5.43669	11	1	200	1	2	1	0	1	1	1	2	2	2	5	5	1	1
630516	2014-12-11	2014-12-19	2014-08-01	2019-10-14	16	16	15.1667	1.24949	11	0	0	0	2	1	1	1	1	1	1	2	2	5	5	2	2
630529	2014-12-11	2014-12-19	2014-12-19	2015-09-15	17	17			12	1	500	1	2	1	1	1	1	1	1	2	2	5	5		9
630532	2014-12-02	2014-12-16		2015-05-26	18	19			10	0	0	0	1	1	0	1	0	1	3	3	3	7	7		9
630545	2014-12-15	2015-01-05	2015-01-05	2017-12-21	16	16			10	1	1000	1	2	1	1	1	1	1	1	4	4	4	4		9
630558	2014-12-22	2015-01-12	2016-01-29	2019-11-06	17	17	13	5.26968	10	0	0	0	2	1	0	0	0	1	3	3	3	8	7	1	1	15	2016-03-01	2016-01-29	2016-03-29	2016-03-29
630561	2015-01-12	2015-01-22	2014-12-26	2019-05-31	19	19	14	5.2115	12	0	0	0	2	1	1	1	1	1	1	4	4	4	4	1	1
630574	2015-01-23	2015-01-29	2015-03-29	2017-12-01	19	19			12	0	0	0	2	1	0	0	1	1	2	3	3	6	6		9
630587	2015-01-27	2015-02-04	2015-02-15	2020-01-14	19	19	13	6.3922	13	1	3000	2	2	2	0	1	1	1	3	5	5	2	2	2	2
630590	2015-01-28	2015-02-05	2017-02-01	2020-01-16	19	19	12.25	8.94644	13	1	2000	2	1	1	1	1	1	1	1	3	3	6	6	1	1
630604	2015-02-05	2015-02-12	2015-02-12	2020-01-28	19	19	18.6667	1.0267	13	1	5000	2	2	1	1	1	1	1	1	4	4	4	4	2	2
630617	2015-02-03	2015-02-12	2015-05-01	2019-11-12	19	19	13	6.90691	13	1	1000	1	1	1	0	1	1	1	2	5	5	4	4	1	1	15	2016-05-06	2015-05-01	2016-02-11	2016-02-11
630620	2015-02-05	2015-02-12	2016-09-02	2019-04-29	18	18	12.4167	8.03508	13	1	4000	2	2	1	1	1	1	1	1	7	6	6	6	2	2
630633	2015-01-26	2015-02-13	2015-02-13	2016-06-10	20	20			13	1	3000	2	2	2	1	1	1	1	3	3	3	4	4		9
630646	2015-02-10	2015-02-20	2018-04-25	2019-05-07	19	19	15	7.60917	13	0	0	0	1	2	1	1	1	1	3	4	4	8	7		9
630659	2015-02-12	2015-02-20	2015-02-27	2017-07-11	18	18			13	1	500	1	2	1	1	1	1	1	1	1	1	6	6		9
630662	2015-02-18	2015-02-25	2013-12-01	2019-01-07	19	19	16	2.43669	12	0	0	0	1	1	0	1	0	1	3	3	3	4	4	1	1	24	2017-02-14	2016-11-22	2017-02-10	2017-02-10
630675	2015-02-19	2015-02-26		2015-09-08	20	20			13	0	0	0	1	2	1	1	1	1	3	6	6	6	6		9
630688	2015-02-23	2015-03-04		2015-03-04	18	18			12	0	0	0	1	1	0	0	0	1	3	3	3	4	4		9
630691	2015-02-23	2015-03-04		2015-03-04	18	18			12	1	500	1	2	1	0	1	1	1	2	3	3	4	4		9
630705	2015-02-23	2015-03-05		2016-05-27	16	16			8	0	0	0	1	1	0	1	0	1	3	2	2	4	4		9
630718	2015-02-23	2015-03-05	2018-03-02	2018-03-02	16	16			8	0	0	0	1	1	0	0	0	0	3	2	2	6	6		9
630721	2015-02-23	2015-03-05	2016-04-16	2017-08-21	18	18			12	1	1000	1	1	1	1	1	0	1	3	5	5	6	6		9
630734	2015-02-25	2015-03-06	2016-08-14	2019-11-05	19	19	16	5.22108	12	0	0	0	1	1	0	0	0	0	3	3	3	4	4	2	2	36	2018-02-19	2017-12-19	2018-09-09	2018-09-09
630747	2015-02-25	2015-03-06		2018-02-02	20	20			12	0	0	0	1	1	0	1	0	1	3	3	3	4	4		9
630750	2015-02-25	2015-03-06		2015-09-02	18	18			12	1	500	1	1	1	0	0	1	1	2	4	4	3	3		9
630763	2015-03-06	2015-03-12	2015-03-15	2017-03-01	18	18			12	0	0	0	1	1	0	1	1	1	2	3	3	3	3		9	18	2016-10-06	2016-07-30	2016-08-10	2016-08-10
630776	2015-03-06	2015-03-12		2016-07-18	16	16			8	0	0	0	1	1	0	0	0	0	3	3	3	5	5		9
630789	2015-03-06	2015-03-13	2014-07-01	2020-01-21	19	19	14	4.97057	12	0	0	0	1	1	1	1	0	1	3	4	4	5	5	2	2	60	2020-01-21	2019-09-05	2020-06-13	2020-06-13
630792	2015-03-13	2015-03-20		2015-09-16	19	19			12	0	0	0	2	1	1	1	1	1	1	4	4	3	3		9
630806	2015-03-13	2015-03-20	2016-07-01	2020-02-03	16	16	14	3.66735	8	1	1000	1	1	2	0	0	0	1	3	3	3	7	7		9
630819	2015-03-10	2015-03-20		2015-03-20	18	18			12	1	5000	2	1	1	1	1	1	1	1	3	3	4	4		9
630822	2015-03-09	2015-03-20		2015-03-20	18	18			8	0	0	0	2	1	0	1	1	1	2	1	1	3	3		9
630835	2015-03-26	2015-04-08	2018-01-01	2020-02-21	18	18	15	5.83231	12	1	3000	2	1	1	1	1	1	1	1	5	5	5	5		9	39	2018-06-29	2018-05-21	2018-07-01	2018-07-01
630848	2015-03-31	2015-04-08	2015-07-06	2020-03-12	19	19	11.3333	7.97947	12	1	1500	2	1	1	1	1	1	1	1	9	6	2	2	2	2	60	2020-11-30
630851	2015-03-26	2015-04-08	2016-04-02	2019-09-13	19	19	15	5.26831	12	0	0	0	1	1	1	1	0	1	3	6	6	4	4	2	2
630864	2015-03-26	2015-04-08	2015-06-10	2020-03-17	18	18	16	2.25325	12	0	0	0	1	1	1	1	1	1	1	9	6	5	5	1	1	39	2018-06-22	2018-03-21	2018-11-13	2018-11-13
630877	2015-03-31	2015-04-08	2015-12-10	2016-11-28	18	18			12	0	0	0	1	1	1	1	1	1	1	5	5	8	7		9
630880	2015-04-01	2015-04-10	2015-07-30	2016-03-11	20	20			14	0	0	0	1	1	1	0	0	0	3	3	3	7	7		9
630893	2015-04-01	2015-04-10	2016-06-01	2018-03-27	20	20	15	6.71663	13	1	2000	2	1	2	1	1	1	1	3	8	6	7	7	1	1
630907	2015-04-02	2015-04-13	2017-06-23	2020-06-09	19	19	14	7.63176	12	0	0	0	1	1	0	1	1	1	2	4	4	4	4	1	1
630910	2015-04-10	2015-04-16	2018-01-05	2020-07-07	16	16	14.75	4.07272	10	1	1500	2	1	2	0	1	1	1	3	3	3	5	5	2	2
630923	2015-04-10	2015-04-16	2017-09-15	2020-07-17	19	19	13	8.58522	12	0	0	0	1	1	0	1	1	1	2	3	3	6	6	1	1	45	2018-11-20	2018-09-18	2019-06-17	2019-06-17
630936	2015-04-08	2015-04-16		2015-04-16	18	18			12	0	0	0	1	1	0	1	1	1	2	12	6	6	6		9
630949	2015-04-09	2015-04-17	2016-01-22	2019-12-16	17	17	15.0833	3.03576	12	1	1500	2	1	2	0	0	0	0	3	3	3	5	5	2	2
630952	2015-04-09	2015-04-17	2017-03-03	2019-08-30	16	16	13	5.54073	8	0	0	0	1	1	0	0	0	1	3	3	3	4	4		9
630965	2015-04-08	2015-04-20	2016-09-22	2019-12-03	18	18	14	5.58932	11	1	1000	1	1	1	0	1	0	1	3	6	6	4	4	1	1	42	2018-10-02	2018-08-25	2019-05-20	2019-05-20
630978	2015-04-10	2015-04-21	2015-04-21	2018-05-23	19	19	12	7.35661	11	1	1000	1	1	1	0	1	0	1	3	3	3	6	6		9
630981	2015-04-10	2015-04-21		2017-04-11	18	18			11	1	1000	1	1	1	0	1	0	1	3	4	4	6	6		9
630994	2015-04-10	2015-04-22	2017-01-01	2020-03-26	16	16	13.6667	4.7755	11	0	0	0	1	1	1	1	1	1	1	6	6	6	6	2	2	51	2019-07-23	2019-05-17	2019-07-23	2019-07-23
631008	2015-04-09	2015-04-22	2017-10-09	2020-06-18	19	19	17	5.06981	13	0	0	0	1	1	0	1	1	1	2	3	3	6	6	1	1	60	2020-06-18	2019-12-15	2020-10-06	2020-10-06
631011	2015-04-08	2015-04-23		2015-12-01	17	17			12	0	0	0	1	2	1	1	1	1	3	3	3	5	5		9
631024	2015-04-13	2015-04-23		2015-04-23	18	18			10	1	600	1	1	2	0	0	0	1	3	4	4	3	3		9
631037	2015-04-13	2015-04-23	2016-12-26	2018-07-06	17	17	13	5.97331	8	0	0	0	1	1	0	0	0	1	3	3	3	7	7	2	2	27	2017-08-21	2017-03-27	2017-12-31	2017-12-31
631040	2015-04-13	2015-04-23	2019-04-16	2019-12-19	16	16	14	6.20534	9	0	0	0	1	1	0	0	0	1	3	3	3	7	7		9
631053	2015-04-08	2015-04-23	2015-04-23	2018-04-06	17	17	13	4.36071	10	0	0	0	1	1	0	0	0	1	3	4	4	6	6		9
631066	2015-04-14	2015-04-24	2015-04-24	2020-02-14	16	16	15.6667	0.420945	8	0	0	0	1	1	0	0	0	0	3	3	3	8	7	2	2	42	2018-10-08	2017-11-18	2018-08-13	2018-08-13
631079	2015-04-13	2015-04-24	2017-08-08	2019-12-18	16	16	15	3.46407	9	0	0	0	1	1	0	0	0	1	3	3	3	5	5	1	1	30	2017-09-12	2017-08-08	2017-12-15	2017-12-15
631082	2015-04-14	2015-04-24	2015-04-01	2020-01-06	17	17	13	4.79055	10	1	1500	2	1	2	0	0	0	1	3	3	3	3	3	2	2
631095	2015-04-14	2015-04-24	2015-12-23	2018-05-21	18	18	15	4.15674	11	1	1000	1	1	2	0	1	1	1	3	3	3	4	4		9	15	2016-06-21	2015-12-23	2016-05-30	2016-05-30
631109	2015-04-13	2015-04-24	2015-04-24	2019-11-25	19	19	13	6.17591	12	1	1500	2	1	2	0	0	0	1	3	2	2	6	6		9
631112	2015-04-13	2015-04-24		2015-09-08	16	16			9	0	0	0	1	2	0	0	0	1	3	2	2	4	4		9
631125	2015-04-22	2015-04-27	2013-01-01	2020-03-02	18	18	13	2.718	12	1	1000	1	1	1	0	1	1	1	2	4	4	5	5	2	2	36	2018-05-08	2018-03-20	2018-07-01	2018-07-01
631138	2015-04-22	2015-04-27	2015-01-20	2020-01-08	16	16	15	0.991786	8	0	0	0	1	1	0	1	1	1	2	3	3	5	5	2	2	45	2019-01-14	2018-09-05	2019-01-15	2019-01-15
631141	2015-04-22	2015-04-27	2014-12-01	2016-10-21	19	19			12	0	0	0	1	1	0	1	0	1	3	3	3	3	3		9
631154	2015-04-14	2015-04-27	2018-02-09	2020-03-12	18	18	16	5.25941	10	0	0	0	1	1	0	0	1	1	2	3	3	7	7	1	1	48	2019-04-05	2019-02-03	2019-11-09	2019-11-09
631167	2015-04-14	2015-04-27	2014-12-01	2020-01-07	19	19	16	2.97331	8	1	7000	2	1	1	0	1	1	1	2	2	2	3	3	1	1	21	2017-02-15	2016-03-04	2017-01-11	2017-01-11
631170	2015-04-16	2015-04-28	2015-04-28	2020-06-03	20	20	13.4167	7.35541	13	1	6000	2	1	1	1	1	1	1	1	5	5	5	5	2	2
631183	2015-04-16	2015-04-28	2015-10-17	2020-06-10	18	18	13	5.87474	11	1	6000	2	1	1	0	1	1	1	2	5	5	3	3	1	1
631196	2015-04-16	2015-04-28	2015-04-28	2020-02-10	18	18	15	3.76249	11	1	3000	2	1	1	0	1	1	1	2	3	3	4	4	1	1
631200	2015-04-22	2015-04-28	2018-04-01	2020-01-24	17	17	15	5.79398	10	0	0	0	1	1	0	0	0	1	3	3	3	4	4	1	1	57	2020-01-24	2019-12-17	2020-01-02	2020-01-02
631213	2015-04-16	2015-04-28	2017-09-01	2019-05-06	17	17	14.1667	5.24469	10	1	200	1	1	1	0	1	1	1	2	6	6	5	5	1	1
631226	2015-04-22	2015-04-28		2015-04-28	16	16			10	0	0	0	1	1	0	1	0	1	3	3	3	6	6		9
631239	2015-04-16	2015-04-29	2015-04-29	2016-05-03	19	19			11	0	0	0	1	1	1	1	1	1	1	4	4	5	5		9
631242	2015-04-23	2015-04-29		2015-04-29	16	16			11	0	500	1	1	1	0	1	1	1	2	4	4	6	6		9
631255	2015-04-16	2015-04-29	2015-04-29	2018-05-08	18	18	14	4.54073	11	1	1500	2	1	1	0	1	1	1	2	6	6	3	3	1	1
631268	2015-04-17	2015-04-30		2015-04-30	18	18			11	0	0	0	1	1	0	0	0	1	3	3	3	5	5		9
631271	2015-04-17	2015-04-30	2015-08-01	2016-02-22	18	18			11	0	0	0	1	1	0	0	0	0	3	3	3	3	3		9
631284	2015-04-22	2015-04-30		2015-05-16	18	18			11	0	0	0	1	1	0	1	0	1	3	3	3	3	3		9
631297	2015-04-22	2015-04-30		2015-04-30	19	19			11	0	0	0	1	1	1	0	1	1	2	3	3	3	3		9
631301	2015-04-17	2015-04-30	2015-09-24	2020-03-09	16	16	15.6667	1.2423	12	0	0	0	1	1	0	0	0	0	3	3	3	6	6	1	1	27	2020-12-04	2016-11-01	2017-08-15	2017-08-15
631314	2015-04-16	2015-04-30	2015-08-01	2017-01-27	16	16			10	0	0	0	1	1	0	0	0	1	3	2	2	4	4		9	21	2017-01-27	2015-08-11	2016-05-20	2016-05-20
631327	2015-04-21	2015-05-04	2015-05-04	2020-07-15	18	18	12	6.12731	11	1	1500	2	1	1	0	1	1	1	2	4	4	5	5	1	1	57	2020-01-31	2018-03-08	2018-12-25	2018-12-25
631330	2015-04-21	2015-05-04	2018-04-14	2020-03-19	18	18	14	7.07324	9	0	0	0	1	1	0	1	1	1	2	4	4	5	5	1	1
631343	2015-04-21	2015-05-04		2017-10-23	18	18			10	0	0	0	1	1	0	0	0	1	3	4	4	5	5		9
631356	2015-04-21	2015-05-04	2017-03-15	2017-09-01	18	18			11	1	3000	2	1	1	0	0	0	1	3	5	5	7	7		9
631369	2015-04-21	2015-05-04	2018-02-06	2019-12-06	18	18	17	4.60712	9	0	0	0	1	1	0	1	0	1	3	3	3	6	6	1	1	42	2018-11-15	2018-09-19	2018-10-01	2018-10-01
631372	2015-04-21	2015-05-04	2017-03-21	2018-02-14	19	19			11	1	1500	2	1	1	0	0	0	1	3	3	3	4	4		9
631385	2015-04-20	2015-05-04	2015-05-04	2016-02-29	16	16			9	0	0	0	1	1	0	0	0	1	3	2	2	3	3		9
631398	2015-04-17	2015-05-04		2015-12-16	19	19			11	1	1500	2	1	2	0	0	0	1	3	3	3	5	5		9
631402	2015-04-22	2015-05-04		2015-08-04	19	19			12	0	1000	1	1	1	0	1	1	1	2	4	4	3	3		9
631415	2015-04-20	2015-05-04		2015-05-04	19	19			12	0	500	1	1	1	0	0	0	1	3	3	3	5	5		9
631428	2015-04-27	2015-05-07	2018-06-07	2020-01-08	18	18	14.25	6.86704	10	0	0	0	1	1	0	1	1	1	2	7	6	7	7		9
631431	2015-04-24	2015-05-08	2018-10-01	2020-07-23	18	18	17	5.35729	10	0	0	0	2	1	0	1	0	1	3	4	4	5	5		9
631444	2015-04-28	2015-05-08	2011-01-01	2020-01-09	18	18	13	1.39014	12	1	3000	2	1	1	1	1	1	1	1	7	6	5	5	1	1
631457	2015-04-24	2015-05-09		2015-11-25	16	16			9	0	0	0	1	1	0	0	0	1	3	3	3	3	3		9
631460	2015-04-24	2015-05-09		2018-04-16	19	19	14		9	0	0	0	1	1	0	0	0	1	3	3	3	4	4		9
631473	2015-04-23	2015-05-09		2016-08-24	16	16			7	0	0	0	1	1	0	1	0	1	3	4	4	3	3		9
631486	2015-04-22	2015-05-11	2016-03-28	2020-03-09	19	20	13	7.91444	12	0	0	0	1	1	0	0	0	1	3	2	2	2	2	2	2	15	2016-08-12	2016-03-28	2016-08-08	2016-08-08
631499	2015-04-22	2015-05-13		2018-04-24	17	17	14		10	0	0	0	1	1	0	1	0	1	3	3	3	7	7		9
631503	2015-04-22	2015-05-13		2016-04-15	17	17			11	1	1200	2	1	1	0	0	1	1	2	3	3	8	7		9
631516	2015-05-07	2015-05-14		2020-07-10	16	16	13		8	0	0	0	1	2	0	0	0	0	3	2	2	9	7		9
631529	2015-05-11	2015-05-20	2017-10-15	2020-01-09	18	18	16	4.78029	12	0	0	0	1	1	1	1	1	1	1	6	6	4	4	2	2	33	2018-01-11	2017-12-10	2018-09-29	2018-09-29
631532	2015-05-11	2015-05-20	2015-05-20	2020-05-29	19	19	15	4.3347	12	0	0	0	1	1	1	1	1	1	1	3	3	5	5	2	2
631545	2015-05-11	2015-05-20		2015-08-10	18	18			12	0	0	0	1	1	0	0	0	1	3	3	3	5	5		9
631558	2015-05-14	2015-05-21	2015-10-01	2019-12-04	19	19	13.5833	6.04979	12	1	1500	2	1	1	0	0	1	1	2	3	3	5	5	2	2	45	2019-01-14	2018-12-12	2019-09-24	2019-09-24
631561	2015-05-14	2015-05-21	2015-05-21	2016-02-16	20	20			12	0	0	0	1	1	0	0	1	1	2	2	2	5	5		9
631574	2015-05-15	2015-05-22	2015-08-08	2020-02-04	18	18	13	5.38467	12	0	0	0	2	1	0	1	1	1	2	1	1	1	2	1	1
631587	2015-05-15	2015-05-22		2015-05-22	19	19			12	1	4500	2	1	2	0	1	1	1	3	4	4	5	5		9
631590	2015-05-27	2015-06-04		2020-06-10	19	19	13		12	0	0	0	2	1	1	1	1	1	1	3	3	2	2		9
631604	2015-05-25	2015-06-04	2014-12-01	2020-06-25	19	19	14.9167	3.94439	12	1	6000	2	1	1	0	1	0	0	3	5	5	5	5	2	2	30	2017-12-21	2017-08-03	2018-05-17	2018-05-17
631617	2015-05-26	2015-06-05	2014-01-01	2020-06-04	19	19	14	4.4449	12	1	1000	1	2	1	1	1	1	1	1	1	1	3	3	2	2	21	2017-02-24	2016-12-24	2017-10-10	2017-10-10
631620	2015-05-26	2015-06-05	2014-08-01	2020-01-02	19	19	13	5.93498	12	1	1500	2	2	2	1	1	1	1	3	4	4	6	6	2	2	33	2018-04-04	2018-02-27	2018-12-12	2018-12-12
631633	2015-05-26	2015-06-05	2013-07-01	2017-08-28	19	19			12	1	5000	2	1	1	0	1	1	1	2	3	3	2	2		9
631646	2015-05-26	2015-06-05	2014-10-01	2020-01-24	19	19	14	4.75975	13	0	0	0	1	1	0	1	1	1	2	4	4	7	7	1	1	45	2019-01-30	2018-11-06	2019-08-09	2019-08-09
631659	2015-05-25	2015-06-05		2020-06-23	18	18	12		12	0	0	0	1	1	0	1	1	1	2	5	5	7	7		9
631662	2015-05-13	2015-06-09		2015-06-09	20	20			12	1	6000	2	2	1	1	1	1	1	1	3	3	2	2		9
631675	2015-06-02	2015-06-12	2015-06-01	2016-01-06	18	18			12	1	7000	2	2	1	1	1	1	1	1	3	3	4	4		9
631688	2015-06-02	2015-06-12	2014-02-14	2020-07-16	20	20	15	4.63313	12	0	0	0	2	1	1	1	1	1	1	5	5	4	4	1	1	6	2015-12-11	2015-11-07	2016-05-14	2016-05-14
631691	2015-06-04	2015-06-15	2017-08-25	2018-05-04	18	18	14.8333	5.67043	12	1	1000	1	1	1	1	1	1	1	1	1	1	4	4	2	2	30	2018-01-10	2017-12-23	2018-01-22	2018-01-22
631705	2015-06-04	2015-06-15	2015-06-15	2020-06-05	18	18	14	4.59274	12	1	1500	2	2	2	1	1	1	1	3	6	6	4	4	2	2
631718	2015-06-03	2015-06-15	2015-01-01	2020-02-19	17	18	13	4.57153	12	1	6000	2	1	1	0	1	1	1	2	3	3	6	6	1	1	15	2016-07-25	2015-12-23	2016-09-16	2016-09-16
631721	2015-06-04	2015-06-15	2015-05-15	2020-01-07	18	18	16	2.42026	12	1	2000	2	2	1	0	1	1	1	2	1	1	4	4	1	1
631734	2015-06-05	2015-06-16		2020-08-07	18	18	13		12	1	1000	1	2	1	1	1	1	1	1	2	2	4	4		9
631747	2015-06-04	2015-06-16	2015-06-06	2020-06-08	20	20	20	0.698153	12	1	10000	2	2	1	1	1	1	1	1	2	2	2	2	2	2	27	2017-09-04	2017-07-07	2018-04-06	2018-04-06
631750	2015-06-05	2015-06-16	2014-01-01	2015-06-16	19	19			12	0	0	0	1	1	0	0	0	1	3	3	3	4	4		9
631763	2015-06-04	2015-06-17	2015-09-18	2020-06-05	19	19	14	5.96715	12	1	2000	2	2	1	1	1	1	1	1	6	6	5	5	1	1	60	2020-06-05	2020-02-04	2020-11-09	2020-11-09
631776	2015-06-08	2015-06-17	2016-03-07	2019-10-22	19	19	13	7.03833	12	1	2000	2	2	1	0	1	1	1	2	3	3	5	5	1	1	15	2016-08-17	2016-03-07	2016-08-01	2016-08-01
631789	2015-06-04	2015-06-17	2015-11-17	2019-09-16	20	20	15	6.36345	13	1	4500	2	2	2	1	1	1	1	3	5	5	9	7	1	1
631792	2015-06-04	2015-06-17	2013-07-14	2020-06-04	20	20	14	5.02533	12	1	2000	2	2	1	1	1	1	1	1	1	1	4	4	1	1	54	2020-01-07	2018-12-18	2019-10-17	2019-10-17
631806	2015-06-09	2015-06-18	2013-12-01	2018-06-14	20	20	13	5.97604	13	1	1500	2	2	2	1	1	1	1	3	5	5	10	7	1	1
631819	2015-06-08	2015-06-18	2018-04-05	2020-02-21	18	18	9.25	11.5823	8	0	0	0	1	1	0	1	0	1	3	2	2	4	4		9
631822	2015-06-09	2015-06-18	2014-01-01	2020-06-05	19	19	14	4.44216	12	1	1000	1	1	1	0	1	1	1	2	3	3	6	6	1	1	12	2016-05-06	2015-06-04	2016-03-15	2016-03-15
631835	2015-06-05	2015-06-19	2015-11-10	2017-12-06	19	19			12	0	0	0	2	1	1	1	1	1	1	6	6	5	5		9	15	2016-09-30	2015-11-10	2016-08-10	2016-08-10
631848	2015-06-09	2015-06-19	2014-12-31	2020-06-09	18	18	14	4.0397	11	0	0	0	2	1	1	1	1	1	1	1	1	5	5	2	2	18	2016-12-14	2016-10-05	2017-07-22	2017-07-22
631851	2015-06-10	2015-06-22	2015-12-19	2020-03-11	19	19	15	5	12	0	0	0	1	2	1	1	1	1	3	3	3	5	5	1	1	42	2018-12-17	2018-08-08	2019-07-01	2019-07-01
631864	2015-06-10	2015-06-22	2018-10-07	2020-06-03	18	18	12.9167	9.30647	12	0	0	0	2	2	0	1	1	1	3	3	3	3	3		9
631877	2015-06-09	2015-06-22	2014-08-01	2020-06-29	18	18	11	6.98768	12	0	0	0	2	1	1	1	1	1	1	1	1	2	2	2	2	15	2016-09-16	2016-04-01	2017-01-09	2017-01-09
631880	2015-06-12	2015-06-23	2014-12-01	2020-07-03	20	20	14	5.92608	12	0	0	0	1	1	0	0	1	0	3	5	5	4	4	2	2	18	2016-11-03	2015-11-29	2016-07-30	2016-07-30
631893	2015-06-12	2015-06-23	2012-12-01	2018-03-20	20	20			12	1	4000	2	1	1	1	1	1	1	1	5	5	7	7		9
631907	2015-06-11	2015-06-23	2013-10-01	2020-06-03	18	18	13	4.07871	8	0	0	0	1	1	1	0	1	1	2	1	1	5	5		9	42	2019-01-04	2018-09-28	2019-07-06	2019-07-06
631910	2015-06-12	2015-06-24	2011-05-01	2020-03-06	18	18	13	1.39288	12	0	0	0	1	1	1	1	1	1	1	2	2	5	5	2	2
631923	2015-06-18	2015-06-25	2011-04-01	2019-03-20	20	20	13	3.62423	12	0	0	0	2	1	0	1	1	1	2	5	5	2	2	2	2	33	2018-03-22	2018-01-26	2018-11-08	2018-11-08
631936	2015-06-18	2015-06-25	2015-06-25	2017-12-18	18	18			12	0	0	0	2	2	0	1	1	1	3	1	1	3	3		9
631949	2015-06-11	2015-06-25	2014-03-01	2017-11-29	20	20			12	0	0	0	2	1	1	1	1	1	1	4	4	2	2		9
631952	2015-06-18	2015-06-26	2014-09-30	2020-03-09	19	19	12	6.37372	12	0	0	0	2	1	1	1	1	1	1	3	3	3	3	1	1	57	2020-11-30
631965	2015-06-19	2015-06-29	2014-09-01	2018-06-22	20	20	15	4.436	14	1	2000	2	2	2	1	1	1	1	3	5	5	5	5	1	1
631978	2015-06-19	2015-06-29	2015-02-05	2020-03-04	20	20	15	4.91513	14	1	1500	2	2	2	0	0	1	1	3	3	3	4	4	2	2	9	2016-03-31	2016-01-13	2016-03-31	2016-03-31
631981	2015-06-18	2015-06-30	2014-09-01	2015-07-07	19	19			14	1	2000	2	2	1	1	1	1	1	1	15	6	4	4		9
631994	2015-06-24	2015-07-01	2015-05-01	2018-05-25	19	19	12.9167	6.42351	14	1	1500	2	2	2	1	1	1	1	3	5	5	5	5	2	2
632008	2015-06-22	2015-07-02	2015-06-22	2020-03-06	16	16	15.0833	0.92488	8	0	0	0	2	1	1	1	0	1	3	1	1	3	3	2	2	33	2018-03-23	2018-02-12	2018-11-17	2018-11-17
632011	2015-06-23	2015-07-02	2015-09-01	2020-03-11	18	18	13	5.35455	12	0	0	0	1	1	1	1	1	1	1	6	6	5	5	1	1
632024	2015-06-26	2015-07-03	2015-07-15	2020-07-24	19	19	12	7.88501	13	0	0	0	2	1	1	1	1	1	1	3	3	4	4	1	1
632037	2015-06-18	2015-07-03	2014-09-17	2020-03-09	19	19	11.5	7.59925	14	1	10000	2	2	1	1	1	1	1	1	3	3	3	3	2	2
632040	2015-06-24	2015-07-03		2018-12-21	19	19	15.75		12	0	0	0	2	1	1	1	1	1	1	2	2	4	4		9
632053	2015-06-24	2015-07-03	2016-01-04	2018-02-21	18	18			12	0	0	0	2	1	1	1	1	1	1	2	2	5	5		9
632066	2015-06-24	2015-07-06	2014-09-01	2016-06-29	19	19			12	0	0	0	1	1	1	1	1	1	1	4	4	3	3		9
632079	2015-06-24	2015-07-06	2018-06-20	2020-07-09	18	18	16	5.31691	12	1	1000	1	2	2	1	1	1	1	3	2	2	4	4		9
632082	2015-06-19	2015-07-08	2015-04-12	2018-05-10	19	19	14	4.85558	12	0	0	0	1	1	1	1	1	1	1	7	6	3	3	1	1
632095	2015-07-02	2015-07-09	2015-11-12	2020-06-11	18	18	18	0.962355	13	1	4000	2	2	1	1	1	1	1	1	2	2	5	5	1	1	6	2016-01-07	2015-11-12	2016-01-12	2016-01-12
632109	2015-06-29	2015-07-13	2017-04-03	2019-07-19	19	19	13	7.91718	13	1	5000	2	2	1	1	1	1	1	1	3	3	5	5	2	2
632112	2015-06-30	2015-07-13	2014-10-01	2018-11-09	20	20	15.0833	4.82632	14	0	0	0	1	1	1	1	1	1	1	10	6	5	5	2	2	9	2016-04-18	2016-01-28	2016-10-17	2016-10-17
632125	2015-06-29	2015-07-13	2015-09-01	2020-03-18	17	17	12	5.90007	12	0	0	0	2	1	1	1	1	1	1	2	2	4	4	1	1
632138	2015-06-29	2015-07-13	2013-12-01	2019-03-29	20	20	12.0833	6.60524	14	0	0	0	1	1	1	1	1	1	1	8	6	4	4	2	2
632141	2015-07-03	2015-07-15	2014-12-15	2020-07-02	19	19	13	5.86653	12	0	0	0	2	1	1	1	1	1	1	1	1	1	2	1	1	54	2019-11-18	2019-05-07	2020-02-13	2020-02-13
632154	2015-07-03	2015-07-17	2015-07-17	2020-07-03	20	20	14	6.26283	14	0	0	0	1	1	1	1	1	1	1	3	3	4	4	1	1
632167	2015-07-13	2015-07-23		2016-02-12	20	20			13	1	3000	2	2	1	1	1	0	1	3	5	5	5	5		9
632170	2015-07-13	2015-07-23		2015-12-01	20	20			12	0	0	0	1	1	0	0	1	1	2	7	6	7	7		9
632183	2015-07-13	2015-07-23	2014-07-20	2018-01-26	20	20			12	0	0	0	2	1	1	1	1	1	1	1	1	4	4		9	21	2017-04-24	2017-02-15	2017-04-04	2017-04-04
632196	2015-07-13	2015-07-23	2018-07-01	2018-07-23	18	18			12	0	0	0	2	1	1	1	1	1	1	6	6	5	5		9
632200	2015-07-08	2015-07-24	2015-04-01	2020-07-02	19	19	13	5.92676	12	0	0	0	1	1	1	1	1	1	1	4	4	5	5	2	2	9	2016-05-09	2016-01-25	2016-10-22	2016-10-22
632213	2015-07-07	2015-07-24		2016-10-10	18	18			13	1	13000	2	2	1	1	1	1	1	1	2	2	3	3		9
632226	2015-07-06	2015-07-24	2017-07-01	2019-09-11	19	19	13.4167	7.80715	13	0	0	0	2	1	1	1	1	1	1	2	2	5	5		9
632239	2015-07-13	2015-07-24	2018-06-25	2020-06-10	18	18	12	9.79329	14	1	6000	2	1	1	1	1	1	1	1	3	3	2	2	1	1	39	2018-10-09	2018-06-25	2019-04-06	2019-04-06
632242	2015-07-13	2015-07-24	2017-02-01	2020-07-21	18	19	12	8.54483	12	1	1500	2	1	1	1	1	1	1	1	3	3	5	5	2	2	48	2019-07-10	2019-05-15	2020-02-10	2020-02-10
632255	2015-07-14	2015-07-24	2014-11-02	2016-04-19	19	19			14	0	0	0	1	1	1	1	1	1	1	5	5	4	4		9
632268	2015-07-09	2015-07-27		2015-08-05	19	19			13	1	3000	2	2	2	0	0	0	1	3	3	3	3	3		9
632271	2015-07-09	2015-07-28	2017-08-08	2019-09-05	18	18	16	4.85421	13	1	6000	2	2	1	1	1	1	1	1	3	3	4	4	1	1
632284	2015-07-09	2015-07-28	2015-05-01	2017-04-13	20	20			13	1	1000	1	1	1	0	1	0	1	3	4	4	4	4		9
632297	2015-07-09	2015-07-28	2015-07-01	2020-07-07	19	19	14	5.27173	13	1	3000	2	2	1	1	1	1	1	1	4	4	3	3	1	1
632301	2015-07-09	2015-07-28	2015-03-01	2019-05-27	20	20	13	7.06023	13	1	1500	2	1	1	0	0	0	1	3	4	4	5	5	1	1
632314	2015-07-09	2015-07-29	2015-03-01	2020-07-24	18	18	13	4.86174	12	0	0	0	2	1	0	1	0	1	3	4	4	5	5	1	1
632327	2015-07-21	2015-07-30	2015-01-01	2020-07-03	19	19	15.3333	3.21013	12	1	1000	1	1	2	0	0	0	0	3	4	4	10	7	2	2
632330	2015-07-21	2015-07-31	2015-07-31	2018-04-20	18	18			12	0	0	0	1	1	0	1	0	1	3	5	5	9	7		9
632343	2015-07-20	2015-08-05	2015-07-20	2020-03-24	18	18	12	6.39836	12	0	0	0	2	1	1	1	1	1	1	4	4	5	5	1	1
632356	2015-07-20	2015-08-05	2015-05-13	2018-01-25	19	19			13	1	1000	1	2	2	1	1	1	1	3	2	2	4	4		9
632369	2015-07-29	2015-08-06	2014-12-02	2020-06-11	20	20	15.25	4.16684	12	1	1000	1	1	1	1	1	1	1	1	4	4	4	4	2	2	60	2020-06-11	2020-04-20		2020-06-11
632372	2015-07-30	2015-08-07	2015-05-18	2018-03-16	19	19			12	0	0	0	2	1	1	1	1	1	1	3	3	5	5		9
632385	2015-07-29	2015-08-07	2015-06-01	2020-06-03	19	19	15	4.50445	12	0	0	0	1	1	0	1	1	1	2	3	3	5	5	1	1
632398	2015-08-07	2015-08-17	2015-08-17	2018-08-17	16	16	13	3.61602	10	1	1500	2	2	2	0	0	1	1	3	2	2	2	2	1	1	24	2017-08-16	2017-03-17	2017-12-16	2017-12-16
632402	2015-08-10	2015-08-19		2020-06-25	17	17	16.5		9	1	1000	1	1	1	0	1	1	1	2	6	6	5	5		9
632415	2015-08-13	2015-08-19	2017-01-28	2020-08-13	17	17	15	4.09103	11	1	600	1	1	2	0	0	1	1	3	3	3	5	5	1	1
632428	2015-08-13	2015-08-19	2015-12-24	2020-07-10	17	17	16	1.95209	11	0	0	0	1	1	0	1	0	1	3	2	2	4	4	1	1	30	2018-02-15	2016-12-15	2017-09-10	2017-09-10
632431	2015-08-13	2015-08-20	2014-07-01	2020-06-12	18	18	13.6667	3.7269	10	0	0	0	1	1	0	1	0	1	3	1	1	5	5	2	2
632444	2015-08-13	2015-08-20		2018-08-15	16	16	13		12	0	0	0	1	1	0	1	1	1	2	3	3	6	6		9
632457	2015-08-13	2015-08-20	2014-02-01	2020-03-16	16	16	14.25	0.528918	7	0	0	0	1	1	0	0	0	1	3	3	3	4	4	2	2	6	2016-02-29	2015-09-18	2016-06-13	2016-06-13
632460	2015-08-12	2015-08-21	2015-08-01	2020-07-06	17	17	14.3333	3.47639	10	1	1000	1	1	1	0	1	0	1	3	4	4	4	4	2	2	6	2016-02-17	2015-09-07	2016-07-01	2016-07-01
632473	2015-08-13	2015-08-21	2016-10-29	2020-06-25	18	18	13	6.40589	12	0	0	0	1	1	0	1	1	1	2	2	2	6	6	2	2
632486	2015-08-13	2015-08-21		2018-01-12	17	17			11	1	1000	1	1	2	0	0	0	1	3	3	3	5	5		9
632499	2015-08-12	2015-08-21	2016-12-07	2017-03-03	17	17			9	0	0	0	1	1	0	1	0	1	3	3	3	4	4		9
632503	2015-08-14	2015-08-21	2018-04-15	2020-06-19	17	17	16	4.37782	8	0	0	0	1	1	1	1	1	1	1	5	5	5	5	2	2	36	2018-08-06	2018-06-16	2018-09-28	2018-09-28
632516	2015-08-14	2015-08-25	2016-02-01	2020-06-30	18	18	16.3333	3.03422	11	0	0	0	1	1	1	1	1	1	1	3	3	6	6	2	2
632529	2015-08-13	2015-08-26	2014-12-01	2019-11-08	19	19	14	4.5243	11	0	0	0	1	1	0	1	1	1	2	6	6	8	7	1	1
632532	2015-08-13	2015-08-26	2017-12-15	2020-06-17	16	16	13	5.5024	11	1	1000	1	1	2	0	1	0	1	3	3	3	5	5	2	2	33	2018-05-29	2017-12-15	2018-02-15	2018-02-15
632545	2015-08-19	2015-08-26	2015-04-01	2020-06-16	17	17	14	3.1937	11	0	0	0	1	1	1	0	0	1	3	4	4	6	6	1	1	9	2016-04-15	2015-12-01	2016-09-14	2016-09-14
632558	2015-08-19	2015-08-26	2016-12-31	2020-06-29	16	16	16	1.41273	8	0	0	0	1	1	0	0	0	1	3	3	3	6	6	1	1	30	2018-02-14	2017-04-17	2017-11-01	2017-11-01
632561	2015-08-20	2015-08-27	2015-12-26	2020-07-13	16	16	15.1667	1.71492	10	0	0	0	1	1	1	1	1	1	1	3	3	4	4	1	1	12	2016-08-18	2016-06-15	2017-03-26	2017-03-26
632574	2015-08-18	2015-08-27	2015-01-01	2020-07-21	19	19	14	5.1102	12	0	0	0	2	1	1	1	1	1	1	1	1	3	3	1	1	9	2016-05-23	2016-02-23	2016-07-25	2016-07-25
632587	2015-08-17	2015-08-28	2016-04-01	2020-06-24	18	18	15.1667	3.79569	11	0	0	0	1	1	0	1	1	1	2	3	3	4	4	2	2	15	2016-12-06	2016-04-16	2017-02-05	2017-02-05
632590	2015-08-19	2015-08-28	2018-02-22	2018-05-11	16	16			10	0	0	0	1	1	0	1	1	1	2	3	3	4	4		9
632604	2015-08-17	2015-08-28	2016-05-15	2020-06-24	20	20	15	6.34428	11	0	0	0	1	1	0	1	1	1	2	4	4	4	4	2	2	21	2017-05-25	2017-01-15	2017-10-11	2017-10-11
632617	2015-08-17	2015-08-28	2018-01-15	2020-06-24	20	20	16.5833	6.08881	11	0	0	0	1	1	0	0	0	1	3	4	4	7	7	1	1	36	2018-08-20	2018-04-02	2018-12-30	2018-12-30
632620	2015-08-14	2015-08-28		2017-08-17	17	17			10	0	0	0	1	2	0	1	0	1	3	3	3	4	4		9
632633	2015-08-17	2015-08-31	2017-04-23	2020-07-20	16	16	13	5.53525	9	0	0	0	1	1	0	1	1	1	2	4	4	3	3	2	2	36	2018-08-13	2018-07-03	2018-09-15	2018-09-15
632646	2015-08-19	2015-08-31		2015-08-31	16	16			10	0	0	0	1	1	0	0	1	1	2	3	3	4	4		9
632659	2015-08-17	2015-08-31	2018-01-05	2019-02-15	16	16	15.3333	3.1937	9	0	0	0	1	2	0	0	0	1	3	3	3	6	6	2	2
632662	2015-09-15	2015-09-23	2015-09-23	2020-07-23	18	18	14	4.32444	13	1	3000	2	2	2	1	1	1	1	3	4	4	4	4		9
632675	2015-09-16	2015-09-24	2015-09-29	2019-07-19	18	18	13	5.58727	12	1	1000	1	1	2	0	1	1	1	3	3	3	6	6	2	2	57	2020-06-08	2019-07-05	2020-04-15	2020-04-15
632688	2015-09-16	2015-09-24	2016-07-20	2018-07-16	17	17			7	0	0	0	1	2	0	1	0	1	3	3	3	8	7		9	18	2017-04-10	2016-10-01	2016-12-13	2016-12-13
632691	2015-09-16	2015-09-24	2017-08-28	2020-06-10	16	16	16.3333	2.56879	8	0	0	0	1	1	1	1	1	1	1	6	6	6	6		9
632705	2015-09-15	2015-09-25	2015-04-05	2017-12-18	19	19			13	1	3000	2	2	2	1	1	1	1	3	4	4	4	4		9	27	2017-12-18	2017-07-24		2017-12-18
632718	2015-09-17	2015-09-25	2019-05-28	2020-06-08	19	19	13	9.987	12	0	0	0	1	1	0	1	1	1	2	4	4	6	6		9	57	2020-06-09	2020-05-03		2020-06-08
632721	2015-09-18	2015-09-28	2018-07-01	2020-03-05	17	17	14	6.1232	10	1	1000	1	1	2	0	1	1	1	3	7	6	5	5	2	2
632734	2015-09-17	2015-09-28	2014-12-01	2018-05-15	19	19			12	0	0	0	1	1	1	1	1	1	1	7	6	5	5		9	21	2017-07-26	2016-11-04	2017-08-18	2017-08-18
632747	2015-09-18	2015-09-28	2018-10-10	2020-03-06	18	18	14	7.64545	10	0	0	0	1	1	0	1	1	1	2	3	3	5	5		9
632750	2015-09-18	2015-09-28		2017-06-27	18	18			10	0	0	0	1	1	0	0	1	1	2	2	2	4	4		9
632763	2015-09-17	2015-09-28	2015-09-28	2020-03-04	19	19	13	6.38672	12	0	0	0	2	1	1	1	1	1	1	1	1	3	3	1	1
632776	2015-09-18	2015-09-29	2015-02-10	2020-02-14	19	19	18	1.05818	13	1	1000	1	2	2	1	1	1	1	3	4	4	4	4	1	1
632789	2015-09-17	2015-10-02	2015-10-02	2017-04-13	19	19			13	1	3000	2	2	2	1	1	1	1	3	4	4	4	4		9
632792	2015-09-17	2015-10-02		2019-06-18	19	19	14		12	0	0	0	1	1	1	1	1	1	1	3	3	5	5		9
632806	2015-09-22	2015-10-06	2015-10-06	2020-03-13	19	19	16	3.90417	12	0	0	0	1	1	1	1	1	1	1	6	6	4	4	1	1
632819	2015-09-24	2015-10-06	2017-03-27	2018-03-26	19	19			12	0	0	0	1	1	1	1	1	1	1	3	3	4	4		9
632822	2015-09-23	2015-10-07	2015-11-25	2019-11-11	18	18	12	6.48323	13	0	0	0	2	1	1	1	1	1	1	4	4	4	4	1	1
632835	2015-09-28	2015-10-08		2018-10-01	16	16	14		12	0	0	0	2	2	1	1	1	1	3	1	1	6	6		9
632848	2015-09-24	2015-10-08	2015-02-10	2020-03-16	20	20	17	2.42779	12	0	0	0	2	1	1	1	1	1	1	2	2	5	5	2	2	48	2019-09-17	2019-05-06	2020-01-09	2020-01-09
632851	2015-09-24	2015-10-08	2014-12-21	2020-07-13	19	19	14	4.95688	12	0	0	0	1	1	0	1	1	1	2	4	4	7	7	1	1	57	2020-07-13	2019-06-14	2020-02-23	2020-02-23
632864	2015-09-23	2015-10-12	2017-06-02	2020-06-08	18	18	16	3.8193	12	0	0	0	1	1	0	1	1	1	2	8	6	10	7	1	1
632877	2015-09-30	2015-10-13	2015-03-10	2020-02-27	20	20	12.5833	7.00599	12	0	0	0	1	1	0	0	1	1	2	2	2	6	6	2	2	3	2016-02-01	2015-10-10	2016-08-01	2016-08-01
632880	2015-09-30	2015-10-13		2020-03-20	19	19	16		8	1	500	1	1	1	0	0	1	1	2	2	2	6	6		9
632893	2015-09-30	2015-10-13	2015-01-06	2019-12-03	19	19	15	3.72964	12	0	0	0	1	1	0	0	1	1	2	4	4	6	6	1	1	36	2018-10-04	2016-07-06	2016-07-08	2016-07-08
632907	2015-09-25	2015-10-13	2016-03-09	2020-07-03	18	18	15	3.5243	13	1	2000	2	2	2	1	1	1	1	3	5	5	4	4	1	1	57	2020-07-03	2020-05-15		2020-07-03
632910	2015-10-02	2015-10-14	2017-02-03	2020-03-16	17	17	13	5.61739	9	0	0	0	1	1	0	0	1	1	2	1	1	3	3		9	45	2019-06-25	2019-01-15	2019-10-03	2019-10-03
632923	2015-09-28	2015-10-14	2017-04-01	2020-03-17	16	16	14	3.80972	11	1	900	1	1	1	0	0	1	1	2	3	3	4	4	1	1	33	2018-08-01	2018-03-15	2018-04-13	2018-04-13
632936	2015-09-28	2015-10-15	2017-04-01	2017-04-26	16	16			9	0	0	0	2	2	1	1	1	1	3	1	1	5	5		9
632949	2015-10-05	2015-10-21	2014-12-01	2018-11-20	20	20	10	9.17591	13	1	1000	1	2	1	1	1	1	1	1	3	3	5	5	2	2	33	2018-07-26	2018-05-18		2018-11-20
632952	2015-10-12	2015-10-23		2019-04-18	19	19	15		12	0	0	0	2	1	1	1	0	1	3	4	4	6	6		9
632965	2015-10-02	2015-10-23	2015-10-15	2019-01-22	19	19	13	6.56194	13	1	1000	1	2	2	1	1	1	1	3	1	1	2	2	1	1	30	2018-05-09	2017-12-20	2018-10-01	2018-10-01
632978	2015-10-09	2015-10-26	2015-09-25	2016-05-16	18	18			13	1	1500	2	1	1	1	1	1	1	1	4	4	6	6		9	1	2015-12-05	2015-09-25	2016-06-21	2016-06-21
632981	2015-10-15	2015-10-27	2015-07-31	2017-10-31	20	20			14	0	0	0	2	1	1	1	1	1	1	5	5	4	4		9
632994	2015-10-21	2015-10-28		2020-03-11	20	20	14		13	0	0	0	1	1	0	1	0	1	3	6	6	5	5		9
633008	2015-10-28	2015-11-04	2015-04-19	2015-11-04	18	18			12	0	0	0	2	2	1	1	1	1	3	1	1	2	2		9
633011	2015-11-09	2015-11-19		2018-02-19	18	18			12	0	0	0	1	1	1	1	1	1	1	3	3	5	5		9
633024	2015-11-06	2015-11-19	2016-02-14	2020-06-22	16	16	13	3.31759	9	0	0	0	2	1	0	0	1	1	2	2	2	6	6	2	2	45	2019-08-01	2019-05-18	2020-03-23	2020-03-23
633037	2015-11-13	2015-11-19	2019-04-15	2020-06-10	16	16	15	4.50719	8	0	0	0	1	2	0	0	0	1	3	2	2	7	7		9	45	2019-08-13	2019-04-15	2020-01-25	2020-01-25
633040	2015-11-13	2015-11-20		2020-06-26	16	16	16		8	0	0	0	1	1	1	1	0	0	3	1	1	6	6		9
633053	2015-11-13	2015-11-20	2015-04-01	2020-06-08	20	20	17	2.96167	12	0	0	0	2	1	1	1	1	1	1	3	3	5	5	1	1
633066	2015-11-13	2015-11-24		2017-11-16	18	18			10	1	500	1	1	2	0	0	0	1	3	2	2	4	4		9
633079	2015-11-16	2015-11-25		2020-07-02	17	17	12		12	0	0	0	1	1	1	1	1	1	1	8	6	5	5		9
633082	2015-11-17	2015-11-25	2015-06-21	2020-06-26	20	20	14	6.04928	12	1	1000	1	2	2	1	1	1	1	3	2	2	3	3	2	2	9	2016-09-08	2016-06-01	2017-03-15	2017-03-15
633095	2015-11-18	2015-11-27	2015-10-01	2020-07-08	18	18	16	1.91102	13	1	1500	2	2	1	1	1	1	1	1	3	3	4	4	1	1	18	2017-05-22	2017-03-01	2017-12-05	2017-12-05
633109	2015-11-17	2015-11-27	2016-07-01	2020-06-22	16	16	14	2.84326	10	1	500	1	2	2	0	0	1	1	3	2	2	4	4	1	1
633112	2015-11-18	2015-11-27	2014-12-01	2015-11-27	18	18			12	0	0	0	1	2	0	1	0	1	3	1	1	5	5		9
633125	2015-11-17	2015-11-27		2020-06-05	17	17	13		12	0	0	0	1	1	0	1	1	1	2	5	5	6	6		9
633138	2015-11-19	2015-11-30	2016-02-20	2020-02-12	19	19	15.75	4.05014	12	0	0	0	1	1	1	0	1	1	2	3	3	3	3	1	1	12	2016-11-24	2016-10-10	2017-02-24	2017-02-24
633141	2015-11-18	2015-11-30	2019-03-08	2020-06-03	16	16	16	4.22724	8	0	0	0	1	1	0	0	1	1	2	2	2	5	5		9
633154	2015-11-19	2015-11-30	2016-11-06	2020-06-03	16	16	14	3.81246	11	0	0	0	2	2	0	1	1	1	3	5	5	3	3	1	1	36	2018-11-17	2018-06-21	2019-03-27	2019-03-27
633167	2015-11-18	2015-11-30	2015-03-01	2017-04-25	19	19			12	0	0	0	2	1	1	1	0	1	3	2	2	4	4		9	3	2016-04-08	2016-03-05	2016-08-14	2016-08-14
633170	2015-11-18	2015-11-30	2015-10-10	2018-09-13	20	20			12	0	0	0	2	2	1	1	1	1	3	4	4	3	3		9	24	2018-01-02	2017-07-23	2018-05-10	2018-05-10
633183	2015-11-20	2015-12-01	2016-03-15	2020-03-25	19	19	15.6667	3.85147	12	0	0	0	2	1	1	1	1	1	1	3	3	3	3	1	1
633196	2015-11-20	2015-12-01	2017-09-15	2020-02-10	18	18	15	5.62423	12	0	0	0	2	1	1	1	1	1	1	5	5	3	3	2	2	27	2018-02-19	2018-01-09	2018-03-15	2018-03-15
633200	2015-11-23	2015-12-02		2020-06-11	18	18	14		14	0	0	0	2	1	1	1	1	1	1	4	4	6	6		9
633213	2015-11-23	2015-12-02		2016-03-08	18	18			12	0	0	0	1	1	1	1	1	1	1	6	6	5	5		9
633226	2015-11-23	2015-12-03		2016-08-29	18	18			12	0	0	0	1	1	1	1	1	1	1	5	5	7	7		9
633239	2015-11-23	2015-12-03	2016-01-15	2016-05-31	18	19			12	0	0	0	1	1	1	1	1	1	1	3	3	5	5		9
633242	2015-11-23	2015-12-03	2016-03-03	2018-08-28	18	18			12	0	0	0	1	1	1	1	1	1	1	7	6	4	4		9
633255	2015-11-24	2015-12-09	2016-07-17	2020-03-10	18	18	14	5.5154	12	0	0	0	1	1	1	1	0	1	3	4	4	5	5	2	2
633268	2015-11-24	2015-12-08	2015-12-08	2018-11-14	16	16	14	2.29569	10	0	0	0	1	1	1	1	1	1	1	4	4	6	6		9
633271	2015-11-23	2015-12-08	2015-04-01	2016-09-09	19	19			13	0	0	0	2	1	1	1	1	1	1	4	4	5	5		9
633284	2015-11-27	2015-12-08	2016-07-05	2020-01-31	20	20	14.1667	6.53149	12	0	0	0	1	1	1	1	1	1	1	2	2	4	4	1	1
633297	2015-11-27	2015-12-08	2015-12-27	2020-03-23	19	19	17	2.45243	11	1	1000	1	1	2	0	0	0	1	3	1	1	2	2	1	1	3	2016-03-07	2015-12-27	2016-09-09	2016-09-09
633301	2015-11-24	2015-12-09	2015-11-01	2019-10-15	18	18	14.0833	3.95637	12	0	0	0	1	1	1	1	1	1	1	5	5	3	3	1	1
633314	2015-11-26	2015-12-09	2015-12-09	2018-07-23	16	16			0	0	0	0	1	1	0	1	1	1	2	3	3	4	4		9	33	2018-07-26	2017-06-07	2018-06-23	2018-06-23
633327	2015-11-24	2015-12-09		2016-04-07	19	19			12	0	0	0	1	2	0	0	0	1	3	3	3	6	6		9
633330	2015-11-26	2015-12-09		2020-03-11	18	18			11	0	0	0	1	1	1	1	1	1	1	4	4	6	6		9
633343	2015-11-27	2015-12-09	2016-09-14	2019-05-22	18	18	13	5.86653	12	1	1500	2	2	1	0	0	1	1	2	1	1	3	3	2	2
633356	2015-11-25	2015-12-10		2016-04-27	16	17			11	0	0	0	1	1	0	1	0	1	3	6	6	7	7		9
633369	2015-11-25	2015-12-10	2016-04-18	2018-10-12	17	17			11	0	0	0	1	1	0	1	0	1	3	6	6	7	7		9
633372	2015-11-26	2015-12-10	2014-12-23	2020-06-26	17	17	14	2.63792	10	0	0	0	1	1	0	0	0	1	3	4	4	6	6	2	2	30	2018-04-20	2018-01-01	2018-10-09	2018-10-09
633385	2015-11-25	2015-12-10		2015-12-15	20	20			12	0	0	0	1	1	0	0	0	1	3	5	5	6	6		9
633398	2015-11-27	2015-12-11	2016-12-31	2020-06-04	18	18	13	6.5154	11	1	500	1	1	2	0	0	1	1	3	1	1	3	3	2	2
633402	2015-11-25	2015-12-11	2017-03-15	2018-03-20	19	19			12	0	0	0	1	1	1	1	1	1	1	4	4	3	3		9
633415	2015-11-24	2015-12-11		2016-04-11	18	18			11	0	0	0	1	1	1	1	1	1	1	3	3	4	4		9
633428	2015-11-25	2015-12-11	2017-04-16	2020-06-23	16	16	14.4167	3.32187	11	0	0	0	1	1	0	0	0	0	3	3	3	5	5	2	2	30	2018-07-03	2018-03-28	2018-12-26	2018-12-26
633431	2015-11-27	2015-12-11	2015-11-01	2020-02-14	18	18	12	6.05613	12	1	1000	1	2	2	0	1	1	1	3	2	2	5	5	2	2
633444	2015-11-27	2015-12-14	2015-04-01	2020-06-03	20	20	14	5.92882	12	0	0	0	1	2	0	0	1	1	3	2	2	3	3	1	1
633457	2015-11-25	2015-12-14	2014-07-01	2020-06-23	16	16	14	0.924025	8	0	0	0	1	1	0	0	0	1	3	2	2	6	6	1	1	6	2016-07-11	2016-02-15	2016-10-19	2016-10-19
633460	2015-11-25	2015-12-14		2017-04-27	18	18			10	0	0	0	1	1	1	1	1	1	1	5	5	4	4		9
633473	2015-11-27	2015-12-14	2016-10-01	2020-03-31	19	19	16	4.13689	12	0	0	0	2	2	1	1	1	1	3	4	4	4	4	2	2
633486	2015-11-25	2015-12-14	2015-07-21	2020-06-10	18	18	13	5.1191	8	0	0	0	1	2	0	0	0	1	3	3	3	5	5	1	1
633499	2015-11-26	2015-12-14	2016-03-15	2016-12-09	18	18			10	0	0	0	1	1	1	0	0	1	3	2	2	5	5		9
633503	2015-11-30	2015-12-15	2017-04-06	2019-10-25	17	17	17	1.54894	9	1	1000	1	1	2	0	0	1	1	3	3	3	3	3	1	1	24	2017-12-19	2017-08-10	2018-05-08	2018-05-08
633516	2015-11-30	2015-12-15	2019-01-10	2020-06-10	18	18	14	8.02053	12	0	0	0	2	1	1	1	1	1	1	2	2	3	3		9
633529	2015-11-30	2015-12-15	2016-07-01	2018-09-04	16	16			11	0	0	0	2	1	0	0	0	1	3	3	3	7	7		9
633532	2015-11-30	2015-12-15	2014-12-01	2020-03-02	18	18	14	3.56879	12	0	0	0	2	2	0	1	0	1	3	3	3	6	6	1	1	51	2020-03-02	2019-10-19	2020-07-31	2020-07-31
633545	2015-11-30	2015-12-16		2020-06-05	16	16	14		10	1	1000	1	2	2	0	0	1	1	3	2	2	4	4		9
633558	2015-11-26	2015-12-16	2017-08-27	2017-12-07	16	16			11	0	0	0	1	1	0	0	0	1	3	3	3	5	5		9
633561	2015-12-01	2015-12-16	2015-08-01	2019-11-25	17	17	17	0.609856	12	1	1000	1	1	2	0	0	1	1	3	3	3	3	3	2	2
633574	2015-12-02	2015-12-17	2015-04-04	2020-07-01	17	17	14	2.95825	9	0	0	0	2	2	0	0	0	1	3	2	2	4	4	1	1	42	2019-06-25	2019-05-21	2019-06-15	2019-06-15
633587	2015-12-01	2015-12-17	2016-06-05	2019-11-26	19	19	13	6.84121	12	0	0	0	2	2	0	0	1	1	3	2	2	4	4	1	1
633590	2015-12-01	2015-12-17	2016-12-08	2020-06-22	18	18	14	5.18412	11	0	0	0	2	1	1	1	1	1	1	3	3	4	4		9
633604	2015-12-01	2015-12-17	2015-05-01	2019-05-03	17	17	14	3.26215	8	0	0	0	1	1	0	0	0	1	3	1	1	7	7	2	2	15	2017-03-23	2017-01-01	2017-10-03	2017-10-03
633617	2015-12-03	2015-12-18	2018-04-15	2020-06-19	18	18	17.8333	3.37406	11	0	0	0	1	1	0	0	1	1	2	3	3	5	5	1	1	33	2018-08-13	2018-07-10	2019-04-01	2019-04-01
633620	2015-12-03	2015-12-18	2015-08-29	2020-07-17	18	18	12	6.57906	11	0	0	0	1	1	0	0	0	1	3	3	3	3	3	1	1
633633	2015-12-03	2015-12-18		2020-03-06	16	16	13		11	0	0	0	1	1	0	0	0	1	3	3	3	2	2		9
633646	2015-12-03	2015-12-18	2016-05-26	2017-02-14	18	18			12	0	0	0	1	2	1	1	1	1	3	4	4	7	7		9	9	2016-10-17	2016-05-26	2016-12-23	2016-12-23
633659	2015-12-02	2015-12-21	2017-10-10	2018-04-13	17	17			11	0	0	0	1	1	0	1	1	1	2	4	4	4	4		9
633662	2015-12-03	2015-12-21	2015-04-01	2020-06-05	18	18	15.5	2.57803	10	0	0	0	2	2	0	1	0	1	3	1	1	2	2	2	2	3	2016-03-07	2015-11-23	2016-05-15	2016-05-15
633675	2015-12-14	2016-01-04		2018-07-02	16	17			11	0	0	0	1	1	1	1	1	1	1	3	3	4	4		9
633688	2015-12-17	2016-01-04	2019-03-26	2019-09-12	17	17	14	6.85695	10	1	500	1	1	1	0	1	1	1	2	7	6	5	5		9
633691	2015-12-18	2016-01-04		2017-07-26	16	16			11	0	0	0	1	1	0	0	0	0	3	3	3	4	4		9
633705	2016-01-07	2016-01-13	2015-05-01	2018-11-20	20	20	15	4.34018	12	0	0	0	2	2	1	1	1	1	3	6	6	4	4	2	2	9	2016-10-17	2016-07-18	2016-11-01	2016-11-01
633718	2016-01-07	2016-01-14	2015-04-01	2020-03-10	19	19	13	5.93224	11	1	12000	2	2	1	1	1	1	1	1	6	6	3	3	1	1	6	2016-08-16	2016-04-21	2017-01-18	2017-01-18
633721	2016-01-04	2016-01-14	2017-05-15	2020-05-12	18	18	14	6.08761	14	0	0	0	1	1	0	0	0	1	3	3	3	5	5	2	2	24	2017-12-08	2017-09-22	2018-06-22	2018-06-22
633734	2016-01-04	2016-01-14	2016-12-31	2020-07-24	16	16	14	3.06502	9	0	0	0	2	1	0	0	1	1	2	2	2	3	3	1	1
633747	2016-01-12	2016-01-28	2016-11-25	2020-06-23	17	17	14	4.46133	12	1	1000	1	1	2	0	1	1	1	3	4	4	6	6	1	1
633750	2016-01-22	2016-01-29	2016-07-01	2016-10-25	20	20			13	0	0	0	2	2	1	1	1	1	3	4	4	5	5		9
633763	2016-01-26	2016-02-03	2016-01-15	2019-07-09	19	19	12.4167	7.49298	13	1	5000	2	1	1	1	1	1	1	1	3	3	4	4	1	1
633776	2016-01-26	2016-02-03	2015-11-01	2020-04-20	18	18			12	1	6000	2	2	2	1	1	1	1	3	1	1	2	2	1	1
633789	2016-01-27	2016-02-04	2013-01-01	2016-02-04	17	17			12	1	200	1	2	2	1	1	1	1	3	3	3	7	7		9
633792	2016-01-27	2016-02-04		2016-02-04	18	18			12	0	0	0	2	1	1	1	1	1	1	5	5	5	5		9
633806	2016-01-27	2016-02-04	2015-12-01	2020-07-06	19	19	13	5.84463	12	1	7000	2	2	1	0	0	0	0	3	4	4	5	5	1	1	36	2019-01-21	2018-12-22	2019-04-26	2019-04-26
633819	2016-01-29	2016-02-05	2015-12-01	2020-03-16	17	17	13	3.88433	11	0	0	0	2	1	1	1	1	1	1	1	1	6	6	2	2	30	2018-09-07	2018-07-30	2019-04-23	2019-04-23
633822	2016-02-01	2016-02-10	2016-10-25	2020-06-11	18	18	14	4.82546	12	1	500	1	2	2	0	1	1	1	3	4	4	5	5	2	2
633835	2016-02-01	2016-02-10	2017-02-19	2019-02-01	18	18	17	2.92608	12	0	0	0	2	2	1	1	1	1	3	2	2	5	5	2	2
633848	2016-02-01	2016-02-11	2016-02-11	2020-06-08	18	18	12	6.48871	12	0	0	0	2	2	1	1	1	1	3	1	1	2	2	2	2
633851	2016-02-01	2016-02-11	2015-11-01	2020-07-29	18	18	14	4.30801	12	1	1000	1	2	1	1	1	1	1	1	3	3	5	5	1	1
633864	2016-02-01	2016-02-11		2019-07-26	18	18	13		12	0	0	0	2	2	1	1	1	1	3	4	4	3	3		9
633877	2016-02-12	2016-02-19	2017-04-14	2020-07-28	18	18	13	6.98357	12	0	0	0	2	1	1	1	1	1	1	3	3	4	4	2	2
633880	2016-02-17	2016-02-24	2015-10-23	2020-03-10	18	18	14	3.75222	12	0	0	0	2	2	1	1	1	1	3	3	3	5	5	1	1
633893	2016-02-12	2016-02-29	2016-02-14	2020-06-10	18	18	13	5.28611	12	0	0	0	1	1	1	1	1	1	1	1	1	4	4	1	1	18	2017-07-17	2016-09-13	2017-06-16	2017-06-16
633907	2016-02-22	2016-03-04		2019-02-28	20	20	17		12	0	0	0	1	2	0	1	1	1	3	3	3	5	5		9
633910	2016-03-22	2016-04-01	2015-12-01	2020-06-11	18	18	14	3.89186	12	0	0	0	2	1	1	1	1	1	1	1	1	3	3	1	1
633923	2016-04-08	2016-04-13	2015-12-31	2020-03-24	18	18	13	5.56263	12	0	0	0	1	1	0	1	0	1	3	1	1	2	2	2	2
633936	2016-04-14	2016-04-21	2016-03-03	2020-06-03	17	17	12	5.04586	12	0	0	0	2	1	1	1	1	1	1	1	1	3	3	1	1	12	2017-04-05	2017-01-07	2017-05-29	2017-05-29
633949	2016-04-15	2016-04-21	2017-09-10	2019-04-04	20	20	13	9.32717	12	0	0	0	2	1	1	1	1	1	1	1	1	2	2	1	1
633952	2016-04-13	2016-04-21	2016-04-28	2020-03-31	16	16	12	4.17796	10	0	0	0	2	1	1	1	1	1	1	4	4	5	5		9
633965	2016-04-13	2016-04-21	2016-12-27	2020-03-06	16	16	13	3.7447	10	0	0	0	1	1	0	1	1	1	2	3	3	5	5	1	1
633978	2016-04-14	2016-04-22		2020-07-02	16	16	16		10	0	0	0	2	1	1	1	1	1	1	4	4	7	7		9
633981	2016-04-15	2016-04-22	2018-02-09	2018-10-24	19	19			13	0	0	0	1	1	1	1	1	1	1	3	3	5	5		9
633994	2016-04-08	2016-04-22	2016-04-22	2019-10-07	17	18	13	5.01506	12	0	0	0	2	1	1	1	1	1	1	2	2	3	3	1	1	21	2018-01-15	2017-12-02	2018-09-02	2018-09-02
634008	2016-04-14	2016-04-22	2016-04-22	2020-06-22	17	17	14	3.10883	11	1	500	1	1	2	1	1	1	1	3	3	3	2	2	2	2	30	2018-10-05	2018-06-17	2018-12-17	2018-12-17
