# Supplementary material for: Starting to have sexual intercourse is associated with increases in cervicovaginal immune mediators in young women: a prospective study and meta-analysis
Source: eLife journal article supplement (doi:10.7554/elife.78565), 2022-10-06
Supplement: code1 [file cytokine_lookup.xlsx]

## Sheet: x
Unified name	Us	Ghosh-2018	Jespers-2016
IFN-a2a	IFN-a2a
IFNg	IFNg
IL-10	IL-10
IL-12p70	IL-12p70
IL-17A	IL-17A
IL-18	IL-18
IL-1a	IL-1a	IL-1α	il1a
IL-1b	IL-1ß	IL-1β	il1b
IL-2	IL-2
IL-6	IL-6	IL-6	il6
IL-7	IL-7
CXCL8	IL-8	IL-8	il8
IL-1RA	IL1-RA
CXCL10	IP-10		ip10
CXCL9	MIG
CCL3	MIP-1a
CCL4	MIP-1ß		mipb
CCL20	MIP-3a	MIP-3α
CCL5	RANTES		rantes
TNF	TNF-a	TNF-α
Elafin		Elafin
HBD-2		HBD-2
MMP-1		MMP-1
MMP-2		MMP-2
MMP-7		MMP-7
MMP-8		MMP-8
MMP-9		MMP-9
SLPI		SLPI
TIMP-1		TIMP-1
TIMP-2		TIMP-2
