# Supplementary material for: Starting to have sexual intercourse is associated with increases in cervicovaginal immune mediators in young women: a prospective study and meta-analysis
Source: eLife journal article supplement (doi:10.7554/elife.78565), 2022-10-06
Supplement: code1 [file LODs.xlsx]

## Sheet: Sheet1
Analyte	Platform	LLOD (pg/mL)	Dilution
RANTES	R-plex	0.25	Yes
MIG	R-plex	0.21	Yes
IL1-RA	U-plex	1.7	Yes
TNF-a	U-plex	0.51
IL-8	U-plex	0.15
IL-6	U-plex	0.33
IL-2	U-plex	0.7
IL-1ß	U-plex	0.15
IL-12p70	U-plex	0.69
IL-10	U-plex	0.14
IFNg	U-plex	1.7
MIP-3a	U-plex	1.8
MIP-1ß	U-plex	1.5
MIP-1a	U-plex	7.7
IP-10	U-plex	0.49
IL-7	U-plex	1.5
IL-1a	U-plex	0.98
IL-18	U-plex	2.5
IL-17A	U-plex	2.6
IFN-a2a	U-plex	4
