# Supplementary material for: Starting to have sexual intercourse is associated with increases in cervicovaginal immune mediators in young women: a prospective study and meta-analysis
Source: eLife. 2022 Oct 25;11:e78565. doi: 10.7554/eLife.78565 (PMC9596159; doi:10.7554/eLife.78565)
Supplement: Supplementary file 1. — The results of the main analyses reported in the paper, including complete effect sizes, measures of variance, and p-values. [file elife-78565-supp1.xlsx]

## Sheet: Univariate
Assay	Difference	StdError	Ratio95CI	ModelOutcome	Units	Lower95Ci	Upper95Ci	Df	T	PValue	Z	HolmBonferroniAdjusted	Study	N	I2
IL-2	0.896682	0.251097	1.86 (1.32-2.62)	pg/mL	Log2 concentration	0.404532	1.38883	161.507	3.57105	0.000468687		0.00890506
IL-1b	1.32828	0.431103	2.51 (1.4-4.51)	pg/mL	Log2 concentration	0.483319	2.17324	164.819	3.08112	0.00241731		0.0435115
CXCL8	1.01456	0.332707	2.02 (1.29-3.17)	pg/mL	Log2 concentration	0.362458	1.66667	174.462	3.04942	0.00265032		0.0450555
IL-1a	0.669155	0.237702	1.59 (1.15-2.2)	pg/mL	Log2 concentration	0.203258	1.13505	154.78	2.81509	0.00551068		0.0881709
CCL3	0.617135	0.222163	1.53 (1.13-2.07)	pg/mL	Log2 concentration	0.181694	1.05258	175.007	2.77784	0.00606914		0.0910371
IL-17A	0.638324	0.248186	1.56 (1.11-2.18)	pg/mL	Log2 concentration	0.15188	1.12477	161.817	2.57196	0.0110118		0.154165
TNF	0.686536	0.291545	1.61 (1.08-2.39)	pg/mL	Log2 concentration	0.115107	1.25796	168.146	2.35482	0.019686		0.236232
CXCL10	0.738879	0.317828	1.67 (1.08-2.57)	pg/mL	Log2 concentration	0.115937	1.36182	169.6	2.32478	0.0212685		0.236232
CXCL9	0.5966	0.256945	1.51 (1.07-2.14)	pg/mL	Log2 concentration	0.0929878	1.10021	172.8	2.3219	0.021405		0.236232
IL-1RA	0.478215	0.221228	1.39 (1.03-1.88)	pg/mL	Log2 concentration	0.0446087	0.911822	145.618	2.16164	0.03228		0.25824
IL-6	0.806836	0.391008	1.75 (1.03-2.98)	pg/mL	Log2 concentration	0.0404593	1.57321	166.099	2.06347	0.0406234		0.284364
CCL4	0.416098	0.269181	1.33 (0.93-1.92)	pg/mL	Log2 concentration	-0.111497	0.943693	161.784	1.54579	0.124108		0.620542
CCL20	0.525351	0.359246	1.44 (0.88-2.34)	pg/mL	Log2 concentration	-0.178772	1.22947	167.732	1.46237	0.145511		0.620542
CCL5	0.38997	0.279892	1.31 (0.9-1.92)	pg/mL	Log2 concentration	-0.158619	0.938559	156.276	1.39329	0.165512		0.620542
IL-18	0.437718	0.364728	1.35 (0.83-2.22)	pg/mL	Log2 concentration	-0.27715	1.15258	168.132	1.20012	0.231781		0.620542
IL-7	0.0183681	0.183864	1.01 (0.79-1.3)	pg/mL	Log2 concentration	-0.342006	0.378742	173.628	0.0999005	0.920539		0.920539
IL-10	1.14879	0.45657	3.15 (1.29-7.72)	Detectable	Log-odds	0.253918	2.04367			0.0118647	2.51614	0.154241
IFNg	1.03796	0.461901	2.82 (1.14-6.98)	Detectable	Log-odds	0.132629	1.94328			0.0246313	2.24714	0.236232
IL-12p70	2.0181	1.02946	7.52 (1-56.59)	Detectable	Log-odds	0.00035819	4.03584			0.0499551	1.96035	0.299731

## Sheet: Univariate (pg per mg protein)
Assay	Difference	StdError	Ratio95CI	ModelOutcome	Units	Lower95Ci	Upper95Ci	Df	T	PValue	Z	HolmBonferroniAdjusted	Study	N	I2
IL-1b	1.18336	0.410626	2.27 (1.3-3.97)	pg/mg protein	Log2 concentration	0.378533	1.98819	167.915	2.88184	0.00447029		0.0715247
IL-2	0.734859	0.270082	1.66 (1.15-2.4)	pg/mg protein	Log2 concentration	0.2055	1.26422	167.88	2.72088	0.007197		0.107955
CXCL8	0.834736	0.313608	1.78 (1.16-2.73)	pg/mg protein	Log2 concentration	0.220065	1.44941	175.684	2.66172	0.00849531		0.118934
IL-1a	0.528871	0.230049	1.44 (1.06-1.97)	pg/mg protein	Log2 concentration	0.0779753	0.979766	162.781	2.29895	0.022779		0.296127
CXCL10	0.528412	0.283571	1.44 (0.98-2.12)	pg/mg protein	Log2 concentration	-0.0273874	1.08421	164.693	1.86342	0.0641837		0.770205
CXCL9	0.402815	0.224486	1.32 (0.97-1.79)	pg/mg protein	Log2 concentration	-0.0371777	0.842809	175.432	1.79439	0.0744732		0.819205
IL-17A	0.435635	0.262305	1.35 (0.95-1.93)	pg/mg protein	Log2 concentration	-0.0784822	0.949753	160.289	1.6608	0.0987089		0.987089
IL-6	0.608582	0.368167	1.52 (0.92-2.51)	pg/mg protein	Log2 concentration	-0.113026	1.33019	164.559	1.653	0.100237		0.987089
CCL3	0.404813	0.249431	1.32 (0.94-1.86)	pg/mg protein	Log2 concentration	-0.0840728	0.893698	173.707	1.62294	0.106415		0.987089
TNF	0.480187	0.310202	1.39 (0.92-2.13)	pg/mg protein	Log2 concentration	-0.127809	1.08818	166.087	1.54798	0.12353		0.987089
IL-1RA	0.286575	0.225456	1.22 (0.9-1.66)	pg/mg protein	Log2 concentration	-0.155318	0.728468	144.877	1.27109	0.205732		1
CCL20	0.33524	0.326607	1.26 (0.81-1.97)	pg/mg protein	Log2 concentration	-0.304909	0.97539	165.596	1.02643	0.306184		1
IL-7	-0.180206	0.217073	0.88 (0.66-1.19)	pg/mg protein	Log2 concentration	-0.605669	0.245256	173.411	-0.830165	0.407587		1
CCL5	0.201994	0.280005	1.15 (0.79-1.68)	pg/mg protein	Log2 concentration	-0.346816	0.750804	157.021	0.721394	0.47174		1
CCL4	0.20251	0.285842	1.15 (0.78-1.7)	pg/mg protein	Log2 concentration	-0.357741	0.76276	158.063	0.708466	0.479699		1
IL-18	0.236601	0.373926	1.18 (0.71-1.96)	pg/mg protein	Log2 concentration	-0.496295	0.969496	167.996	0.632747	0.527759		1

## Sheet: Univariate-subset
Assay	Difference	StdError	Ratio95CI	ModelOutcome	Units	Lower95Ci	Upper95Ci	Df	T	PValue	Z	HolmBonferroniAdjusted	Study	N	I2
CCL3	1.08573	0.270142	2.12 (1.47-3.06)	pg/mL	Log2 concentration	0.556256	1.61521	129.339	4.01912	9.86003e-05		0.0018734
IL-17A	1.15386	0.3044	2.23 (1.47-3.36)	pg/mL	Log2 concentration	0.557235	1.75048	126.467	3.7906	0.000231525		0.00416745
IL-1b	1.69966	0.547398	3.25 (1.54-6.83)	pg/mL	Log2 concentration	0.626757	2.77256	129.134	3.10497	0.00233927		0.0397676
IL-2	1.00325	0.337339	2 (1.27-3.17)	pg/mL	Log2 concentration	0.342061	1.66443	131.728	2.974	0.00349697		0.0559515
CCL4	0.97911	0.335041	1.97 (1.25-3.11)	pg/mL	Log2 concentration	0.32243	1.63579	115.777	2.92236	0.00417846		0.0626769
IL-1a	0.765527	0.263546	1.7 (1.19-2.43)	pg/mL	Log2 concentration	0.248978	1.28208	113.584	2.90472	0.0044187		0.0626769
CXCL8	1.22623	0.423838	2.34 (1.32-4.16)	pg/mL	Log2 concentration	0.395508	2.05695	130.743	2.89316	0.00446941		0.0626769
CXCL10	1.00831	0.353805	2.01 (1.24-3.25)	pg/mL	Log2 concentration	0.314853	1.70177	134.991	2.8499	0.00505968		0.0626769
IL-6	1.37187	0.500062	2.59 (1.31-5.11)	pg/mL	Log2 concentration	0.391752	2.352	122.723	2.74341	0.00699221		0.0769144
CCL20	1.05725	0.445964	2.08 (1.14-3.81)	pg/mL	Log2 concentration	0.183158	1.93134	123.392	2.3707	0.019303		0.19303
CXCL9	0.681453	0.308166	1.6 (1.06-2.44)	pg/mL	Log2 concentration	0.0774475	1.28546	128.621	2.21132	0.0287804		0.230243
TNF	0.799257	0.371702	1.74 (1.05-2.88)	pg/mL	Log2 concentration	0.0707213	1.52779	132.101	2.15026	0.0333555		0.233488
IL-18	0.8765	0.462711	1.84 (0.98-3.44)	pg/mL	Log2 concentration	-0.0304145	1.78341	124.743	1.89427	0.0605046		0.363028
CCL5	0.653306	0.37327	1.57 (0.95-2.61)	pg/mL	Log2 concentration	-0.0783025	1.38492	126.699	1.75023	0.0825002		0.412501
IL-1RA	0.468281	0.273052	1.38 (0.95-2)	pg/mL	Log2 concentration	-0.0669	1.00346	119.941	1.71499	0.0889293		0.412501
IL-7	0.0375005	0.233303	1.03 (0.75-1.41)	pg/mL	Log2 concentration	-0.419774	0.494775	133.004	0.160737	0.872544		0.872544
IL-10	1.75893	0.762664	5.81 (1.3-25.89)	Detectable	Log-odds	0.264103	3.25375			0.0210944	2.30629	0.19303
IFNg	1.11405	0.65134	3.05 (0.85-10.92)	Detectable	Log-odds	-0.162578	2.39068			0.0871929	1.71039	0.412501
IL-12p70	1.51725	1.13133	4.56 (0.5-41.87)	Detectable	Log-odds	-0.700149	3.73465			0.17988	1.34113	0.412501

## Sheet: Univariate-fully-paired
Assay	Difference	StdError	Ratio95CI	ModelOutcome	Units	Lower95Ci	Upper95Ci	Df	T	PValue	Z	HolmBonferroniAdjusted	Study	N	I2
IL-2	0.639118	0.352458	1.56 (0.96-2.51)	pg/mL	Log2 concentration	-0.0517007	1.32994	32	1.81331	0.0791727		1
CCL20	0.601092	0.500728	1.52 (0.77-2.99)	pg/mL	Log2 concentration	-0.380335	1.58252	32	1.20044	0.238781		1
CXCL9	0.457362	0.390045	1.37 (0.81-2.33)	pg/mL	Log2 concentration	-0.307126	1.22185	32	1.17259	0.249616		1
CXCL10	0.488065	0.434588	1.4 (0.78-2.53)	pg/mL	Log2 concentration	-0.363728	1.33986	32	1.12305	0.269771		1
IL-18	-0.433846	0.481751	0.74 (0.38-1.42)	pg/mL	Log2 concentration	-1.37808	0.510386	32	-0.900561	0.37455		1
IL-1a	0.262128	0.301821	1.2 (0.8-1.81)	pg/mL	Log2 concentration	-0.329442	0.853698	32	0.868488	0.391595		1
IL-6	0.396807	0.512675	1.32 (0.66-2.64)	pg/mL	Log2 concentration	-0.608037	1.40165	32	0.773992	0.444616		1
CXCL8	0.328853	0.508973	1.26 (0.63-2.51)	pg/mL	Log2 concentration	-0.668733	1.32644	32	0.646112	0.522814		1
IL-1b	0.352823	0.669534	1.28 (0.51-3.17)	pg/mL	Log2 concentration	-0.959463	1.66511	32	0.526968	0.60185		1
IL-1RA	0.136457	0.264834	1.1 (0.77-1.58)	pg/mL	Log2 concentration	-0.382618	0.655531	32	0.515254	0.609917		1
IL-7	-0.0928339	0.246698	0.94 (0.67-1.31)	pg/mL	Log2 concentration	-0.576361	0.390693	64	-0.376307	0.707934		1
CCL5	-0.108861	0.33518	0.93 (0.59-1.46)	pg/mL	Log2 concentration	-0.765813	0.548091	32	-0.324784	0.747459		1
CCL3	0.0944688	0.314732	1.07 (0.7-1.64)	pg/mL	Log2 concentration	-0.522407	0.711344	32	0.300156	0.766		1
CCL4	-0.110518	0.38082	0.93 (0.55-1.55)	pg/mL	Log2 concentration	-0.856924	0.635889	32	-0.29021	0.773528		1
TNF	0.113823	0.418255	1.08 (0.61-1.91)	pg/mL	Log2 concentration	-0.705957	0.933602	32	0.272138	0.787264		1
IL-17A	-0.00700103	0.309389	1 (0.65-1.52)	pg/mL	Log2 concentration	-0.613404	0.599402	32	-0.0226285	0.982087		1
IL-12p70	5.42439	2.47227	226.87 (1.78-28854.95)	Detectable	Log-odds	0.57874	10.27			0.0282287	2.19409	0.536346
IFNg	-0.216829	0.660681	0.81 (0.22-2.94)	Detectable	Log-odds	-1.51176	1.07811			0.742768	-0.328191	1
IL-10	9.85294e-06	0.711334	1 (0.25-4.03)	Detectable	Log-odds	-1.39421	1.39423			0.999989	1.38514e-05	1

## Sheet: Multivariate
Assay	Difference	StdError	Ratio95CI	ModelOutcome	Units	Lower95Ci	Upper95Ci	Df	T	PValue	Z	HolmBonferroniAdjusted	Study	N	I2
IL-2	0.783388	0.265414	1.72 (1.2-2.47)	pg/mL	Log2 concentration	0.263177	1.3036	153.488	2.95157	0.00365827		0.0695072
IL-1b	1.1031	0.452276	2.15 (1.16-3.97)	pg/mL	Log2 concentration	0.216635	1.98956	158.395	2.43899	0.0158329		0.284993
CXCL8	0.821784	0.351255	1.77 (1.1-2.85)	pg/mL	Log2 concentration	0.133325	1.51024	167.199	2.33957	0.0204878		0.348292
CXCL9	0.631584	0.275084	1.55 (1.07-2.25)	pg/mL	Log2 concentration	0.0924183	1.17075	164.224	2.29596	0.0229422		0.367075
IL-1a	0.574113	0.251345	1.49 (1.06-2.09)	pg/mL	Log2 concentration	0.081477	1.06675	147.365	2.28416	0.0237903		0.367075
IL-17A	0.587315	0.260705	1.5 (1.05-2.14)	pg/mL	Log2 concentration	0.0763333	1.0983	154.961	2.2528	0.025676		0.367075
CXCL10	0.753441	0.335875	1.69 (1.07-2.66)	pg/mL	Log2 concentration	0.0951266	1.41175	162.759	2.24322	0.0262321		0.367075
CCL3	0.507381	0.23304	1.42 (1.04-1.95)	pg/mL	Log2 concentration	0.0506215	0.96414	168.676	2.17722	0.0308533		0.37024
IL-1RA	0.431138	0.233361	1.35 (0.98-1.85)	pg/mL	Log2 concentration	-0.0262495	0.888525	140.015	1.84752	0.0667828		0.734611
IL-6	0.721581	0.414737	1.65 (0.94-2.9)	pg/mL	Log2 concentration	-0.0913027	1.53446	158.339	1.73985	0.0838278		0.838278
TNF	0.535994	0.308634	1.45 (0.95-2.21)	pg/mL	Log2 concentration	-0.0689288	1.14092	159.63	1.73667	0.0843754		0.838278
IL-18	0.458013	0.383912	1.37 (0.82-2.31)	pg/mL	Log2 concentration	-0.294455	1.21048	161.633	1.19302	0.234612		1
CCL20	0.451563	0.380924	1.37 (0.82-2.29)	pg/mL	Log2 concentration	-0.295049	1.19818	159.943	1.18544	0.237602		1
CCL4	0.315108	0.280905	1.24 (0.85-1.82)	pg/mL	Log2 concentration	-0.235466	0.865683	156.928	1.12176	0.263678		1
CCL5	0.270569	0.295152	1.21 (0.81-1.8)	pg/mL	Log2 concentration	-0.307929	0.849067	149.969	0.916711	0.360766		1
IL-7	0.0205102	0.196484	1.01 (0.78-1.32)	pg/mL	Log2 concentration	-0.364598	0.405619	165.233	0.104386	0.916989		1
IFNg	0.908959	0.571116	2.48 (0.81-7.6)	Detectable	Log-odds	-0.210429	2.02835			0.111486	1.59155	0.89189
IL-10	0.909144	0.601927	2.48 (0.76-8.08)	Detectable	Log-odds	-0.270632	2.08892			0.130944	1.51039	0.916608
IL-12p70	0.545214	0.647172	1.72 (0.49-6.13)	Detectable	Log-odds	-0.723243	1.81367			0.399533	0.842456	1

## Sheet: Meta-analysis
Assay	Difference	StdError	Ratio95CI	ModelOutcome	Units	Lower95Ci	Upper95Ci	Df	T	PValue	Z	HolmBonferroniAdjusted	Study	N	I2
CCL20	0.525351	0.359246	1.44 (0.88-2.34)	pg/mL	Log2 concentration	-0.178772	1.22947			0.145511			Current study	2
CCL20	-0.284521	0.418816	0.82 (0.46-1.45)	pg/mL	Log2 concentration	-1.1054	0.536358			0.506628			Ghosh-2018	2
CCL20	0.14903	0.403924	1.11 (0.64-1.92)	pg/mL	Log2 concentration	-0.642661	0.940721			0.712161		1	Meta	2	0.535801
CCL4	0.416098	0.269181	1.33 (0.93-1.92)	pg/mL	Log2 concentration	-0.111497	0.943693			0.124108			Current study	2
CCL4	0.429149	0.225289	1.35 (0.99-1.83)	pg/mL	Log2 concentration	-0.0124171	0.870716			0.0585318			Jespers-2016	2
CCL4	0.423773	0.172765	1.34 (1.06-1.7)	pg/mL	Log2 concentration	0.0851542	0.762392			0.0141713		0.0664933	Meta	2	0
CCL5	0.38997	0.279892	1.31 (0.9-1.92)	pg/mL	Log2 concentration	-0.158619	0.938559			0.165512			Current study	2
CCL5	0.729743	0.177641	1.66 (1.3-2.11)	pg/mL	Log2 concentration	0.381566	1.07792			6.58954e-05			Jespers-2016	2
CCL5	0.628702	0.155312	1.55 (1.25-1.91)	pg/mL	Log2 concentration	0.32429	0.933113			5.16599e-05		0.00036162	Meta	2	0.0480716
CXCL10	0.738879	0.317828	1.67 (1.08-2.57)	pg/mL	Log2 concentration	0.115937	1.36182			0.0212685			Current study	2
CXCL10	0.0916718	0.378571	1.07 (0.64-1.78)	pg/mL	Log2 concentration	-0.650327	0.833671			0.808944			Jespers-2016	2
CXCL10	0.447956	0.321949	1.36 (0.88-2.11)	pg/mL	Log2 concentration	-0.183065	1.07898			0.164109		0.492326	Meta	2	0.416702
CXCL8	1.01456	0.332707	2.02 (1.29-3.17)	pg/mL	Log2 concentration	0.362458	1.66667			0.00265032			Current study	3
CXCL8	0.438959	1.07142	1.36 (0.32-5.81)	pg/mL	Log2 concentration	-1.66103	2.53895			0.687461			Ghosh-2018	3
CXCL8	1.27804	0.407346	2.43 (1.39-4.22)	pg/mL	Log2 concentration	0.479641	2.07644			0.00199517			Jespers-2016	3
CXCL8	1.08276	0.250536	2.12 (1.51-2.98)	pg/mL	Log2 concentration	0.591708	1.57381			1.54783e-05		0.000123826	Meta	3	0
IL-1a	0.669155	0.237702	1.59 (1.15-2.2)	pg/mL	Log2 concentration	0.203258	1.13505			0.00551068			Current study	3
IL-1a	1.44354	0.639816	2.72 (1.14-6.49)	pg/mL	Log2 concentration	0.1895	2.69758			0.038407			Ghosh-2018	3
IL-1a	1.16374	0.243435	2.24 (1.61-3.12)	pg/mL	Log2 concentration	0.686612	1.64088			4.52019e-06			Jespers-2016	3
IL-1a	0.968929	0.219514	1.96 (1.45-2.64)	pg/mL	Log2 concentration	0.538681	1.39918			1.01493e-05		9.13439e-05	Meta	3	0.275687
IL-1b	1.32828	0.431103	2.51 (1.4-4.51)	pg/mL	Log2 concentration	0.483319	2.17324			0.00241731			Current study	3
IL-1b	0.377124	1.08512	1.3 (0.3-5.67)	pg/mL	Log2 concentration	-1.74971	2.50396			0.732715			Ghosh-2018	3
IL-1b	0.949419	0.371485	1.93 (1.17-3.2)	pg/mL	Log2 concentration	0.221309	1.67753			0.0114674			Jespers-2016	3
IL-1b	1.06462	0.272405	2.09 (1.44-3.03)	pg/mL	Log2 concentration	0.530708	1.59853			9.29729e-05		0.000557837	Meta	3	0
IL-6	0.806836	0.391008	1.75 (1.03-2.98)	pg/mL	Log2 concentration	0.0404593	1.57321			0.0406234			Current study	3
IL-6	-0.597047	1.42057	0.66 (0.1-4.55)	pg/mL	Log2 concentration	-3.38136	2.18727			0.679866			Ghosh-2018	3
IL-6	0.414252	0.237725	1.33 (0.96-1.84)	pg/mL	Log2 concentration	-0.051689	0.880193			0.0833965			Jespers-2016	3
IL-6	0.497817	0.201084	1.41 (1.07-1.86)	pg/mL	Log2 concentration	0.103693	0.891941			0.0132987		0.0664933	Meta	3	0
TNF	0.686536	0.291545	1.61 (1.08-2.39)	pg/mL	Log2 concentration	0.115107	1.25796			0.019686			Current study	2
TNF	-1.14932	0.549174	0.45 (0.21-0.95)	pg/mL	Log2 concentration	-2.2257	-0.0729367			0.0526582			Ghosh-2018	2
TNF	-0.172402	0.91603	0.89 (0.26-3.08)	pg/mL	Log2 concentration	-1.96782	1.62302			0.850716		1	Meta	2	0.885297
